# Supplementary material for: Efficacy of home-based non-pharmacological interventions for treating depression: a systematic review and network meta-analysis of randomised controlled trials
Source: PubMed Central journal article supplement — BMJ Open. 2017 Jul 12;7(7):e014499. doi: 10.1136/bmjopen-2016-014499 (PMC5734422; doi:10.1136/bmjopen-2016-014499), 2017-07-12

## **Supplementary Figure legends**

**Supplementary Figure 1.** Pooled standardized mean difference between home-based psychological intervention and usual care according to severities of depression

**Supplementary Figure 2.** Pooled standardized mean difference between home-based exercise, combined psychological intervention with exercise and usual care

**Supplementary Figure 3.** Pooled risk ratio of disease remission between home-based psychological intervention and usual care

**Supplementary Figure 4.** Pooled risk ratio of disease remission between home-based exercise, combined psychological intervention with exercise and usual care

**Supplementary Figure 5.** Network plot of all available home-based interventions

**Supplementary Figure 6.** Funnel plots of home-based psychological intervention and home-based exercise

**Supplementary Figure 7.** Funnel and contour enhanced funnel plot of combined psychological intervention with exercise

# Supplementary Figure 1

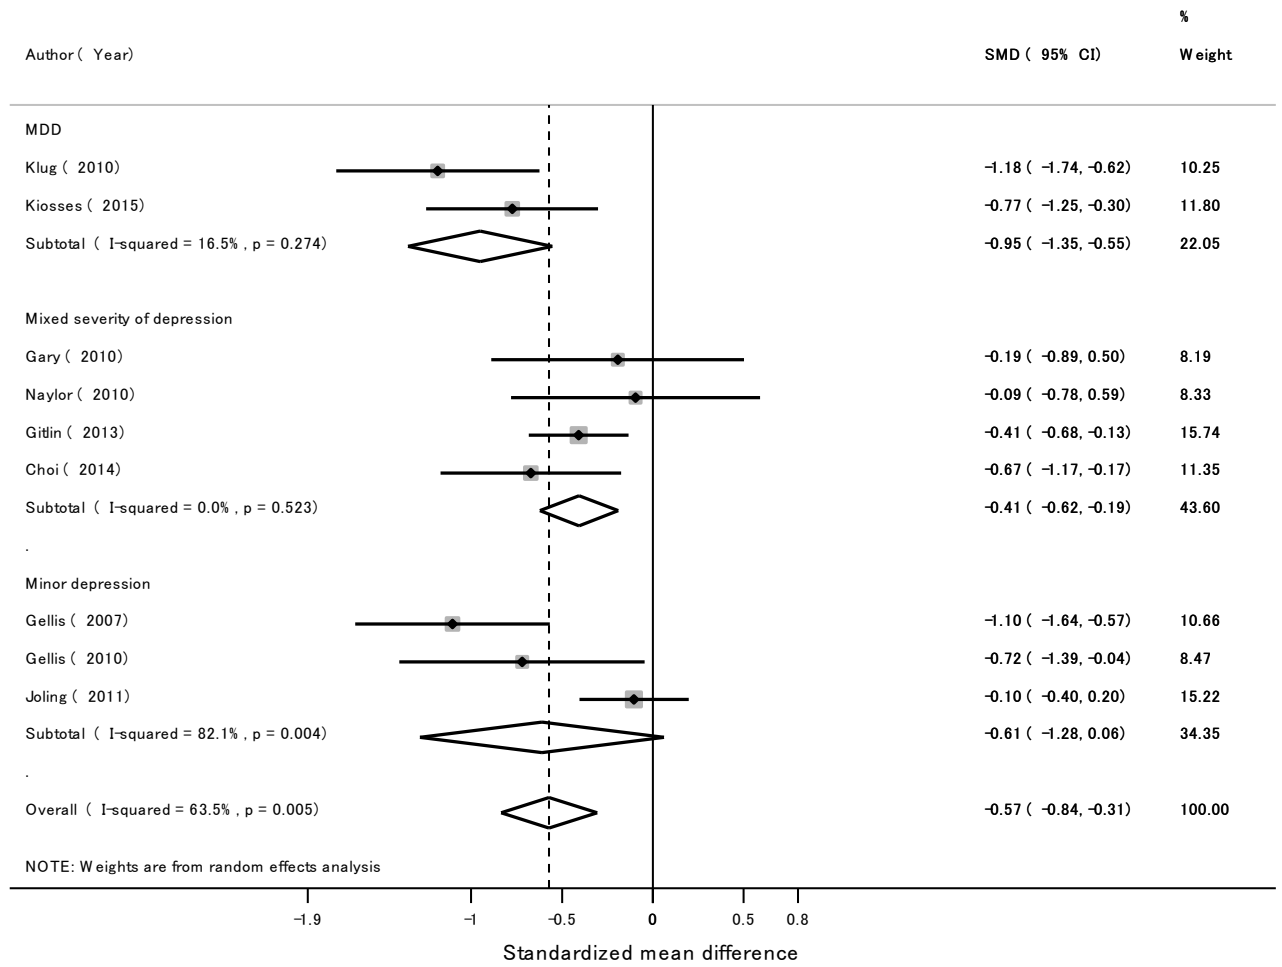

## Supplementary Figure 2

### A. Home-based exercise

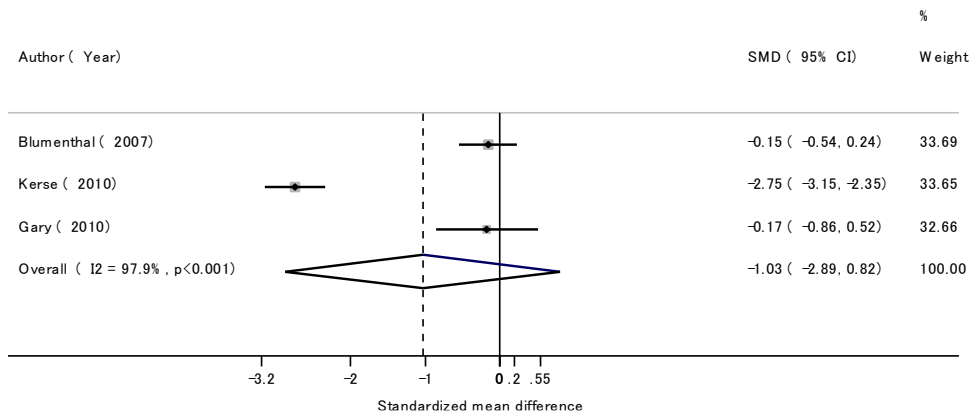

### B. Combined home-based psychological intervention with exercise

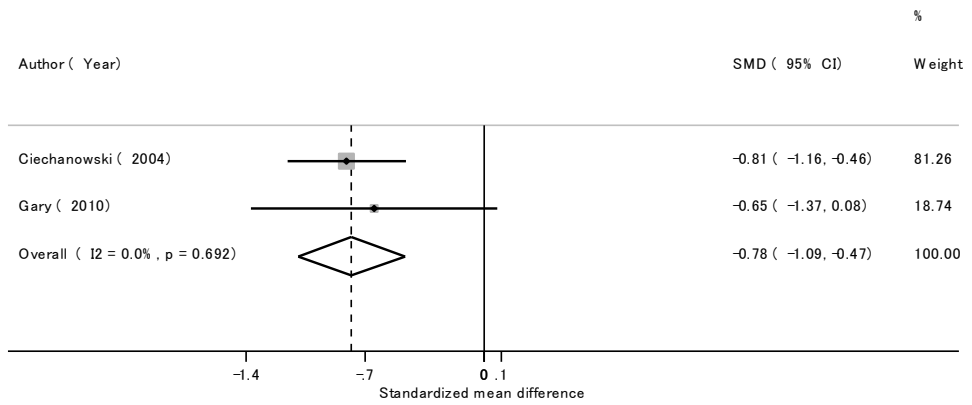

### Supplementary Figure 3

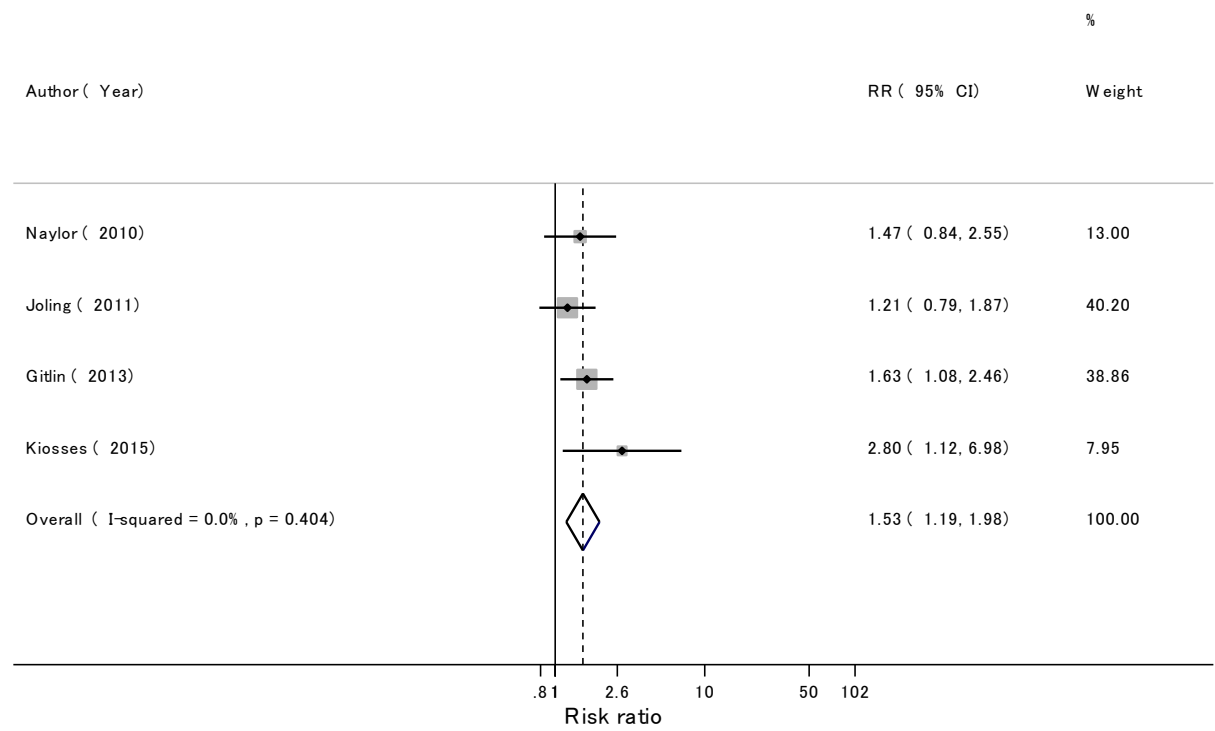

Supplementary Figure 4

A. Home-based exercise

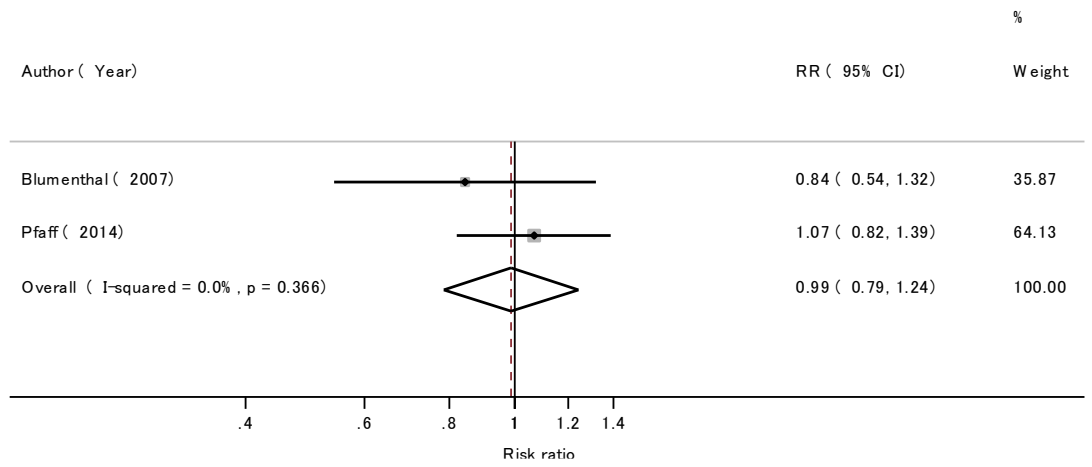

B. Combined home-based psychological intervention with exercise

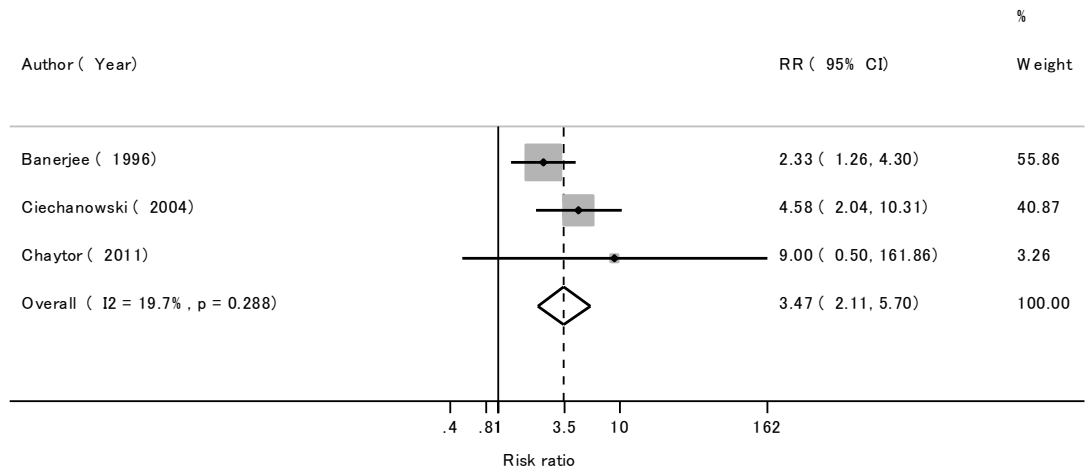

Supplementary Figure 5

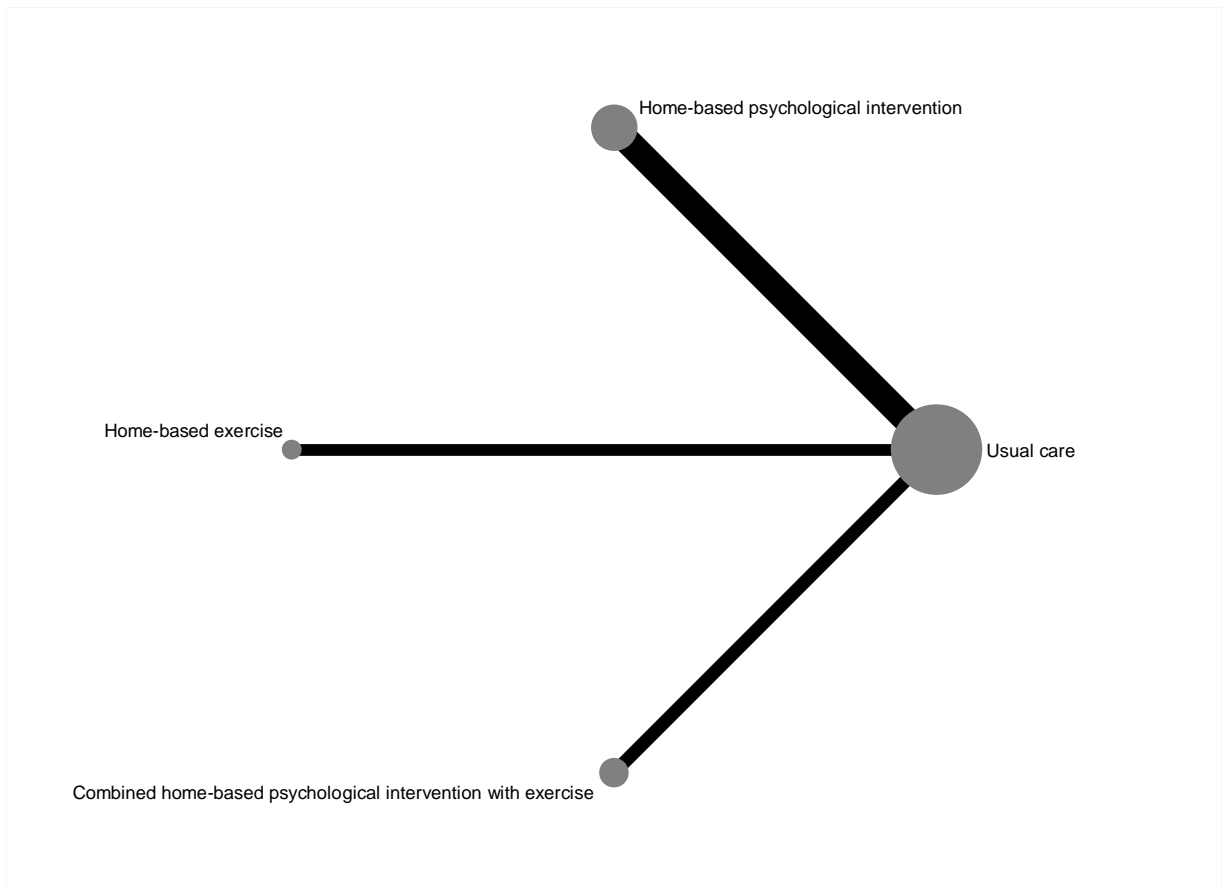

### Supplementary Figure 6

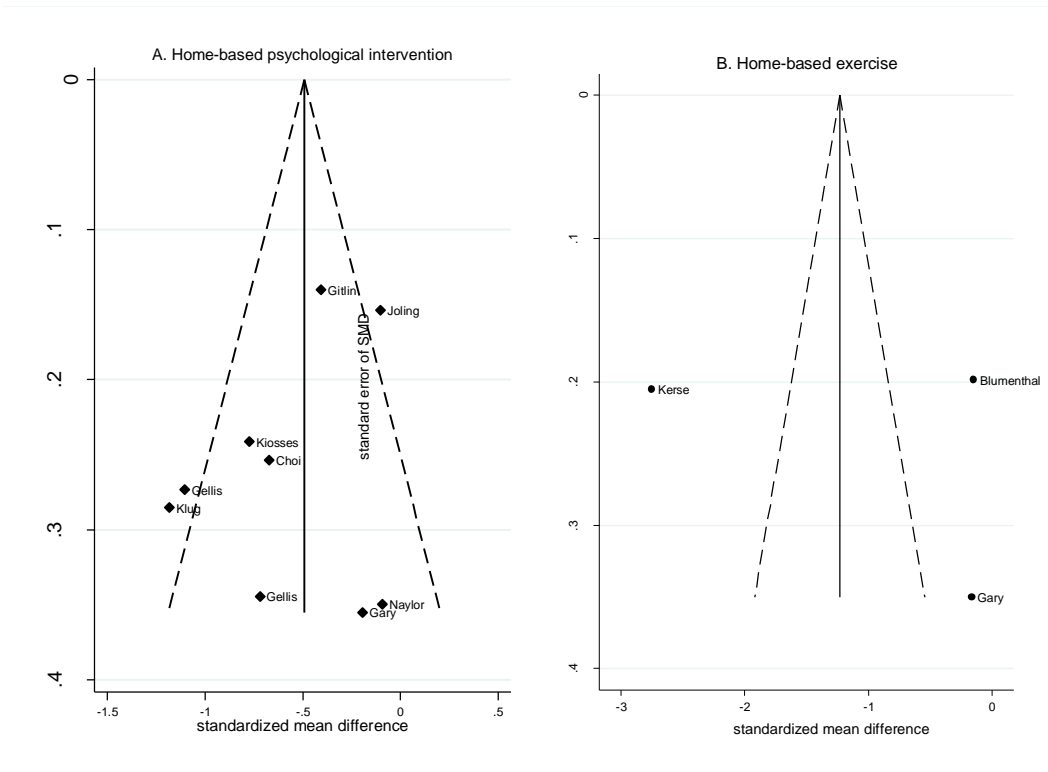

Supplementary Figure 7

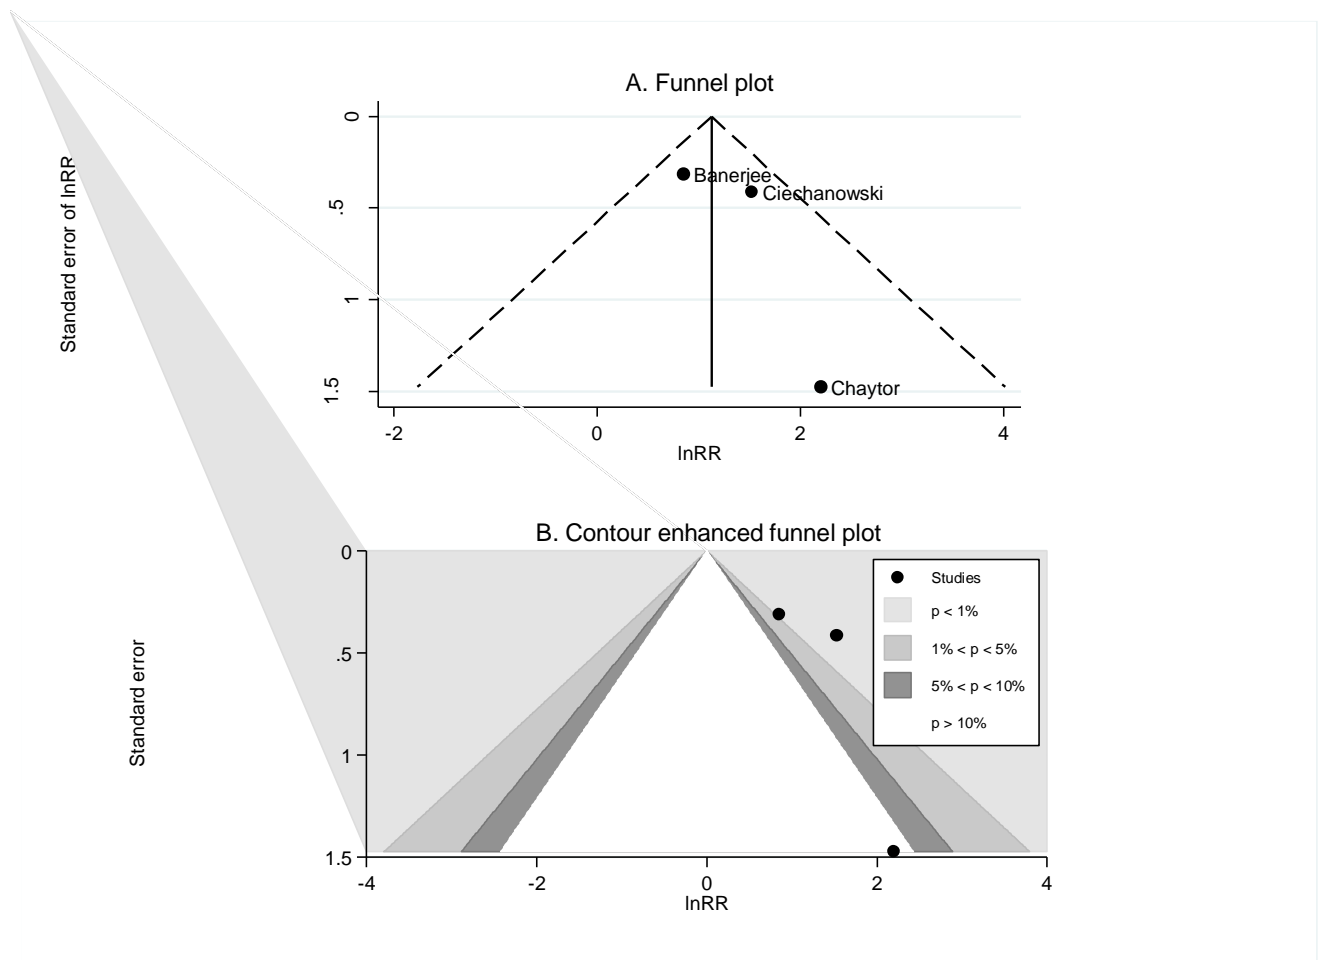

Supplement: bmjopen-2016-014499supp002.pdf [file bmjopen-2016-014499supp002.pdf]
