# Supplementary material for: Efficacy of home-based non-pharmacological interventions for treating depression: a systematic review and network meta-analysis of randomised controlled trials
Source: PubMed Central journal article supplement — BMJ Open. 2017 Jul 12;7(7):e014499. doi: 10.1136/bmjopen-2016-014499 (PMC5734422; doi:10.1136/bmjopen-2016-014499), 2017-07-12
Supplement: bmjopen-2016-014499.draft_revisions.pdf [file bmjopen-2016-014499.draft_revisions.pdf]

# BMJ Open

## Efficacy of home-based non-pharmacological interventions for treating depression: a systematic review and network meta-analysis of randomized-controlled trials

|                                 |                                                                                                                                                                                                                                                                                                                                                                                                                                                                                                                                                                                                                                                                                 |
|---------------------------------|---------------------------------------------------------------------------------------------------------------------------------------------------------------------------------------------------------------------------------------------------------------------------------------------------------------------------------------------------------------------------------------------------------------------------------------------------------------------------------------------------------------------------------------------------------------------------------------------------------------------------------------------------------------------------------|
| Journal:                        | <i>BMJ Open</i>                                                                                                                                                                                                                                                                                                                                                                                                                                                                                                                                                                                                                                                                 |
| Manuscript ID                   | bmjopen-2016-014499                                                                                                                                                                                                                                                                                                                                                                                                                                                                                                                                                                                                                                                             |
| Article Type:                   | Research                                                                                                                                                                                                                                                                                                                                                                                                                                                                                                                                                                                                                                                                        |
| Date Submitted by the Author:   | 28-Sep-2016                                                                                                                                                                                                                                                                                                                                                                                                                                                                                                                                                                                                                                                                     |
| Complete List of Authors:       | Sukhato, Kanokporn; Faculty of Medicine, Ramathibodi Hospital, Mahidol university, Department of Family Medicine<br>Lotrakul, Manoch; Faculty of Medicine, Ramathibodi Hospital, Mahidol university, Department of Psychiatry<br>Dellow, Allan; Faculty of Medicine, Ramathibodi Hospital, Mahidol university<br>Ittasakul, Pichai ; Faculty of Medicine, Ramathibodi Hospital, Mahidol university, Department of Psychiatry<br>Thakkinstian, Ammarin; Faculty of Medicine Ramathibodi Hospital, Mahidol University, Section for Clinical Epidemiology and Biostatistics<br>Anothaisintawee, Thunyarat; Ramathibodi Hospital, Mahidol University, Department of family medicine |
| <b>Primary Subject Heading</b>: | Mental health                                                                                                                                                                                                                                                                                                                                                                                                                                                                                                                                                                                                                                                                   |
| Secondary Subject Heading:      | Evidence based practice, General practice / Family practice                                                                                                                                                                                                                                                                                                                                                                                                                                                                                                                                                                                                                     |
| Keywords:                       | depression, treatment, home-based intervention, systematic review, network meta-analysis                                                                                                                                                                                                                                                                                                                                                                                                                                                                                                                                                                                        |
|                                 |                                                                                                                                                                                                                                                                                                                                                                                                                                                                                                                                                                                                                                                                                 |

SCHOLARONE™  
Manuscripts

1  
2  
3 **Efficacy of home-based non-pharmacological interventions for treating depression:**  
4 **a systematic review and network meta-analysis of randomized-controlled trials**  
5  
6  
7

8 Kanokporn Sukhato, M.D.

9  
10 Department of Family Medicine, Faculty of Medicine, Ramathibodi Hospital, Mahidol University,  
11 Bangkok, Thailand  
12

13  
14  
15 Manoch Lotrakul, M.D.

16  
17 Department of Psychiatry, Faculty of Medicine, Ramathibodi Hospital, Mahidol University, Bangkok,  
18 Thailand  
19  
20

21  
22  
23 Alan Dellow, M.Med.Ed, FRCGP

24 Faculty of Medicine, Ramathibodi Hospital, Mahidol University, Bangkok, Thailand  
25  
26  
27

28  
29 Pichai Ittasakul, M.D.

30 Department of Psychiatry, Faculty of Medicine, Ramathibodi Hospital, Mahidol University, Bangkok,  
31 Thailand  
32  
33

34  
35  
36 Ammarin Thakkinstian, Ph.D.

37  
38 Section for Clinical Epidemiology & Biostatistics, Faculty of Medicine, Ramathibodi Hospital, Mahidol  
39 University, Bangkok, Thailand  
40  
41

42  
43  
44 Thunyarat Anothaisintawee, M.D., Ph.D.

45 Department of Family Medicine, Faculty of Medicine, Ramathibodi Hospital, Mahidol University,  
46 Bangkok, Thailand  
47  
48

49  
50  
51 **Corresponding author:** Thunyarat Anothaisintawee

52  
53 **Postal address:** Department of Family Medicine, Ramathibodi Hospital, 270 Rama VI Road,  
54 Ratchatewi, Bangkok, Thailand 10400  
55

56 **Tel:** +6622011406  
57  
58  
59  
60

1  
2  
3 **Fax:** +6622011486

4 **Email:** [thunyarat.ano@mahidol.ac.th](mailto:thunyarat.ano@mahidol.ac.th)

5  
6 **Key words:** depression; treatment; home-based intervention; systematic review; network meta-  
7  
8 analysis  
9

10 **Word count:** 4,910 words  
11  
12  
13  
14  
15  
16  
17  
18  
19  
20  
21  
22  
23  
24  
25  
26  
27  
28  
29  
30  
31  
32  
33  
34  
35  
36  
37  
38  
39  
40  
41  
42  
43  
44  
45  
46  
47  
48  
49  
50  
51  
52  
53  
54  
55  
56  
57  
58  
59  
60

For peer review only

**Abstract:**

**Objectives:** To systematically review and compare the efficacy of all available home-based non-pharmacological treatments of depression.

**Design:** Systematic review and network meta-analysis of randomized controlled trials.

**Data sources:** Medline, Scopus, and CINAHL databases were searched since initiations to 7<sup>th</sup> August 2016.

**Eligibility criteria:** Randomized controlled trials comparing the efficacy of home-based non-pharmacological interventions with usual care of depressed patients were included in the review.

**Main outcomes:** Depression symptom scores and disease remission rates at the end of treatment.

**Results:** Seventeen studies were included in the review. Home-based non-pharmacological interventions were categorized as 1) home-based psychological intervention, 2) home-based exercise, 3) combined home-based psychological intervention with exercise, and 4) complimentary or alternative medicine. Complementary and alternative medicine approaches were excluded from the meta-analysis due to heterogeneity.

The standardized mean differences of post-treatment depression symptom scores between usual care groups and home-based psychological intervention, home-based exercise, and combined home-based psychological intervention with exercise were -0.57 (95%CI:-0.84, -0.31), -1.03 (95%CI:-2.89, 0.82), and -0.78 (95% CI:-1.09,-0.47), respectively. These results suggest that only home-based psychological intervention and combined home-based psychological intervention with exercise could significantly decrease depression scores. Compared with usual care groups, the disease remission rate was also significantly higher for home-based psychological intervention (pooled risk ratio = 1.53; 95% CI: 1.19, 1.98) and combined home-based psychological intervention with exercise (pooled risk ratio = 3.47; 95% CI: 2.11, 5.70). Of all the studied interventions, combined home-based psychological intervention with exercise had the highest probability of resulting in disease remission.

**Conclusion:** Our study confirms the efficacy of home-based psychological intervention and combined home-based psychological intervention with exercise in the treatment of depression. Combined home-based psychological intervention and exercise was the best treatment and should be considered for inclusion in clinical guidelines for managing depression.

### Strengths and limitations of this study

- Our analysis provides the first comprehensive review of the efficacy of home-based non-pharmacological interventions in treating depression.
- A comprehensive search was undertaken to identify as many relevant studies as possible.
- We performed a network meta-analysis to compare the efficacy of home-based interventions in order to identify the best treatment regimen.
- The quality of included studies in the area of allocation concealment was not optimal.
- Participants in our included studies were aware of their own intervention and the outcomes were subjective.

## INTRODUCTION

Recent studies have highlighted the international recognition of depression as one of the leading global burdens of disease (GBD)<sup>1</sup>. Depression is associated not only with greater morbidity and mortality but also with increasing health service use and costs<sup>2</sup>. In addition, untreated depression has been recognized as a strong predictor of poor health outcomes in elderly<sup>3-5</sup> and adult patients with chronic disease<sup>6-8</sup>.

Both pharmacological and non-pharmacological interventions, such as psychotherapy or supervised exercise, have been accepted as standard treatments of depression. However, concerns about drug side effects and dependency appear to make patients prefer psychological interventions. One study showed that around 70% of depressed patients were non-compliant with antidepressants because of concerns about their side effects<sup>9</sup>. Even though non-pharmacological interventions were preferred over antidepressants<sup>10 11</sup>, only a very small percentage of patients referred for psychotherapy were able to enter and complete this treatment<sup>12</sup>. This inconsistency between patient preference and low rates of initiation and adherence to treatment could be a consequence of barriers to obtaining treatment. Non-pharmacological interventions are usually clinic or hospital-based and require visits on a weekly or monthly basis. In one study, 70% of patients reported structural barriers preventing them from attending psychotherapy sessions regularly and cited time constraints, transportation problems and cost as being significant obstacles<sup>13</sup>.

Among older patients, whose prevalent rate of depression is very high, these problems were aggravated by concurrent medical illness, social isolation, functional impairment or being home-bound<sup>14-20</sup>. Overcoming these barriers by providing interventions in patients' own homes may achieve better treatment adherence and thereby greater treatment success than clinic or hospital-based interventions.

Home-based non-pharmacological interventions, such as problem solving therapy<sup>21-25</sup> and home-based exercise<sup>26 27</sup>, have developed over several years. Although some studies have suggested that these approaches can improve depressive symptoms and rates of remission when compared with standard usual care<sup>26 28 29</sup>, other studies have reported conflicting results<sup>27 30 31</sup>. Until now, no study has systematically reviewed all possible home-based non-pharmacological interventions and summarised the treatment effect of each intervention. Our systematic review and network meta-analysis was, therefore, undertaken with the aim of reviewing all available home-based

1  
2  
3 non-pharmacological interventions, pooling the effect sizes of each intervention on symptom  
4 improvement and indirectly comparing treatment efficacy between the different interventions. The  
5 results of this review should be useful for identifying the most beneficial home-based non-  
6 pharmacological interventions and for informing clinical guidelines for treating depression.  
7  
8  
9

## 10 **METHODS**

### 11 **Search strategy**

12  
13  
14  
15 Relevant studies were identified using Medline, Scopus, and CINAHL databases searched  
16 from inception to 7<sup>th</sup> August 2016. Reference lists of included studies were also explored. Search  
17 terms and search strategies for each database are presented in a Supplementary Appendix.  
18  
19

### 20 **Selection of studies**

21  
22  
23  
24 Initially studies were selected from titles and abstracts by two independent reviewers (K.S.  
25 and T.A.). Full articles were retrieved to aid decision making if decision could not be made based on  
26 titles and abstracts. Disagreement between the two reviewers was resolved by discussion.  
27 Percentage agreement between the two reviewers was estimated using kappa statistics.  
28  
29  
30

### 31 **Inclusion criteria**

32  
33  
34 Randomized-controlled trials published in English were eligible for the review if they met all of  
35 the following criteria:  
36  
37

- 38  
39 1. Study participants were adults aged more than 18 years with a diagnosis of any degree of  
40 depressive disorder using the criteria of the Diagnostic and Statistical Manual of Mental  
41 Disorders 4th Edition (DSM-IV) or any diagnostic tool used for diagnosis or screening for  
42 depression. Participants who were children, adolescents or postpartum women were  
43 excluded.  
44  
45  
46  
47
- 48 2. Interested interventions were non-pharmacological and provided in the patient's home, such  
49 as cognitive behavioral therapy, problem solving therapy, family therapy, or home-based  
50 exercise.  
51  
52
- 53 3. Treatment comparison was the standard care of depression in outpatient clinics or hospital  
54 settings.  
55  
56  
57  
58  
59  
60

4. Outcomes were measured by the level or severity of depressive symptoms or the incidence of disease remission at the end of the intervention.
5. Studies provided sufficient data for analysis, such as number of participants (n), mean depression score, standard deviation (SD) for each intervention group, and the number of patients per intervention group with or without disease remission.

### Data extraction

Two reviewers (KS and TA) independently used a standardized data record form to extract baseline characteristics of included studies and outcomes of interest. Disagreement between the two reviewers was resolved by discussion and corresponding authors of studies were contacted if information was incomplete.

### Interested interventions

Home-based non-pharmacological intervention was defined as any care or management of depression provided by health care professionals at a patient's place of residence. Home-based interventions had to have a clear and definite objective. Home visits that provided only health-education, social or emotional support were, therefore, excluded from this study.

### Outcomes of interest

The outcomes of interest were depressive symptom scores and disease remission rates at the end of treatment. Disease remission was defined according to the criteria of the original article. Included studies used several tools for measuring the severity of depressive symptoms, namely the Hamilton Depression Rating Scale (HAM-D)<sup>21 22 30 32 33</sup>, Patient Health Questionnaire-9 (PHQ-9)<sup>24 34</sup>, Geriatric Depression Scale (GDS)<sup>23 26 28</sup>, Hopkins Symptom Checklist-20 (HSCL-20)<sup>35 36</sup>, Montgomery Asberg Depression Rating Scale (MADRS)<sup>18 25 27</sup>, Beck Depression Inventory-Fast Screen (BDI-FS)<sup>37</sup> and Center of Epidemiologic Studies Depression Scale (CES-D)<sup>38</sup>. These tools have different score ranges (HAM-D = 0-53, PHQ-9 = 0-27, GDS = 0-15, HSCL-20 = 0-4, MADRS = 0-60, BDI-FS = 0-21, and CES-D = 0-60) with higher scores in all tools representing increasing severity of depressive symptoms.

### Risk of bias assessment



1  
2  
3 To assess the quality of included studies, a risk of bias assessment tool<sup>39</sup> was applied by two  
4 independent reviewers (K.S., T.A.). Six domains were evaluated as follows: 1) random sequence  
5 generation 2) allocation concealment 3) blinding of participants and personnel 4) blinding of outcome  
6 assessors 5) incomplete outcome data 6) selective outcome reporting 7) other sources of bias. The  
7 quality of the studies was classified as being at high, unclear, or low risk of bias. Disagreement  
8 between the two reviewers was settled by discussion.  
9  
10  
11  
12  
13

### 14 **Statistical analysis**

15  
16  
17 Because depression scores were measured differently among the studies, for direct  
18 comparison the mean differences of depressive scores between intervention and control groups were  
19 estimated for each study and then were pooled using the standardized mean difference (SMD).  
20 Heterogeneity between studies was estimated by Q test and  $I^2$  statistic. Heterogeneity between  
21 studies was considered if the P-value from Q test was less than 0.10 or if  $I^2$  was equal to or greater  
22 than 25%<sup>40</sup>. If heterogeneity was presented, the SMD was estimated by applying the random effect  
23 model. Otherwise the fix effect model was applied.  
24  
25  
26  
27  
28  
29

30  
31 For dichotomous outcomes, relative risks (RR) of disease remission were calculated for each  
32 study. The random effect model was used for pooling RR if there was evidence of heterogeneity  
33 between studies. Otherwise the inverse variance method was used. Sources of heterogeneity were  
34 explored by considering possible factors one by one in a meta-regression model (e.g. mean age,  
35 severity of depression at baseline and types of intervention delivery).  
36  
37  
38  
39

40  
41 For network meta-analysis, treatment effects for each study were estimated using a two-stage  
42 network meta-analysis. Firstly, summary data was expanded into individual patient data using the  
43 'expand' command in STATA program. Binary regression was applied to estimate log (RR) and  
44 variance-covariance of each treatment using 'mvmeta' make command. A multivariate random effect  
45 meta-analysis was used to calculate the pooled RRs and their 95% confidence intervals (CI). Riley's  
46 method was used for considering subject-study correlation. Treatment ranking was made according to  
47 the linear predictor of each study. Disagreement between direct and indirect estimations  
48 (inconsistency assumption) was examined by measuring the inconsistency factor, i.e. the difference  
49 between lnRRs estimated from direct and indirect meta-analyses.  
50  
51  
52  
53  
54  
55  
56  
57  
58  
59  
60

1  
2  
3 Publication bias was assessed using Egger test and funnel plot. If the funnel plot showed  
4 asymmetry, a contour enhanced funnel plot was performed to explore whether asymmetry was the  
5 result of heterogeneity between studies or arisen from publication bias. All analyses were performed  
6 using STATA version 14. A two-sided test with P-value less than 0.05 was considered statistically  
7 significant, except for the Q test, in which a P-value less than 0.10 was applied.  
8  
9

### 10 11 12 **Patient involvement**

13  
14  
15 Patients were not involved in the design of the study, development of outcome measures, or  
16 conduct of the study. We did not ask patients for advice on interpreting or writing up results. There are  
17 no plans to disseminate the results of the research to study participants.  
18  
19

## 20 21 **RESULTS**

22  
23 We identified 385, 534, 255, and 2 articles from Medline, Scopus, CINAHL databases and  
24 reference lists respectively. After deleting duplications, the titles and abstracts of 768 studies were  
25 reviewed. Finally, 17 studies met our inclusion criteria and were eligible in the review (Figure 1).  
26 Agreement of study selection between the two reviewers was high at 86.7% (Kappa = 0.50).  
27  
28  
29

### 30 31 32 **Study participants**

33  
34 The baseline characteristics of included studies are presented in Table 1. The type and  
35 severity of depression of participants differed between studies. Four studies<sup>25 28 32 33</sup> included patients  
36 with major depressive disorder, four<sup>22 23 36 38</sup> included patients with minor depression and nine<sup>18 21 24 26</sup>  
37  
38  
39  
40  
41  
42  
43  
44  
45  
46  
47  
48  
49  
50  
51  
52  
53  
54  
55  
56  
57  
58  
59  
60  
27 30 34 35 37 included patients with mixed severities of depression. Ten studies included elderly  
patients<sup>18 21-26 28 36 38</sup> while seven studies included adults with ages greater than 18 years<sup>27 30 32-35 37</sup>.  
Ten studies included depressed patients with other co-morbidities (i.e. epilepsy<sup>35</sup>, heart diseases<sup>22 30</sup>  
<sup>34</sup>, disability<sup>18</sup>, and mild to moderate cognitive impairment<sup>25</sup>). Twelve studies<sup>21 23 24 26-28 32 33 36-38</sup>  
included patients without co-morbidity. Use of anti-depressants at baseline varied widely between  
studies, ranging from 0% to 95%.

### 52 53 54 **Home-based interventions**

55  
56  
57  
58  
59  
60  
The composition of home-based non-pharmacological interventions differed among the  
included studies. The effect of interventions on depressive symptoms was, therefore, analyzed using

1  
2  
3 four general categories: 1) home-based psychological intervention 2) home-based exercise  
4  
5 3) combined home-based psychological intervention with home-based exercise 4) complementary or  
6  
7 alternative medicine. Eight, 3 and 3 studies compared home-based psychological intervention with  
8  
9 usual care, home-based psychological intervention with usual care, and combined home-based  
10  
11 psychological intervention with home-based exercise with usual care, respectively. One study  
12  
13 compared the efficacy between home-based psychological intervention, home-based exercise,  
14  
15 combined home-based psychological intervention with home-based exercise, and usual care. Since  
16  
17 interventions in the category of complementary or alternative medicine were heterogeneous, they  
18  
19 were not included in the meta-analysis but were subjected to qualitative analysis. Details of each  
20  
21 home-based intervention are summarised below:

### 22 ***Home-based psychological intervention***

23  
24 Home-based psychological intervention was classified as home-based problem-solving  
25  
26 treatment or home-based cognitive behavioral therapy.

#### 27 28 29 1. *Home-based problem-solving treatment* (6 studies<sup>21 22 24 25 28 29</sup>)

30  
31 Home-based problem-solving treatment (PST) is a skill-enhancing behavioral treatment of  
32  
33 depression usually delivered by social workers and psychologists. This approach assumes that  
34  
35 depressive symptoms are caused and maintained by problems of daily life and that these can be  
36  
37 reduced by identifying and addressing them systematically. Each PST session comprises 1) defining  
38  
39 and formulating the nature of the depressive problem 2) generating a range of alternative solutions to  
40  
41 the problem 3) systematically evaluating the possible consequences of each solution then selecting  
42  
43 the most appropriate one 4) monitoring and evaluating the actual outcome. In addition, PST identifies  
44  
45 patients' pleasurable activities and encourages them to participate in these activities.

#### 46 47 2. *Home-based cognitive behavioral therapy* (CBT) (3 studies<sup>30 37 38</sup>)

48  
49 The aim of CBT is to modify the dysfunctional emotions, behaviours, and thoughts of  
50  
51 depressed patients. This type of intervention was identified in 3 studies, of which 2 studies were CBT-  
52  
53 based bibliotherapy. In this approach, participants received self-help books or leaflets that included  
54  
55 instruction on cognitive behavioral self-help, mood management skills, and tasks to practice. During  
56  
57 the intervention period, participants were visited by home care nurses or contacted by telephone by

1  
2  
3 study investigators to assess their symptoms and encourage them to follow the course at their own  
4  
5 pace.

### 7 ***Home-based exercise***

8  
9  
10 Home-based exercise was employed in 4 studies. Exercise included both progressive  
11 resistance training, aerobic exercise<sup>26 27</sup> and aerobic exercise only<sup>30 33</sup>. Participants were required to  
12 perform the exercises for at least 30 minutes three times a week.  
13  
14

### 15 ***Combined home-based psychological intervention with exercise***

16  
17  
18 Home-based psychological intervention combined with exercise was the interested  
19 intervention in 4 studies. Each of these applied aerobic exercise as a home-based exercise but  
20 psychological therapies differed among them (PST in two studies<sup>35 36</sup>, cognitive behavioral therapy in  
21 one study<sup>30</sup> and family therapy with bereavement counselling and social interventions in one study<sup>18</sup>).  
22  
23  
24  
25

### 26 ***Complementary or alternative medicine***

27  
28  
29 This intervention refers to a broad set of health care practices or activities that are not  
30 integrated into the dominant health care system. This type of intervention was used in 2 studies. One  
31 involved home-based deep-breathing exercise<sup>34</sup> aimed at stimulating a relaxation response, (i.e. to  
32 decrease arousal, heart rate and blood pressure, and to reduce responsiveness of the sympathetic  
33 nervous system). Deep-breathing exercises can also help patients to disregard negative and  
34 distracting thoughts. Patients were trained by experienced nurses to breathe at a rate of six breaths  
35 per minute. During the treatment period, this was undertaken in a quiet environment for a period of  
36 ten minutes, three times each day.  
37  
38  
39  
40  
41  
42  
43

44  
45 The other intervention employed a spirituality teaching programme<sup>41</sup> aiming to promote  
46 contemplation of the inter-relation between meaning and purpose, connectedness with others, nature  
47 or the divine, and values such as compassion, love, justice, and forgiveness. The programme  
48 comprised eight sessions involving explanation of the divine aspect of the self, teaching breathing and  
49 visualization practice, helping patients to connect with the divine through prayer or meditation, letting  
50 go of regret and fostering gratitude, practicing self-awareness relating to the five senses, and building  
51 upon connectedness with others. Participants were also advised to avoid forming expectations and to  
52  
53  
54  
55  
56  
57  
58  
59  
60

1  
2  
3 refrain from judging outcomes. Initially patients participated in a workshop run by psychiatrists and  
4  
5 were then required to practice by themselves with the help of audio CDs.  
6

### 7 8 **Treatment comparison**

9  
10 Usual care, defined as the standard care of depression managed in a clinic or hospital setting,  
11 was applied as a treatment comparator for all studies. In addition to usual care, three studies<sup>25 26 29</sup>  
12 included home visits and two<sup>21 34</sup> included telephone support. However, these interventions provided  
13 education about depression together with general social or emotional support but did not offer specific  
14 psychological help or exercise. With the exception of one study<sup>41</sup>, almost all used anti-depressant  
15 medication as a co-intervention but the decision to initiate or maintain this was dependent on the  
16 judgement of patients and their physicians.  
17  
18  
19  
20  
21  
22

### 23 **Risk of bias assessment**

24  
25  
26 Results of risk of bias assessment are presented in Supplementary Table 1. Most of the  
27 studies (14 studies) reported low risk of bias in the domain of random sequence generation, while 3  
28 studies<sup>21 22 30</sup> reported unclear risk. For allocation concealment, 11 studies<sup>18 21 22 25-30 37 38</sup> had unclear  
29 risk of bias, while 6 studies<sup>24 33-36 41</sup> had low risk of bias. All studies reported high risk of bias in the  
30 domain of blinding of participants and personnel and low risk of bias in other domains. Ten studies<sup>18 22</sup>  
31  
32  
33  
34  
35  
36  
37  
38  
39  
40  
41  
42  
43  
44  
45  
46  
47  
48  
49  
50  
51  
52  
53  
54  
55  
56  
57  
58  
59  
60  
25-27 29 30 33 35 41 had low risk of bias for blinding of outcome assessors, whereas 7 studies<sup>21 24 28 34 36-38</sup>  
had unclear risk. For the domain of incomplete outcome data, 13 studies<sup>18 22 24-27 29 30 33 35 36 38 41</sup>  
reported low risk of bias and 4 studies<sup>21 28 34 37</sup> reported high risk. Almost all studies (16 studies) had  
low risk of bias for selective outcome reporting, while only one study<sup>35</sup> had high risk of bias.

### 43 **Pooled mean difference of depression score**

#### 44 *Home-based psychological intervention vs usual care*

45  
46  
47  
48  
49  
50  
51  
52  
53  
54  
55  
56  
57  
58  
59  
60  
Nine studies were analyzed<sup>21 22 24 25 28-30 37 38</sup> comparing home-based psychological  
intervention with usual care (N = 739). Depression scores were assessed at the end of treatment,  
which ranged from 6 to 48 weeks. The mean differences and 95% CIs of depression scores for each  
study are presented in Table 2. SMD of home-based psychological intervention versus usual care  
was -0.57 (95% CI: -0.84, -0.31), suggesting that home-based psychological intervention can  
significantly decrease depression scores when compared with usual care.

Moderate heterogeneity was found between studies, with  $I^2$  of 63.5%. Sources of heterogeneity were explored but none of the factors decreased  $I^2$ . Subgroup analyses were performed according to the severity of depression (i.e. major depressive disorder (MDD), minor depression and mixed severity of depression). These showed that SMDs in patients with MDD, minor depression, and mixed severity of depression were -0.95 (95% CI: -1.35, -0.55;  $I^2 = 16.5\%$ ), -0.61 (95% CI: -1.28, 0.06;  $I^2 = 82.1\%$ ), and -0.41, (95% CI: -0.62, -0.19;  $I^2 = 0\%$ ) respectively (see Supplementary Figure 1). These suggest that home-based psychological intervention reduces depression scores significantly in the groups of MDD and mixed severity of depression. In addition, the efficacy of this intervention in patients with MDD was better than the efficacy in patients with minor depression.

#### *Home-based exercise vs usual care*

Three studies<sup>26 30 33</sup> (N = 321) were pooled to compare the effect of home-based exercise with usual care. The SMD was -1.03 (95% CI: -2.89, 0.82;  $I^2 = 97.9\%$ ) (Table 2 and Supplementary Figure 2A). The mean depression score in the home-based exercise group was therefore 0.03 units lower than the mean depression score in the usual care group. However, this effect did not reach statistical significance.

#### *Combined home-based psychological intervention with exercise vs usual care*

Only two studies<sup>30 36</sup> (N = 169) had sufficient data for pooling the effect on the depression score of combined home-based psychological intervention with exercise. Mean depression scores were measured at the ends of the treatments, namely at 12 weeks<sup>30</sup> and 24 weeks<sup>36</sup>. Table 2 shows the mean depression scores and 95% CIs for each study. SMD was -0.78 (95% CI: -1.09, -0.47;  $I^2 = 0.0\%$ ) (Supplementary Figure 2B). This indicates that patients receiving combined home-based psychological intervention and exercise had significantly lower mean depression scores (by 0.78 units) than patients receiving usual care.

### **Pooled risk ratio of disease remission**

#### *Home-based psychological intervention vs usual care*

Four studies (N = 459) comparing the effectiveness of home-based psychological intervention with usual care had remission rates as their outcome of interest. Remission from depression was defined as HAMD score  $\leq 7$  in one studies<sup>25</sup>, PHQ-9  $\leq 4$  in one study<sup>24</sup>, BDI  $< 4$  in one study<sup>37</sup> and

1  
2  
3 CES-D < 16 in one study<sup>38</sup> (Table 3). The pooled RR was 1.53 (95% CI: 1.19, 1.98) (Supplementary  
4 Figure 3), suggesting that patients receiving home-based psychological intervention were  
5 approximately 1.7 times more likely to have remission from depression than patients receiving usual  
6 care. The results among studies were homogeneous with  $I^2$  of 0%.

#### 10 *Home-based exercise vs usual care*

11  
12  
13 Two studies (N = 248) reported their outcome as disease remission and had sufficient data  
14 for pooling. Disease remission was defined as HAMD score  $\leq 7$ <sup>33</sup> or symptoms no longer meeting the  
15 criteria for major and minor depression according to DSM-IV criteria<sup>27</sup> (Table 3). The pooled RR was  
16 0.99 (95% CI: 0.79, 1.24;  $I^2 = 0.0\%$ ) (Supplementary Figure 4A), indicating that there was no  
17 significant difference between home-based exercise and usual care in the likelihood of having  
18 remission from depression.  
19  
20  
21  
22  
23

#### 24 *Combined home-based psychological intervention and exercise vs usual care*

25  
26  
27 Three studies (N = 279) were pooled to compare remission rates between combined  
28 psychological intervention and usual care. Disease remission was defined as HSCL-20 score < 0.5 for  
29 two studies<sup>35 36</sup> but in Banerjee's study<sup>18</sup> the outcome was not clearly defined (Table 3). Pooled RR  
30 was 3.47 (95% CI: 2.11, 5.70;  $I^2 = 19.7\%$ ) suggesting that the combination of home-based  
31 psychological intervention and exercise significantly increased the likelihood of remission from  
32 depression when compared with usual care (Supplementary Figure 4B).  
33  
34  
35  
36  
37  
38

### 39 **Network meta-analysis**

#### 40 *Disease remission rate*

41  
42  
43  
44 Nine studies (N = 987) were included in the network meta-analysis. Supplementary Figure 5  
45 shows the network plot of home-based psychological intervention, home-based exercise, combined  
46 home-based psychological intervention with exercise, and usual care. Size of node and edge reflect  
47 the number of studies and patients respectively. From the plot, usual care was the common  
48 comparator and had the largest sample size of the four treatment regimes. Home-based  
49 psychological intervention versus usual care had the largest number of studies.  
50  
51  
52  
53  
54  
55  
56  
57  
58  
59  
60

1  
2  
3 Pooled RRs for each treatment comparison are presented in Figure 2. Compared with usual  
4 care, only combined home-based psychological intervention with exercise and home-based  
5 psychological intervention alone significantly increased the likelihood of disease remission, with  
6 pooled RRs of 3.12 (95% CI: 1.71, 5.70) and 1.50 (95% CI: 1.17, 1.93) respectively. In addition, the  
7 incidence of disease remission in home-based psychological intervention and combined home-based  
8 psychological intervention with exercise groups was significantly higher than in the home-based  
9 exercise group, having pooled RRs of 1.49 (95% CI: 1.07, 2.10) and 3.10 (95% CI: 1.63, 5.90),  
10 respectively. When compared with home-based psychological intervention alone, combined home-  
11 based psychological intervention with exercise also significantly improved the rate of disease  
12 remission (pooled RR = 2.08; 95% CI: 1.08, 3.99).  
13  
14  
15  
16  
17  
18  
19  
20  
21

22 Treatment ranking was assessed by estimating the probability of each treatment being the  
23 best. This yielded probabilities of 99.5%, 0.5%, and 0% for combined home-based psychological  
24 intervention with exercise, home-based psychological intervention alone, and home-based exercise  
25 respectively. Combined home-based psychological intervention with exercise therefore emerged as  
26 the best intervention for achieving remission from depression.  
27  
28  
29  
30  
31

32 Applying inconsistency assumptions to the treatments, inconsistency factors were calculated  
33 as 0.020 (Z=0.183, P-value=0.912) for home-based psychological intervention, -0.018 (Z=0.110, P-  
34 value=0.913) for home-based exercise, and 0.106 (Z=0.107, P-value=0.915) for combined home-  
35 based psychological intervention with exercise. These figures find no significant difference between  
36 the direct and indirect comparison of estimated treatment effects.  
37  
38  
39  
40  
41

#### 42 **Efficacy of complementary or alternative medicine**

43  
44 Results from a study comparing the efficacy of home-based deep-breathing exercises with  
45 usual care showed that patients receiving this intervention had significantly lower depression scores  
46 than patients receiving usual care, with a mean difference of -1.34 (95% CI: -1.17, -0.17). Another  
47 study compared the efficacy of home-based spiritual therapy with usual care. Findings from this study  
48 suggested that home-based spiritual therapy could significantly decrease depression scores when  
49 compared with usual care, with a mean difference of -1.11 (95% CI: -1.57, -0.65). In addition, this  
50 study found that patients receiving home-based spiritual therapy were more likely to have disease  
51  
52  
53  
54  
55  
56  
57  
58  
59  
60



1  
2  
3 remission than patients receiving usual care. The risk ratio of disease remission (defined as HAMD  
4 score  $\leq 7$ ) from this study was 13.85 (95% CI: 1.88, 101.74)  
5  
6

### 7 **Publication bias**

8  
9  
10 Egger tests and Funnel plots did not suggest any publication bias for pooling the effect of  
11 home-based psychological intervention (coefficient = -0.05, P-value = 0.882) and home-based  
12 exercise (coefficient = 6.94, P-value = 0.818) (see Supplementary Figure 6A and 6B). For combined  
13 home-based psychological intervention and exercise, the Egger test did not suggest publication bias  
14 but a funnel plot showed asymmetry (Supplementary Figure 7A). The cause of this asymmetry was  
15 explored by performing a contour enhanced funnel plot which showed that most of the studies fell  
16 inside the significant area. The asymmetrical plot may, therefore, result from a small study effect  
17 rather than heterogeneity between studies (see Supplementary Figure 7B).  
18  
19  
20  
21  
22  
23

### 24 **DISCUSSION**

25  
26  
27 Our study found that a combination of home-based psychological intervention with exercise  
28 and home-based psychological intervention alone both significantly decreased depressive symptoms  
29 and increased the likelihood of disease remission when compared with usual care. However, we  
30 could not demonstrate any benefit of home-based exercise alone when compared with usual care. In  
31 addition, combined home-based psychological intervention with exercise had the highest probability of  
32 remission from depression compared both with home-based psychological intervention and home-  
33 based exercise.  
34  
35  
36  
37  
38  
39

40  
41 The effectiveness of clinic-based psychological intervention for treating depression has been  
42 confirmed by previous studies<sup>42-44</sup>. The results of our study also support the efficacy of this  
43 intervention when performed in the patient's home. In our review, the majority of participants in the  
44 included studies were depressed patients with comorbidities such as epilepsy<sup>35</sup> or heart disease<sup>22 30</sup>  
45<sup>34</sup>, or were elderly patients with disabilities<sup>18</sup> or cognitive impairment<sup>25</sup>. These groups have a high  
46 prevalence of depression and should therefore be expected to receive a significant share of mental  
47 health provision. However, their ability to access conventional clinic-based mental health services is  
48 restricted by mobility problems and low motivation to seek help. With its ability to overcome these  
49 barriers, home-based psychological intervention is particularly appropriate in these situations.  
50  
51  
52  
53  
54  
55  
56  
57  
58  
59  
60

1  
2  
3 In addition to demonstrating the efficacy of home-based psychological intervention overall,  
4 subgroup analysis within our study raises an interesting point. Home-based psychological intervention  
5 decreased symptoms of depression for all types of depression but the effect was statistically  
6 significant only in patients with MDD and mixed severity depression, not for those with minor  
7 depression. This inconsistent finding may result from the so called “ceiling” effect. The level of  
8 depressive symptoms in minor depression is relatively low at baseline when compared with major  
9 depression, which could limit the potential for symptom improvement<sup>45</sup>. This ceiling effect was also  
10 found in the studies reviewing the use of antidepressant medication for minor depressive symptoms.  
11  
12  
13  
14  
15  
16  
17

18 The rationale for home-based exercise rests on the theory that increasing physical activity  
19 can improve depressive symptoms through psychological and physiological routes. Exercise serves  
20 as a distraction from worries and depressive thoughts, increases self-efficacy, and gives a sense of  
21 mastery. Possible physiological mechanisms include an increase in body temperature, leading to a  
22 feeling of relaxation and reduced muscle tension, an increase in levels of endorphins related to  
23 positive mood and a sense of well-being, and increases in the availability of the central  
24 neurotransmitters dopamine, norepinephrine and serotonin<sup>43,46 47</sup>. Although the advantages of clinic-  
25 based or supervised exercise to treat depression have been confirmed by previous literature<sup>48</sup>, our  
26 study found no benefit from home-based exercise in ameliorating depressive symptoms. The  
27 difference in these findings may be explained by poorer treatment compliance in the home-based  
28 exercise group, as to achieve significant benefit patients have to practice the exercise programme at  
29 a prescribed intensity and frequency. Lack of motivation and inattention are common symptoms in  
30 depression and may account for unsupervised patients failing to achieve the prescribed levels of  
31 activity when compared with those given encouragement through supervision. This assumption  
32 corresponds with findings from the home-based exercise studies<sup>26 27</sup> that the physical health of  
33 patients in this group (i.e. cardio-respiratory capacity, BMI, and lower limb strength), the surrogate  
34 endpoints of exercise intervention, did not change significantly from baseline.  
35  
36  
37  
38  
39  
40  
41  
42  
43  
44  
45  
46  
47  
48  
49

50 Although our study did not find any advantages of home-based exercise over usual care,  
51 when combined with psychological intervention the combined approach had a significantly greater  
52 benefit than either of these interventions alone. The combination may have a synergistic effect, with  
53  
54  
55  
56  
57  
58  
59  
60

1  
2  
3 psychological intervention improving motivation to initiate and maintain an exercise programme while  
4 the latter in turn enhances the benefits of psychological intervention.  
5  
6

7 Looking at complimentary or alternative medicine approaches, results from Chung et al and  
8 Rickhi et al showed that home-based deep-breathing training and spiritual teaching programmes  
9 could significantly reduce depressive symptoms when compared with usual care. However, these two  
10 studies had small sample sizes and included specific populations, namely coronary heart disease  
11 patients for Chung's study and middle-aged females for Rickhi's study. Their findings may not,  
12 therefore, be generalizable to other populations.  
13  
14  
15  
16  
17  
18

### 19 **Strengths and limitations**

20  
21 Our study has several strengths. Given the potential of home-based interventions to treat  
22 depression and the increasing use of these interventions, our analysis provides the first  
23 comprehensive review of the efficacy of home-based interventions in treating depression. A  
24 comprehensive search was undertaken to identify as many relevant studies as possible and two  
25 reviewers selected the studies independently with a high level of agreement. Selection bias was,  
26 therefore, unlikely. In addition, we performed a network meta-analysis to compare the efficacy of all  
27 available home-based interventions in order to identify the best treatment regime.  
28  
29  
30  
31  
32  
33  
34

35 We are aware that our study may have some limitations. Firstly, the quality of included studies  
36 in the area of allocation concealment was not optimal. The results from our study might, therefore, be  
37 affected by selection bias and should be interpreted with caution. Secondly, participants in our  
38 included studies were aware both of their own intervention and their subjective outcome, including the  
39 self-reported depression score. However, in most of the included studies this bias from non-blinded  
40 intervention was minimized by blinding the outcome assessors. Thirdly, some of the included studies  
41 considered home visits as a treatment comparator. This may have resulted in an underestimated  
42 treatment effect for the home-based interventions.  
43  
44  
45  
46  
47  
48  
49

### 50 **Clinical implication and further study**

51  
52 Depression is a common disorder, particularly among the elderly and in those with a chronic  
53 disease. Many of these patients have difficulty accessing mental health services due to physical  
54 disabilities and transportation problems. Home-based interventions to treat depression have the  
55  
56  
57  
58  
59  
60

1  
2  
3 potential to overcome these barriers and have been shown by our study to be effective. This  
4 information should prove helpful when designing clinical guidelines. However, there are obvious  
5 logistical differences between home-based treatments for depression and conventional clinic-based  
6 care. Our study has not investigated these aspects of treatment design and, in particular, has not  
7 considered manpower implications or transport costs. An economic evaluation study is needed before  
8 general implementation of a home-based care model can be recommended unequivocally.  
9  
10  
11  
12

13  
14  
15 Although a randomized-controlled trial is considered to be the gold standard for therapeutic  
16 research, in a real world setting this design may not be ideal for examining patient preferences and  
17 adherence to treatment. To maximize treatment efficacy, studies should determine the effects of  
18 patient preferences for different treatment approaches and modes of delivery as well as examine the  
19 factors that influence these preferences.  
20  
21  
22

## 23 24 **CONCLUSION**

25  
26  
27 Our study has confirmed the efficacy both of home-based psychological intervention and  
28 combined home-based psychological intervention with exercise in decreasing symptoms of  
29 depression and improving rates of remission. In addition, the combination of home-based  
30 psychological intervention and exercise has the highest probability of being the best treatment out of  
31 all available home-based interventions. This approach should, therefore, be considered when  
32 formulating clinical guidelines for treating depression.  
33  
34  
35  
36  
37

38  
39 **Contributors:** KS, PI, and TA were involved in the conception and design of the review. KS and TA  
40 developed the search strategy, performed study selection, extracted data from included studies and  
41 analyzed the data. KS, ML, PI, AD, AT and TA were involved in the interpretation and discussion of  
42 results. KS and TA drafted the manuscript. PI, AD, AT and TA revised it critically for important  
43 intellectual content. All authors approved the final version of the article. All authors had access to all  
44 of the data in the study and can take responsibility for the integrity of the data and the accuracy of the  
45 data analysis. TA is guarantor.  
46  
47  
48  
49  
50

51  
52 **Funding:** This research did not receive a specific grant from any funding agency in the public,  
53 commercial, or not-for-profit sectors.  
54  
55  
56  
57  
58  
59  
60

1  
2  
3 **Competing interests:** All authors have completed the ICMJE uniform disclosure form at  
4 [www.icmje.org/coi\\_disclosure.pdf](http://www.icmje.org/coi_disclosure.pdf) and declare: no support from any organisation for the submitted  
5 work; no financial relationships with any organisations that might have an interest in the submitted  
6 work in the previous three years; no other relationships or activities that could appear to have  
7 influenced the submitted work.  
8  
9

10  
11  
12 **Ethical approval:** Not required.

13  
14  
15 **Data sharing:** No additional data available.  
16  
17  
18  
19  
20  
21  
22  
23  
24  
25  
26  
27  
28  
29  
30  
31  
32  
33  
34  
35  
36  
37  
38  
39  
40  
41  
42  
43  
44  
45  
46  
47  
48  
49  
50  
51  
52  
53  
54  
55  
56  
57  
58  
59  
60

**Reference**

1. Ferrari AJ, Charlson FJ, Norman RE, et al. Burden of Depressive Disorders by Country, Sex, Age, and Year: Findings from the Global Burden of Disease Study 2010. *PLoS Med* 2013;**10**(11):e1001547.
2. Reddy MS. Depression: The Disorder and the Burden. *Indian J Psychol Med* 2010;**32**(1):1-2.
3. Penninx BW, Guralnik JM, Ferrucci L, et al. Depressive symptoms and physical decline in community-dwelling older persons. *JAMA* 1998;**279**(21):1720-6.
4. Rovner BW, German PS, Brant LJ, et al. Depression and mortality in nursing homes. *JAMA* 1991;**265**(8):993-6.
5. Unutzer J, Katon W, Callahan CM, et al. Collaborative care management of late-life depression in the primary care setting: a randomized controlled trial. *JAMA* 2002;**288**(22):2836-45.
6. Ciechanowski PS, Katon WJ, Russo JE. Depression and diabetes: impact of depressive symptoms on adherence, function, and costs. *Arch Intern Med* 2000;**160**(21):3278-85.
7. Frasure-Smith N, Lesperance F, Talajic M. Depression following myocardial infarction. Impact on 6-month survival. *JAMA* 1993;**270**(15):1819-25.
8. Katon W, Ciechanowski P. Impact of major depression on chronic medical illness. *J Psychosom Res* 2002;**53**(4):859-63.
9. Hunot VM, Horne R, Leese MN, et al. A Cohort Study of Adherence to Antidepressants in Primary Care: The Influence of Antidepressant Concerns and Treatment Preferences. *Primary Care Companion to The Journal of Clinical Psychiatry* 2007;**9**(2):91-99.
10. Churchill R, Khaira M, Gretton V, et al. Treating depression in general practice: factors affecting patients' treatment preferences. *The British journal of general practice : the journal of the Royal College of General Practitioners* 2000;**50**(460):905-6.
11. Riedel-Heller SG, Matschinger H, Angermeyer MC. Mental disorders--who and what might help? Help-seeking and treatment preferences of the lay public. *Social psychiatry and psychiatric epidemiology* 2005;**40**(2):167-74.
12. Jaycox LH, Miranda J, Meredith LS, et al. Impact of a primary care quality improvement intervention on use of psychotherapy for depression. *Mental health services research* 2003;**5**(2):109-20.

- 1  
2  
3 13. Mohr DC, Hart SL, Howard I, et al. Barriers to psychotherapy among depressed and  
4  
5  
6  
7  
8  
9  
10  
11  
12  
13  
14  
15  
16  
17  
18  
19  
20  
21  
22  
23  
24  
25  
26  
27  
28  
29  
30  
31  
32  
33  
34  
35  
36  
37  
38  
39  
40  
41  
42  
43  
44  
45  
46  
47  
48  
49  
50  
51  
52  
53  
54  
55  
56  
57  
58  
59  
60  
13. Mohr DC, Hart SL, Howard I, et al. Barriers to psychotherapy among depressed and  
nondepressed primary care patients. *Annals of behavioral medicine : a publication of the  
Society of Behavioral Medicine* 2006;**32**(3):254-8.
14. Geerlings SW, Beekman AT, Deeg DJ, et al. Physical health and the onset and persistence of  
depression in older adults: an eight-wave prospective community-based study. *Psychol Med*  
2000;**30**(2):369-80.
15. Schoevers RA, Beekman AT, Deeg DJ, et al. Risk factors for depression in later life; results of a  
prospective community based study (AMSTEL). *J Affect Disord* 2000;**59**(2):127-37.
16. Krishnan KR, George LK, Pieper CF, et al. Depression and social support in elderly patients with  
cardiac disease. *Am Heart J* 1998;**136**(3):491-5.
17. Prince MJ, Harwood RH, Thomas A, et al. A prospective population-based cohort study of the  
effects of disablement and social milieu on the onset and maintenance of late-life depression.  
The Gospel Oak Project VII. *Psychol Med* 1998;**28**(2):337-50.
18. Banerjee S, Shamash K, Macdonald AJ, et al. Randomised controlled trial of effect of intervention  
by psychogeriatric team on depression in frail elderly people at home. *BMJ (Clinical research  
ed)* 1996;**313**(7064):1058-61.
19. Bruce ML, Hoff RA. Social and physical health risk factors for first-onset major depressive disorder  
in a community sample. *Soc Psychiatry Psychiatr Epidemiol* 1994;**29**(4):165-71.
20. Zozula R, Rosen RC, Jahn EG, et al. Recognition of sleep disorders in a community-based setting  
following an educational intervention. *Sleep Med* 2005;**6**(1):55-61.
21. Choi NG, Hegel MT, Marti CN, et al. Telehealth problem-solving therapy for depressed low-  
income homebound older adults. *American Journal of Geriatric Psychiatry* 2014;**22**(3):263-71.
22. Gellis ZD, Bruce ML. Problem-solving therapy for subthreshold depression in home healthcare  
patients with cardiovascular disease. *American Journal of Geriatric Psychiatry*  
2010;**18**(6):464-74.
23. Gellis ZD, McGinty J, Tierney L, et al. Randomized controlled trial of problem-solving therapy for  
minor depression in home care. *Research on Social Work Practice* 2008;**18**(6):596-606.
24. Gitlin LN, Harris LF, McCoy MC, et al. A home-based intervention to reduce depressive symptoms  
and improve quality of life in older African Americans: A randomized trial. *Annals of Internal  
Medicine* 2013;**159**(4):243-52.

- 1  
2  
3 25. Kiosses DN, Ravdin LD, Gross JJ, et al. Problem adaptation therapy for older adults with major  
4 depression and cognitive impairment: A randomized clinical trial. *JAMA Psychiatry*  
5 2015;**72**(1):22-30.  
6  
7  
8 26. Kerse N, Hayman KJ, Moyes SA, et al. Home-based activity program for older people with  
9 depressive symptoms: DeLLITE - A randomized controlled trial. *Annals of Family Medicine*  
10 2010;**8**(3):214-23.  
11  
12  
13 27. Pfaff JJ, Alfonso H, Newton RU, et al. ACTIVEDEP: A randomised, controlled trial of a home-  
14 based exercise intervention to alleviate depression in middle-aged and older adults. *British*  
15 *Journal of Sports Medicine* 2014;**48**(3):226-32.  
16  
17  
18 28. Klug G, Hermann G, Fuchs-Nieder B, et al. Effectiveness of home treatment for elderly people  
19 with depression: Randomised controlled trial. *British Journal of Psychiatry* 2010;**197**(6):463-  
20 67.  
21  
22  
23 29. Gellis ZD, McGinty J, Horowitz A, et al. Problem-solving therapy for late-life depression in home  
24 care: A randomized field trial. *American Journal of Geriatric Psychiatry* 2007;**15**(11):968-78.  
25  
26  
27 30. Gary RA, Dunbar SB, Higgins MK, et al. Combined exercise and cognitive behavioral therapy  
28 improves outcomes in patients with heart failure. *Journal of psychosomatic research*  
29 2010;**69**(2):119-31.  
30  
31  
32 31. Chaytor N, Ciechanowski P, Miller JW, et al. Long-term outcomes from the PEARLS randomized  
33 trial for the treatment of depression in patients with epilepsy. *Epilepsy and Behavior*  
34 2011;**20**(3):545-49.  
35  
36  
37 32. Badri R, Sabine M, Robin R, et al. A Spirituality Teaching Program for Depression: A Randomized  
38 Controlled Trial. *International Journal of Psychiatry in Medicine* 2011;**42**(3):315-29.  
39  
40  
41 33. Blumenthal JA, Babyak MA, Doraiswamy PM, et al. Exercise and pharmacotherapy in the  
42 treatment of major depressive disorder. *Psychosomatic medicine* 2007;**69**(7):587-96.  
43  
44  
45 34. Chung L, Tsai P, Liu B, et al. Home-based deep breathing for depression in patients with coronary  
46 heart disease: A randomised controlled trial. *International Journal of Nursing Studies*  
47 2010;**47**(11):1346-53.  
48  
49  
50 35. Ciechanowski P, Chaytor N, Miller J, et al. PEARLS depression treatment for individuals with  
51 epilepsy: A randomized controlled trial. *Epilepsy and Behavior* 2010;**19**(3):225-31.  
52  
53  
54  
55  
56  
57  
58  
59  
60



- 1  
2  
3 36. Ciechanowski P, Wagner E, Schmalting K, et al. Community-Integrated Home-Based Depression  
4 Treatment in Older Adults: A Randomized Controlled Trial. *Journal of the American Medical*  
5 *Association* 2004;**291**(13):1569-77.  
6  
7  
8 37. Naylor EV, Antonuccio DO, Litt M, et al. Bibliotherapy as a treatment for depression in primary  
9 care. *Journal of clinical psychology in medical settings* 2010;**17**(3):258-71.  
10  
11 38. Joling KJ, van Hout HP, van't Veer-Tazelaar PJ, et al. How effective is bibliotherapy for very old  
12 adults with subthreshold depression? A randomized controlled trial. *The American journal of*  
13 *geriatric psychiatry : official journal of the American Association for Geriatric Psychiatry*  
14 2011;**19**(3):256-65.  
15  
16  
17 39. Higgins JPT, Altman DG, Gøtzsche PC, et al. The Cochrane Collaboration's tool for assessing risk  
18 of bias in randomised trials. *BMJ (Clinical research ed)* 2011;**343**.  
19  
20  
21 40. Higgins JPT, Thompson SG, Deeks JJ, et al. Measuring inconsistency in meta-analyses. *BMJ :*  
22 *British Medical Journal* 2003;**327**(7414):557-60.  
23  
24  
25 41. Rickhi B, Moritz S, Reesal R, et al. A spirituality teaching program for depression: a randomized  
26 controlled trial. *International journal of psychiatry in medicine* 2011;**42**(3):315-29.  
27  
28  
29 42. Linde K, Sigterman K, Kriston L, et al. Effectiveness of Psychological Treatments for Depressive  
30 Disorders in Primary Care: Systematic Review and Meta-Analysis. *Annals of Family Medicine*  
31 2015;**13**(1):56-68.  
32  
33  
34 43. Cuijpers P, van Straten A, van Schaik A, et al. Psychological treatment of depression in primary  
35 care: a meta-analysis. *British Journal of General Practice* 2009;**59**(559):e51-e60.  
36  
37  
38 44. Driessen E, Hegelmaier LM, Abbass AA, et al. The efficacy of short-term psychodynamic  
39 psychotherapy for depression: A meta-analysis update. *Clinical psychology review* 2015;**42**:1-  
40 15.  
41  
42  
43 45. Krishna M, Lepping P, Jones S, et al. Systematic review and meta-analysis of group cognitive  
44 behavioural psychotherapy treatment for sub-clinical depression. *Asian journal of psychiatry*  
45 2015;**16**:7-16.  
46  
47  
48 46. Dunn AL, Dishman RK. Exercise and the neurobiology of depression. *Exercise and sport sciences*  
49 *reviews* 1991;**19**:41-98.  
50  
51  
52 47. Craft LL, Perna FM. The Benefits of Exercise for the Clinically Depressed. *Primary Care*  
53 *Companion to The Journal of Clinical Psychiatry* 2004;**6**(3):104-11.  
54  
55  
56  
57  
58  
59  
60

1  
2  
3  
4  
5  
6  
7  
8  
9  
10  
11  
12  
13  
14  
15  
16  
17  
18  
19  
20  
21  
22  
23  
24  
25  
26  
27  
28  
29  
30  
31  
32  
33  
34  
35  
36  
37  
38  
39  
40  
41  
42  
43  
44  
45  
46  
47  
48  
49  
50  
51  
52  
53  
54  
55  
56  
57  
58  
59  
60

48. Bridle C, Spanjers K, Patel S, et al. Effect of exercise on depression severity in older people: systematic review and meta-analysis of randomised controlled trials. The British journal of psychiatry : the journal of mental science 2012;**201**(3):180-5.

For peer review only

Table 1. Characteristics of included studies

| Author                | Setting     | Type of depression        | Participants |            |            |                  |             |                                  |                          | Study's intervention |                  |                                        |
|-----------------------|-------------|---------------------------|--------------|------------|------------|------------------|-------------|----------------------------------|--------------------------|----------------------|------------------|----------------------------------------|
|                       |             |                           | N            | Age (mean) | Female (%) | Living alone (%) | Married (%) | Baseline depression score (mean) | Anti-depressants use (%) | Type of intervention | Duration (weeks) | Comparison                             |
| Kiosses <sup>25</sup> | U.S.        | Major depressive disorder | 74           | 80.91      | 74.3       | NA               | NA          | 21.25 <sup>a</sup>               | 63.51                    | PST-HC               | 12 weeks         | Usual care with home visit             |
| Choi <sup>21</sup>    | U.S.        | Mixed depression          | 121          | 65.21      | 77.7       | 63.6             | NA          | 24.55 <sup>b</sup>               | NA                       | PST-HC               | 12 weeks         | Usual care with telephone support call |
| Gitlin <sup>24</sup>  | New Zealand | Mixed depression          | 208          | 69.57      | 78.4       | 56.8             | 12.0        | 13.01 <sup>c</sup>               | 19.3                     | PST-HC               | 16 weeks         | Usual care                             |
| Klug <sup>28</sup>    | Australia   | Major depressive disorder | 60           | 74.9       | 90.0       | 78.3             | NA          | 8.91 <sup>e</sup>                | 95                       | PST-HC               | 52 weeks         | Usual care                             |
| Gellis <sup>22</sup>  | U.S.        | Minor depression          | 36           | 75.9       | 91.6       | 88.9             | 8.3         | 18.05 <sup>b</sup>               | 0                        | PST-HC               | 6 weeks          | Usual care                             |
| Gellis <sup>29</sup>  | U.S.        | Minor depression          | 62           | 77.67      | 87.5       | 80.0             | 20.0        | 20.52 <sup>a</sup>               | NA                       | PST-HC               | 6 weeks          | Usual care with home visit             |

1  
2  
3  
4  
5  
6  
7  
8  
9  
10  
11  
12  
13  
14  
15  
16  
17  
18  
19  
20  
21  
22  
23  
24  
25  
26  
27  
28  
29  
30  
31  
32  
33  
34  
35  
36  
37  
38  
39  
40  
41  
42  
43  
44  
45  
46  
47  
48  
49

| Author                     | Setting     | Type of depression        | Participants |            |            |                  |             |                                  |                          | Study's intervention                                                        |                  |                            |
|----------------------------|-------------|---------------------------|--------------|------------|------------|------------------|-------------|----------------------------------|--------------------------|-----------------------------------------------------------------------------|------------------|----------------------------|
|                            |             |                           | N            | Age (mean) | Female (%) | Living alone (%) | Married (%) | Baseline depression score (mean) | Anti-depressants use (%) | Type of intervention                                                        | Duration (weeks) | Comparison                 |
| Naylor <sup>37</sup>       | U.S.        | Mixed depression          | 38           | 51.45      | 84.2       | NA               | NA          | 7.9 <sup>f</sup>                 | NA                       | Home-based CBT                                                              | 6 weeks          | Usual care                 |
| Joling <sup>38</sup>       | Netherlands | Minor depression          | 170          | 81.45      | 73.5       | NA               | 29.4        | 21.6                             | NA                       | Home-based CBT                                                              | 12 weeks         | Usual care                 |
| Pfaff <sup>27</sup>        | U.S.        | Mixed depression          | 200          | 60.97      | 63.0       | 21.6             | 53.0        | NA                               | 54.5                     | Home-based exercise                                                         | 12 weeks         | Usual care                 |
| Kerse <sup>26</sup>        | Austria     | Mixed depression          | 193          | 81.1       | 58.5       | 51.8             | NA          | 3.7 <sup>e</sup>                 | 26.4                     | Home-based exercise                                                         | 24 weeks         | Usual care with home visit |
| Blumenthal <sup>33</sup>   | U.S.        | Major depressive disorder | 102          | 52.52      | 74.5       | NA               | NA          | 16.52 <sup>b</sup>               | 0                        | Home-based exercise                                                         | 16 weeks         | Usual care                 |
| Ciechanowski <sup>35</sup> | U.S.        | Mixed depression          | 80           | 43.9       | 52.5       | NA               | 68.8        | 2.00 <sup>d</sup>                | 40%                      | Combined PST-HC with home-based exercise                                    | 19 weeks         | Usual care                 |
| Ciechanowski <sup>36</sup> | U.S.        | Minor depression          | 138          | 73         | 79         | 72.0             | 11.0        | 1.3 <sup>d</sup>                 | 51                       | Combined PST-HC with home-based exercise                                    | 19 weeks         | Usual care                 |
| Banerjee <sup>18</sup>     | Taiwan      | Mixed depression          | 69           | 80.71      | 82.9       | 78.3             | 15.9        | 26.25 <sup>a</sup>               | 11.39                    | Combined family therapy, bereavement counselling, social interventions with | 24 weeks         | Usual care                 |

1  
2  
3  
4  
5  
6  
7  
8  
9  
10  
11  
12  
13  
14  
15  
16  
17  
18  
19  
20  
21  
22  
23  
24  
25  
26  
27  
28  
29  
30  
31  
32  
33  
34  
35  
36  
37  
38  
39  
40  
41  
42  
43  
44  
45  
46  
47  
48  
49

| Author               | Setting | Type of depression        | Participants |            |            |                  |             |                                  |                          | Study's intervention                                                                  |                  |                                        |
|----------------------|---------|---------------------------|--------------|------------|------------|------------------|-------------|----------------------------------|--------------------------|---------------------------------------------------------------------------------------|------------------|----------------------------------------|
|                      |         |                           | N            | Age (mean) | Female (%) | Living alone (%) | Married (%) | Baseline depression score (mean) | Anti-depressants use (%) | Type of intervention                                                                  | Duration (weeks) | Comparison                             |
|                      |         |                           |              |            |            |                  |             |                                  |                          | home-based exercise                                                                   |                  |                                        |
| Gary <sup>30</sup>   | U.S.    | Mixed depression          | 74           | 65.8       | 57.1       | NA               | 39.2        | 20.7 <sup>f</sup>                | 29.7                     | Home-based CBT, home-based exercise, combined home-based CBT with home-based exercise | 12 weeks         | Usual care                             |
| Rickhi <sup>41</sup> | U.K.    | Major depressive disorder | 84           | 44.05      | 77.4       | NA               | 58.3        | 20.35 <sup>b</sup>               | 0                        | Spiritual teaching program                                                            | 8 weeks          | Usual care                             |
| Chung <sup>34</sup>  | U.S.    | Mixed depression          | 62           | 71.50      | 30.6       | NA               | NA          | 7.53 <sup>c</sup>                | 1.61                     | Home-based deep breathing exercise                                                    | 4 weeks          | Usual care with telephone support call |

<sup>a</sup>MADRS; <sup>b</sup>HAMD; <sup>c</sup>PHQ-9; <sup>d</sup>HSCL-20; <sup>e</sup>GDS; <sup>f</sup>BDI

PST-HC, problem solving therapy-home care; CBT, cognitive behavioural therapy

**Table 2.** Mean difference of depression score after treatment between intervention and control groups

| Author                                                 | Year | Follow up<br>time | Intervention |       |      | Control |       |      | Mean difference<br>(95% CI) |
|--------------------------------------------------------|------|-------------------|--------------|-------|------|---------|-------|------|-----------------------------|
|                                                        |      |                   | N            | Mean  | SD   | N       | Mean  | SD   |                             |
| <i>Home-based Psychological intervention</i>           |      |                   |              |       |      |         |       |      |                             |
| Kiosses <sup>25</sup>                                  | 2015 | 12 weeks          | 37           | 10.6  | 6.08 | 37      | 15.6  | 6.81 | -0.77 (0.30, -1.25)         |
| Choi <sup>21</sup>                                     | 2014 | 12 weeks          | 35           | 14.44 | 7.04 | 31      | 19.16 | 7.02 | -0.67 (-1.17, -0.17)        |
| Gitlin <sup>24</sup>                                   | 2013 | 16 weeks          | 106          | 6.4   | 6.18 | 102     | 8.9   | 6.06 | -0.41 (-0.13, -0.68)        |
| Joling <sup>38</sup>                                   | 2011 | 12 weeks          | 86           | 16.60 | 6.41 | 84      | 17.27 | 6.53 | -0.10 (-0.40, 0.20)         |
| Gary <sup>30</sup>                                     | 2010 | 12 weeks          | 17           | 8.2   | 6.3  | 15      | 9.3   | 4.9  | 0.19 (0.50, -0.89)          |
| Gellis <sup>22</sup>                                   | 2010 | 6 weeks           | 18           | 11.4  | 8.3  | 18      | 17.3  | 8.1  | 0.72 (-0.04, -1.39)         |
| Klug <sup>28</sup>                                     | 2010 | 48 weeks          | 29           | 6.11  | 3.00 | 29      | 10.43 | 4.2  | -1.18 (-0.62, -1.74)        |
| Naylor <sup>37</sup>                                   | 2010 | 6 weeks           | 15           | 4.40  | 5.30 | 18      | 4.90  | 5.30 | -0.09 (-0.78, 0.59)         |
| Gellis <sup>29</sup>                                   | 2007 | 6 weeks           | 30           | 8.11  | 4.3  | 32      | 13.64 | 5.6  | 1.10 (-0.57, -1.64)         |
| <b>SMD (95% CI)</b>                                    |      |                   |              |       |      |         |       |      | <b>-0.57 (-0.84, -0.31)</b> |
| <i>Home-based Exercise</i>                             |      |                   |              |       |      |         |       |      |                             |
| Kerse <sup>26</sup>                                    | 2010 | 24 weeks          | 94           | 2.4   | 0.2  | 92      | 3.1   | 0.3  | -2.75 (-2.35, -3.15)        |
| Gary <sup>30</sup>                                     | 2010 | 12 weeks          | 18           | 8.4   | 5.6  | 15      | 9.3   | 4.9  | -0.17 (0.52, -0.86)         |
| Blumenthal <sup>33</sup>                               | 2007 | 16 weeks          | 53           | 9.5   | 7.43 | 49      | 10.5  | 5.36 | -0.15 (0.24, -0.54)         |
| <b>SMD (95% CI)</b>                                    |      |                   |              |       |      |         |       |      | <b>-1.03 (-2.89, 0.82)</b>  |
| <i>Combine psychological intervention and exercise</i> |      |                   |              |       |      |         |       |      |                             |
| Gary <sup>30</sup>                                     | 2010 | 12 weeks          | 16           | 6.5   | 3.7  | 15      | 9.3   | 4.9  | -0.65 (0.08, -1.37)         |
| Ciechanowski <sup>36</sup>                             | 2004 | 24 weeks          | 72           | 0.71  | 0.6  | 66      | 1.17  | 0.53 | -0.81 (-0.46, -1.16)        |
| <b>SMD (95% CI)</b>                                    |      |                   |              |       |      |         |       |      | <b>-0.78 (-1.09, -0.47)</b> |

CI, confidence interval; SD, standard deviation; SMD, standardized mean difference

**Table 3.** Risk ratios of incidence of remission between intervention and control groups

| Author                                    | Year | Follow up time | Intervention |              | Control   |              | RR (95% CI)              |
|-------------------------------------------|------|----------------|--------------|--------------|-----------|--------------|--------------------------|
|                                           |      |                | Remission    | No Remission | Remission | No Remission |                          |
| <i>Home-based psychotherapy</i>           |      |                |              |              |           |              |                          |
| Kiosses <sup>25</sup>                     | 2015 | 12 weeks       | 14           | 23           | 5         | 32           | 2.80 (1.12, 6.98)        |
| Gitlin <sup>24</sup>                      | 2013 | 16 weeks       | 39           | 50           | 25        | 68           | 1.63 (1.08, 2.46)        |
| Joling <sup>38</sup>                      | 2011 | 12 weeks       | 31           | 55           | 25        | 59           | 1.47 (0.84, 2.55)        |
| Naylor <sup>37</sup>                      | 2010 | 6 weeks        | 11           | 4            | 9         | 9            | 1.21 (0.79, 1.87)        |
| <b>Pooled RR (95% CI)</b>                 |      |                |              |              |           |              | <b>1.53 (1.19, 1.98)</b> |
| <i>Home-based Exercise</i>                |      |                |              |              |           |              |                          |
| Ptaff <sup>27</sup>                       | 2014 | 12 weeks       | 49           | 29           | 40        | 28           | 1.07 (0.82-1.39)         |
| Blumenthal <sup>33</sup>                  | 2007 | 16 weeks       | 21           | 32           | 23        | 26           | 0.84 (0.54-1.32)         |
| <b>Pooled RR (95% CI)</b>                 |      |                |              |              |           |              | <b>0.99 (0.79, 1.24)</b> |
| <i>Combine psychotherapy and exercise</i> |      |                |              |              |           |              |                          |
| Ciechanowski <sup>35</sup>                | 2010 | 19 weeks       | 4            | 36           | 0         | 40           | 9.00 (0.50-161.86)       |
| Ciechanowski <sup>36</sup>                | 2004 | 19 weeks       | 30           | 42           | 6         | 60           | 4.58 (2.04-10.31)        |
| Banerjee <sup>18</sup>                    | 1996 | 24 weeks       | 19           | 10           | 9         | 23           | 2.33 (1.26-4.30)         |
| <b>Pooled RR (95% CI)</b>                 |      |                |              |              |           |              | <b>3.47 (2.11, 5.70)</b> |

CI, confidence interval; RR, risk ratio

1  
2  
3  
4  
5  
6  
7  
8  
9  
10  
11  
12  
13  
14  
15  
16  
17  
18  
19  
20  
21  
22  
23  
24  
25  
26  
27  
28  
29  
30  
31  
32  
33  
34  
35  
36  
37  
38  
39  
40  
41  
42  
43  
44  
45  
46  
47  
48  
49  
50  
51  
52  
53  
54  
55  
56  
57  
58  
59  
60

**Figure legends**

Figure 1. Flow chart of study selection

Figure 2. Network meta-analysis of disease remission among home-based interventions

For peer review only



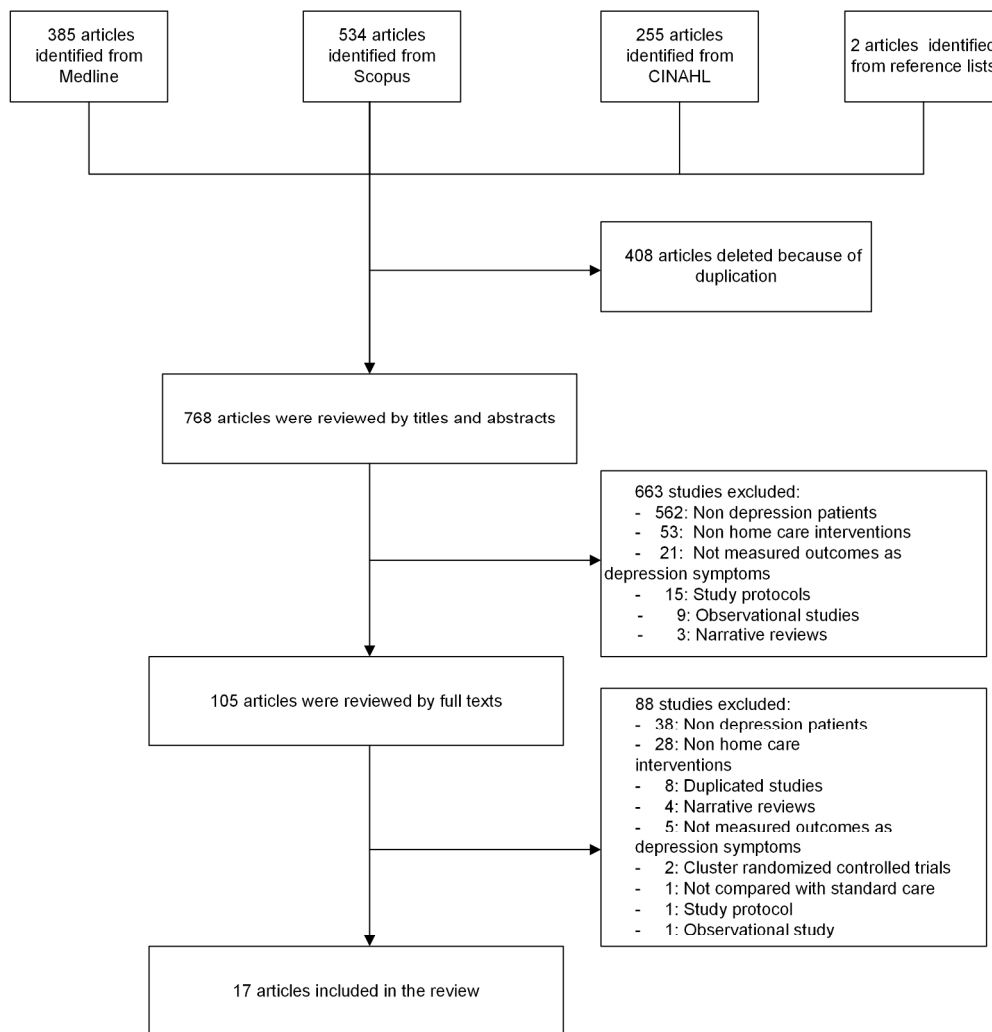

Figure 1. Flow chart of study selection

206x212mm (300 x 300 DPI)

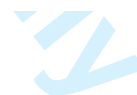

1  
2  
3  
4  
5  
6  
7  
8  
9  
10  
11  
12  
13  
14  
15  
16  
17  
18  
19  
20  
21  
22  
23  
24  
25  
26  
27  
28  
29  
30  
31  
32  
33  
34  
35  
36  
37  
38  
39  
40  
41  
42  
43  
44  
45  
46  
47  
48  
49  
50  
51  
52  
53  
54  
55  
56  
57  
58  
59  
60

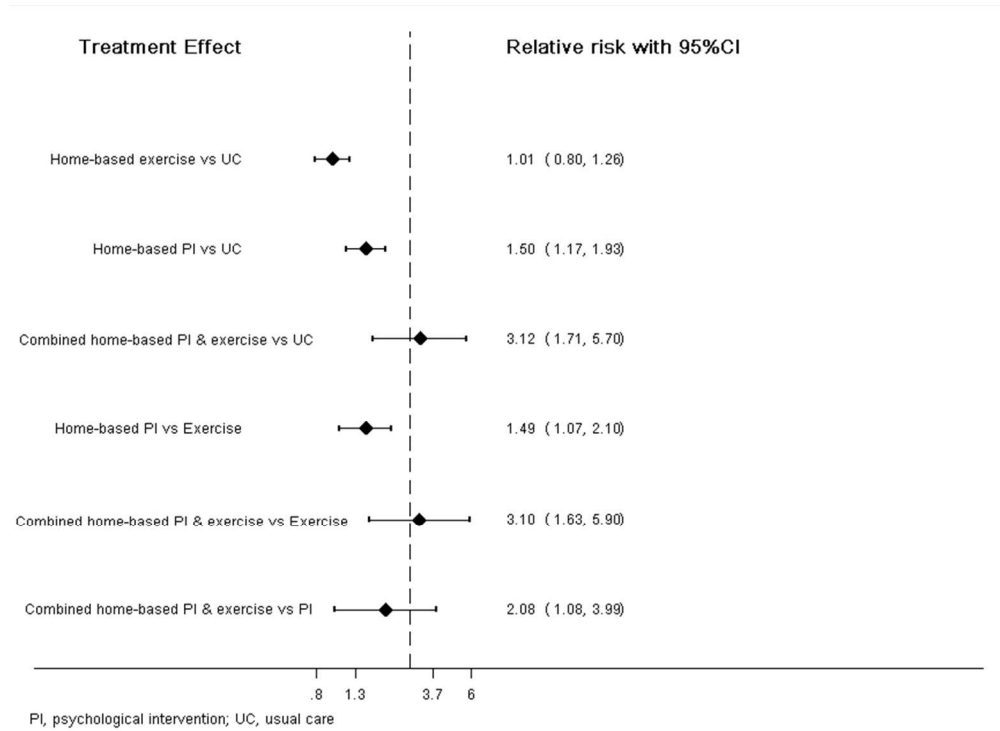

Figure 2. Network meta-analysis of disease remission among home-based interventions

305x222mm (72 x 72 DPI)

View only

Supplementary Table 1. Risk of bias assessment

| Author (Year) | Year | Random sequence generation | Allocation concealment | Blinding of participants and personnel | Blinding of outcome assessors | Incomplete outcome data | Selective outcome reporting | Other bias |
|---------------|------|----------------------------|------------------------|----------------------------------------|-------------------------------|-------------------------|-----------------------------|------------|
| Rickhi        | 2011 | Low                        | Low                    | High                                   | Low                           | Low                     | Low                         | Low        |
| Banerjee      | 1996 | Low                        | Unclear                | High                                   | Low                           | Low                     | Low                         | Low        |
| Blumenthal    | 2007 | Low                        | Low                    | High                                   | Low                           | Low                     | Low                         | Low        |
| Choi          | 2014 | Unclear                    | Unclear                | High                                   | Unclear                       | High                    | Low                         | Low        |
| Chung         | 2010 | Low                        | Low                    | High                                   | unclear                       | High                    | Low                         | Low        |
| Ciechanowski  | 2010 | Low                        | Low                    | High                                   | Low                           | Low                     | High                        | Low        |
| Ciechanowski  | 2004 | Low                        | Low                    | High                                   | Unclear                       | Low                     | Low                         | Low        |
| Gary          | 2010 | Unclear                    | Unclear                | High                                   | Low                           | Low                     | Low                         | Low        |
| Gellis        | 2010 | Unclear                    | Unclear                | High                                   | Low                           | Low                     | Low                         | Low        |
| Gellis        | 2008 | Low                        | Unclear                | High                                   | Low                           | Low                     | Low                         | Low        |
| Gitlin        | 2013 | Low                        | Low                    | High                                   | Unclear                       | Low                     | Low                         | Low        |
| Kerse         | 2010 | Low                        | Unclear                | High                                   | Low                           | Low                     | Low                         | Low        |
| Kiosses       | 2015 | Low                        | Unclear                | High                                   | Low                           | Low                     | Low                         | Low        |
| Klug          | 2010 | Low                        | Unclear                | High                                   | Unclear                       | High                    | Low                         | Low        |
| Pfaff         | 2014 | Low                        | Unclear                | High                                   | Low                           | Low                     | Low                         | Low        |
| Joling        | 2011 | Low                        | Unclear                | High                                   | Unclear                       | Low                     | Low                         | Low        |
| Naylor        | 2010 | Low                        | Unclear                | High                                   | Unclear                       | High                    | Low                         | Low        |

**Supplementary Figure legends**

**Supplementary Figure 1.** Pooled standardized mean difference between home-based psychological intervention and usual care according to severities of depression

**Supplementary Figure 2.** Pooled standardized mean difference between home-based exercise, combined psychological intervention with exercise and usual care

**Supplementary Figure 3.** Pooled risk ratio of disease remission between home-based psychological intervention and usual care

**Supplementary Figure 4.** Pooled risk ratio of disease remission between home-based exercise, combined psychological intervention with exercise and usual care

**Supplementary Figure 5.** Network plot of all available home-based interventions

**Supplementary Figure 6.** Funnel plots of home-based psychological intervention and home-based exercise

**Supplementary Figure 7.** Funnel and contour enhanced funnel plot of combined psychological intervention with exercise

Supplementary Figure 1

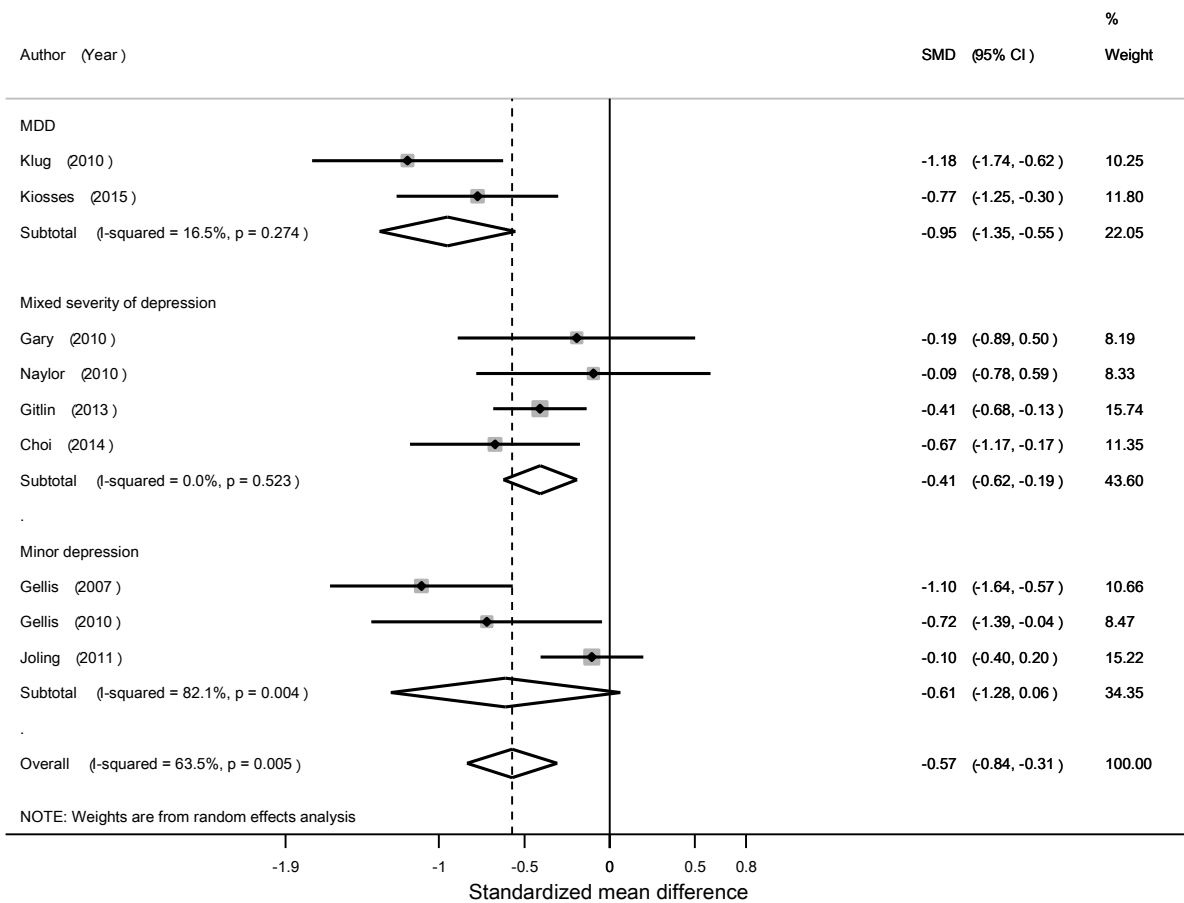

Supplementary Figure 2

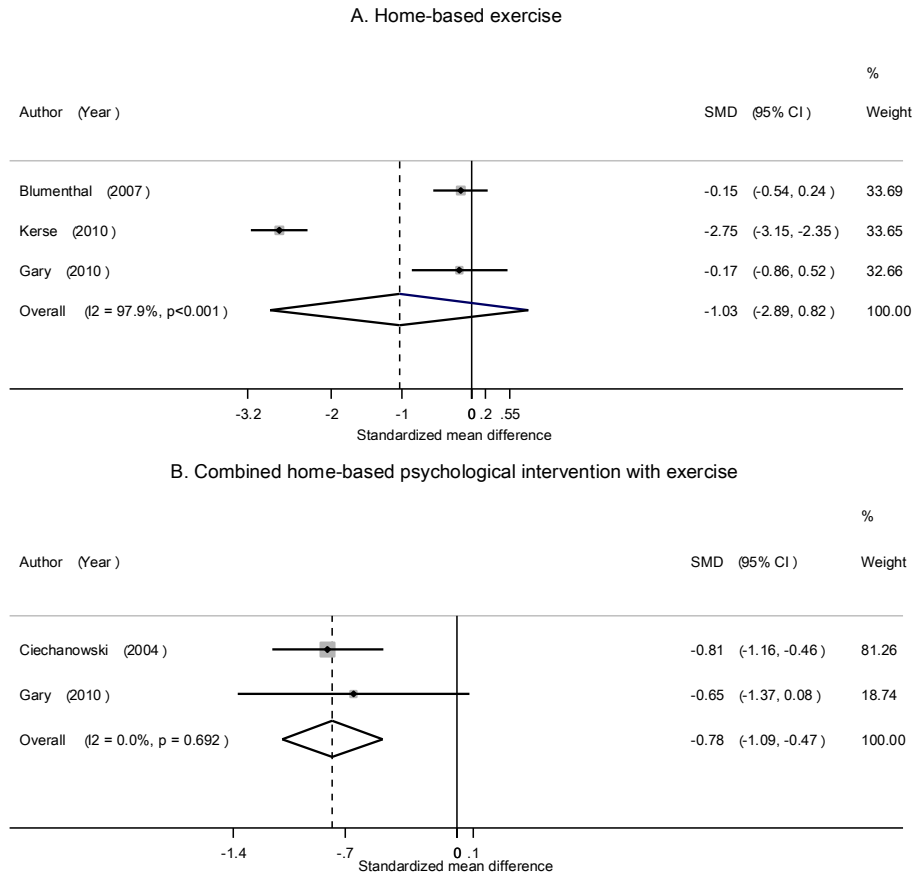

Review only

Supplementary Figure 3

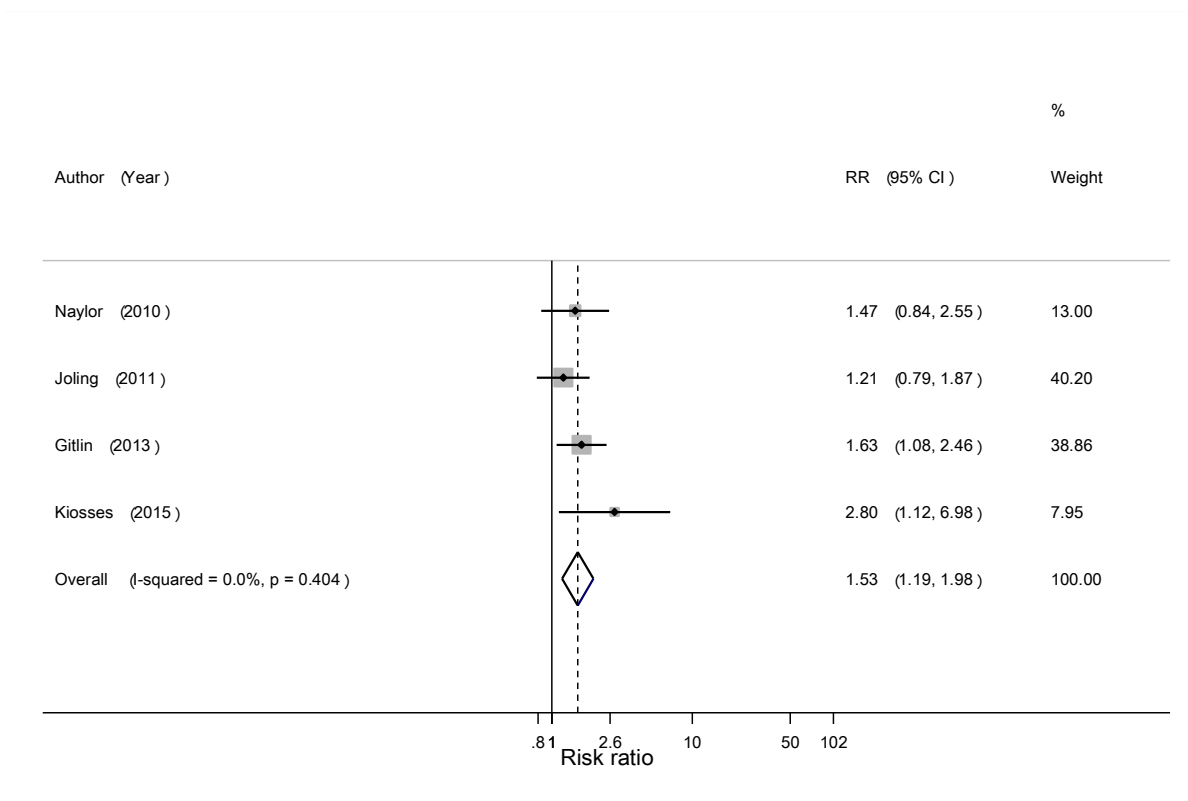

Review only

Supplementary Figure 4

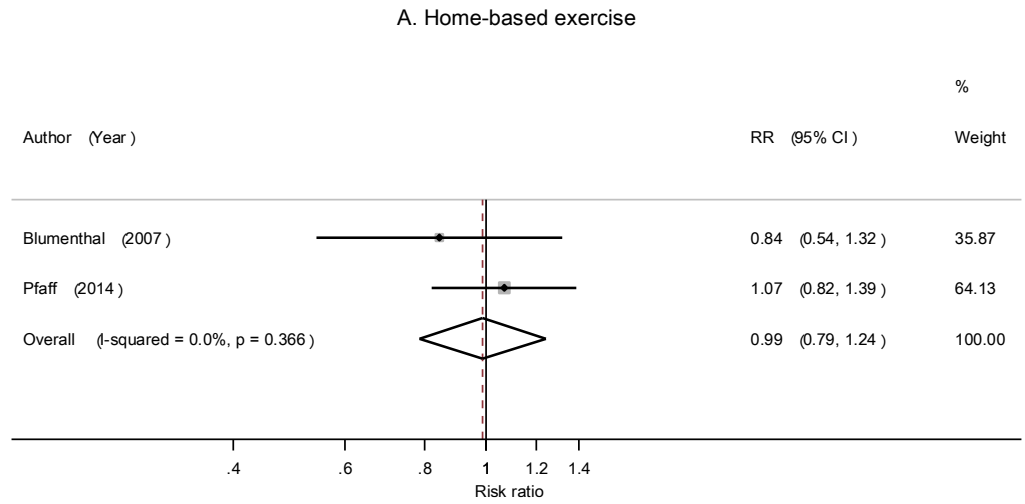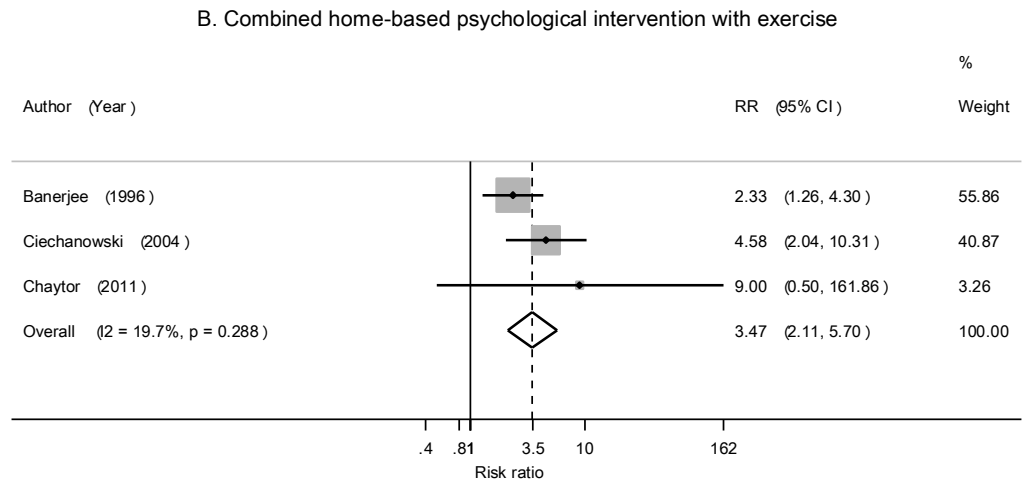



Supplementary Figure 5

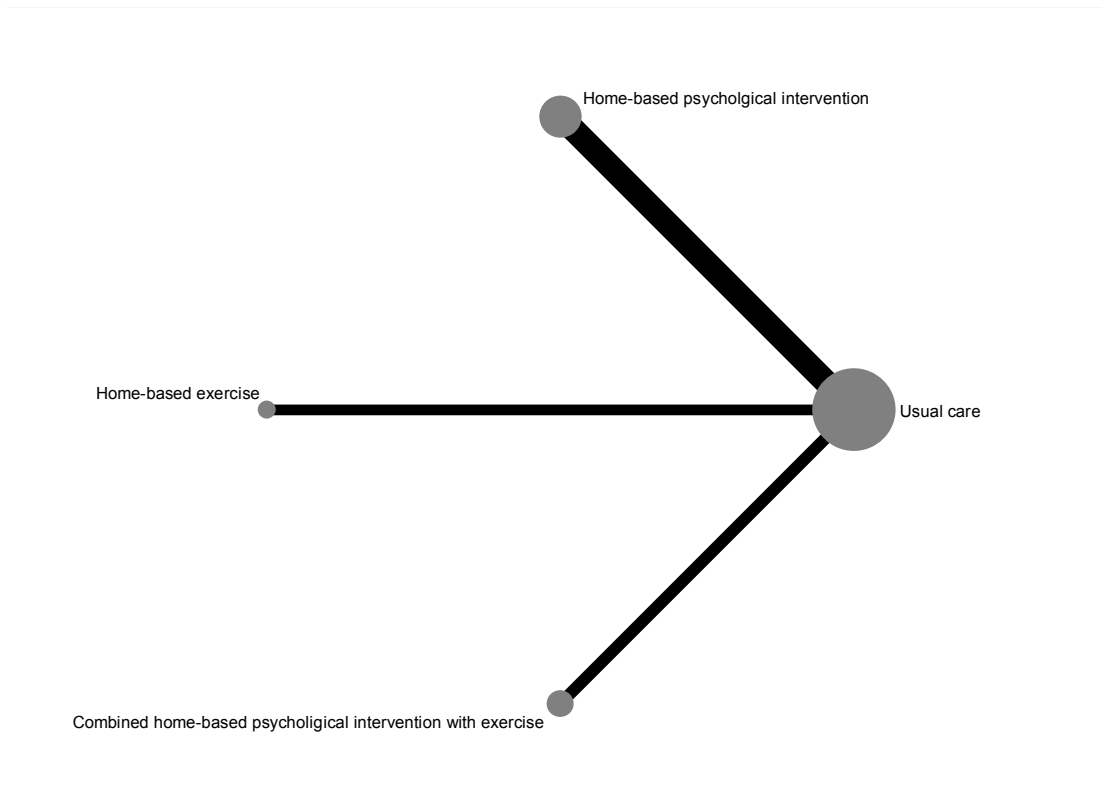

Review only

1  
2  
3  
4  
5  
6  
7  
8  
9  
10  
11  
12  
13  
14  
15  
16  
17  
18  
19  
20  
21  
22  
23  
24  
25  
26  
27  
28  
29  
30  
31  
32  
33  
34  
35  
36  
37  
38  
39  
40  
41  
42  
43  
44  
45  
46  
47  
48  
49  
50  
51  
52  
53  
54  
55  
56  
57  
58  
59  
60

1  
2  
3  
4  
5  
6  
7  
8  
9  
10  
11  
12  
13  
14  
15  
16  
17  
18  
19  
20  
21  
22  
23  
24  
25  
26  
27  
28  
29  
30  
31  
32  
33  
34  
35  
36  
37  
38  
39  
40  
41  
42  
43  
44  
45  
46  
47  
48  
49  
50  
51  
52  
53  
54  
55  
56  
57  
58  
59  
60

Supplementary Figure 6

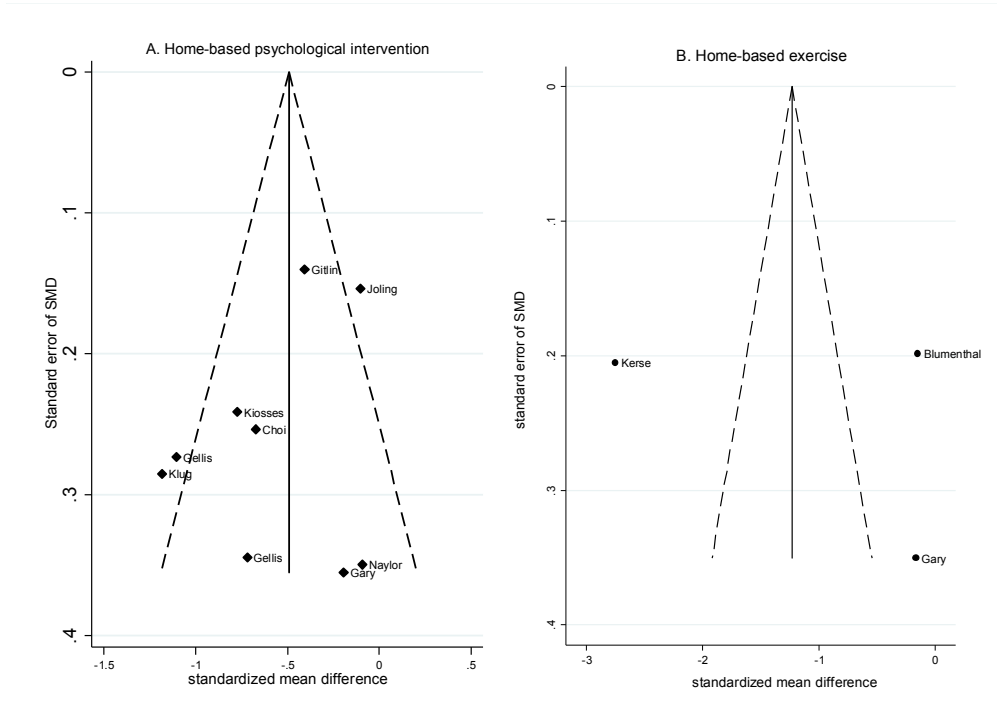

review only

Supplementary Figure 7

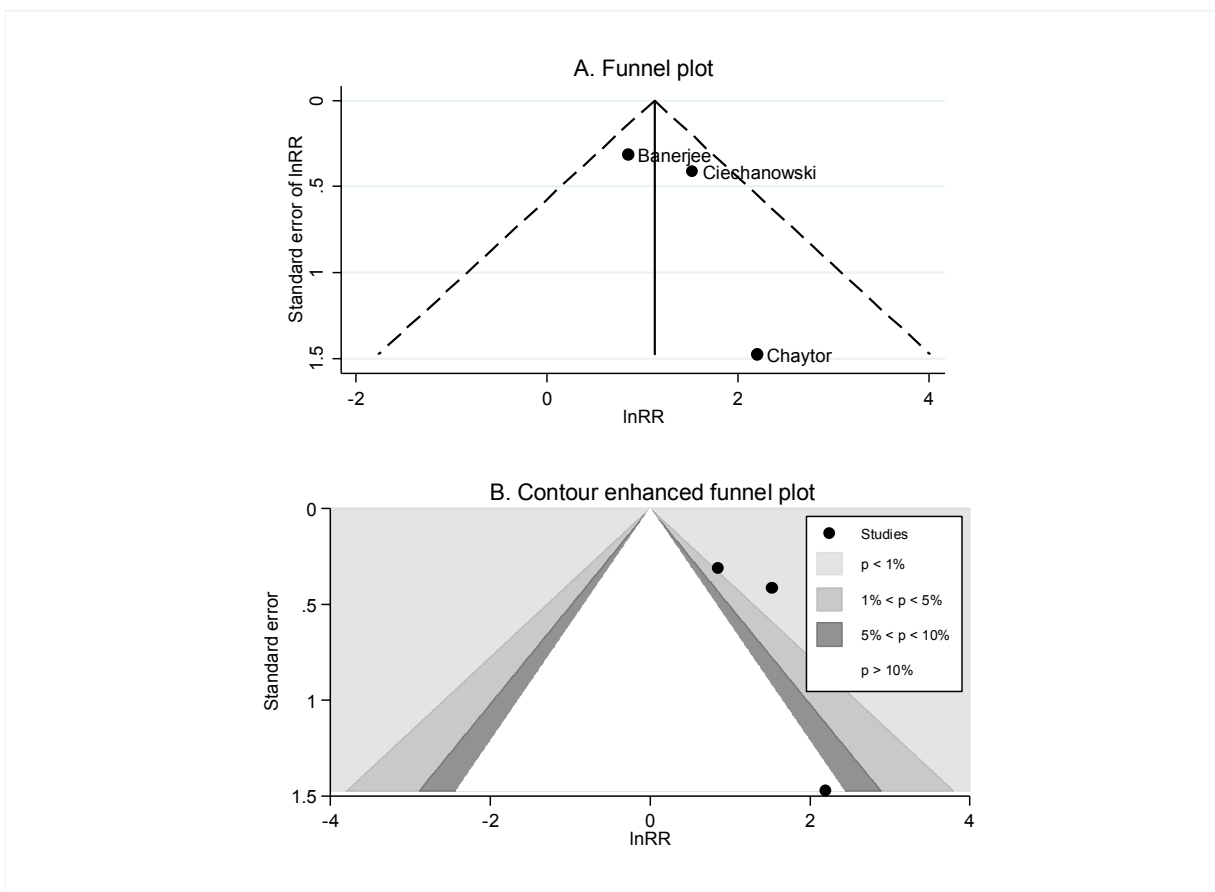

Review only

1  
2  
3  
4  
5  
6  
7  
8  
9  
10  
11  
12  
13  
14  
15  
16  
17  
18  
19  
20  
21  
22  
23  
24  
25  
26  
27  
28  
29  
30  
31  
32  
33  
34  
35  
36  
37  
38  
39  
40  
41  
42  
43  
44  
45  
46  
47  
48  
49  
50  
51  
52  
53  
54  
55  
56  
57  
58  
59  
60

## Supplementary Appendix

### Search strategy for Medline

(Depressive OR depression OR depressed) AND ("Home Care Services"[MeSH] OR "Home Care Agencies"[MeSH] OR "Home Nursing"[MeSH] OR "House Calls"[MeSH] OR "Community Health Planning"[MeSH] OR "Health Systems Agencies"[MeSH] OR "Community Health Nursing"[MeSH] OR "Social Support"[MeSH]) OR ("Home Based" OR "home support" OR ("home treatment" OR "home treatments") OR "home care" OR ("home visits" OR "Home visit") OR ("Health visits" OR "Health visit") OR ("home service" OR "home services")) Filters: Randomized Controlled Trial

### Search strategy for Scopus

(Depressive OR depression OR depressed) AND ("Home Based" OR "home support" OR ("home treatment" OR "home treatments") OR "home care" OR ("home visits" OR "Home visit") OR ("Health visits" OR "Health visit") OR ("home service" OR "home services") OR "home health care")

CINAHL

### Search strategy for CINAHL

(depressive OR depression OR depressed) AND ("Home Based" OR "home support" OR ("home treatment" OR "home treatments") OR "home care" OR ("home visits" OR "Home visit") OR ("Health visits" OR "Health visit") OR ("home service" OR "home services") OR "home health care") AND (randomized OR randomized)

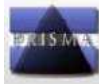

# PRISMA 2009 Checklist

| Section/topic                      | #  | Checklist item                                                                                                                                                                                                                                                                                              | Reported on page #     |
|------------------------------------|----|-------------------------------------------------------------------------------------------------------------------------------------------------------------------------------------------------------------------------------------------------------------------------------------------------------------|------------------------|
| <b>TITLE</b>                       |    |                                                                                                                                                                                                                                                                                                             |                        |
| Title                              | 1  | Identify the report as a systematic review, meta-analysis, or both.                                                                                                                                                                                                                                         | 1                      |
| <b>ABSTRACT</b>                    |    |                                                                                                                                                                                                                                                                                                             |                        |
| Structured summary                 | 2  | Provide a structured summary including, as applicable: background; objectives; data sources; study eligibility criteria, participants, and interventions; study appraisal and synthesis methods; results; limitations; conclusions and implications of key findings; systematic review registration number. | 3                      |
| <b>INTRODUCTION</b>                |    |                                                                                                                                                                                                                                                                                                             |                        |
| Rationale                          | 3  | Describe the rationale for the review in the context of what is already known.                                                                                                                                                                                                                              | 5                      |
| Objectives                         | 4  | Provide an explicit statement of questions being addressed with reference to participants, interventions, comparisons, outcomes, and study design (PICOS).                                                                                                                                                  | 5, 6                   |
| <b>METHODS</b>                     |    |                                                                                                                                                                                                                                                                                                             |                        |
| Protocol and registration          | 5  | Indicate if a review protocol exists, if and where it can be accessed (e.g., Web address), and, if available, provide registration information including registration number.                                                                                                                               | -                      |
| Eligibility criteria               | 6  | Specify study characteristics (e.g., PICOS, length of follow-up) and report characteristics (e.g., years considered, language, publication status) used as criteria for eligibility, giving rationale.                                                                                                      | 6, 7                   |
| Information sources                | 7  | Describe all information sources (e.g., databases with dates of coverage, contact with study authors to identify additional studies) in the search and date last searched.                                                                                                                                  | 6                      |
| Search                             | 8  | Present full electronic search strategy for at least one database, including any limits used, such that it could be repeated.                                                                                                                                                                               | Supplementary Appendix |
| Study selection                    | 9  | State the process for selecting studies (i.e., screening, eligibility, included in systematic review, and, if applicable, included in the meta-analysis).                                                                                                                                                   | 6                      |
| Data collection process            | 10 | Describe method of data extraction from reports (e.g., piloted forms, independently, in duplicate) and any processes for obtaining and confirming data from investigators.                                                                                                                                  | 7                      |
| Data items                         | 11 | List and define all variables for which data were sought (e.g., PICOS, funding sources) and any assumptions and simplifications made.                                                                                                                                                                       | 7                      |
| Risk of bias in individual studies | 12 | Describe methods used for assessing risk of bias of individual studies (including specification of whether this was done at the study or outcome level), and how this information is to be used in any data synthesis.                                                                                      | 8                      |
| Summary measures                   | 13 | State the principal summary measures (e.g., risk ratio, difference in means).                                                                                                                                                                                                                               | 8                      |
| Synthesis of results               | 14 | Describe the methods of handling data and combining results of studies, if done, including measures of consistency (e.g., $I^2$ ) for each meta-analysis.                                                                                                                                                   | 8                      |

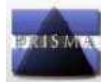

# PRISMA 2009 Checklist

Page 1 of 2

| Section/topic                 | #  | Checklist item                                                                                                                                                                                           | Reported on page #                                          |
|-------------------------------|----|----------------------------------------------------------------------------------------------------------------------------------------------------------------------------------------------------------|-------------------------------------------------------------|
| Risk of bias across studies   | 15 | Specify any assessment of risk of bias that may affect the cumulative evidence (e.g., publication bias, selective reporting within studies).                                                             | 9                                                           |
| Additional analyses           | 16 | Describe methods of additional analyses (e.g., sensitivity or subgroup analyses, meta-regression), if done, indicating which were pre-specified.                                                         | 8                                                           |
| <b>RESULTS</b>                |    |                                                                                                                                                                                                          |                                                             |
| Study selection               | 17 | Give numbers of studies screened, assessed for eligibility, and included in the review, with reasons for exclusions at each stage, ideally with a flow diagram.                                          | 9, Figure 1                                                 |
| Study characteristics         | 18 | For each study, present characteristics for which data were extracted (e.g., study size, PICOS, follow-up period) and provide the citations.                                                             | 9, 10, 11, 12 & Table 1                                     |
| Risk of bias within studies   | 19 | Present data on risk of bias of each study and, if available, any outcome level assessment (see item 12).                                                                                                | 12 & Supplementary Table 1                                  |
| Results of individual studies | 20 | For all outcomes considered (benefits or harms), present, for each study: (a) simple summary data for each intervention group (b) effect estimates and confidence intervals, ideally with a forest plot. | Tables 2 & 3<br>Figure 2<br>Supplementary Figure 1, 2, 3, 4 |
| Synthesis of results          | 21 | Present results of each meta-analysis done, including confidence intervals and measures of consistency.                                                                                                  | 12-16                                                       |
| Risk of bias across studies   | 22 | Present results of any assessment of risk of bias across studies (see Item 15).                                                                                                                          | 16                                                          |
| Additional analysis           | 23 | Give results of additional analyses, if done (e.g., sensitivity or subgroup analyses, meta-regression [see Item 16]).                                                                                    | 12-16                                                       |
| <b>DISCUSSION</b>             |    |                                                                                                                                                                                                          |                                                             |
| Summary of evidence           | 24 | Summarize the main findings including the strength of evidence for each main outcome; consider their relevance to key groups (e.g., healthcare providers, users, and policy makers).                     | 16-19                                                       |
| Limitations                   | 25 | Discuss limitations at study and outcome level (e.g., risk of bias), and at review-level (e.g., incomplete retrieval of identified research, reporting bias).                                            | 18                                                          |
| Conclusions                   | 26 | Provide a general interpretation of the results in the context of other evidence, and implications for future research.                                                                                  | 19                                                          |
| <b>FUNDING</b>                |    |                                                                                                                                                                                                          |                                                             |

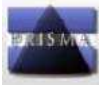

# PRISMA 2009 Checklist

|           |    |                                                                                                                                            |    |
|-----------|----|--------------------------------------------------------------------------------------------------------------------------------------------|----|
| 4 Funding | 27 | Describe sources of funding for the systematic review and other support (e.g., supply of data); role of funders for the systematic review. | 19 |
|-----------|----|--------------------------------------------------------------------------------------------------------------------------------------------|----|

7  
8 *From:* Moher D, Liberati A, Tetzlaff J, Altman DG, The PRISMA Group (2009). Preferred Reporting Items for Systematic Reviews and Meta-Analyses: The PRISMA Statement. PLoS Med 6(6): e1000097. doi:10.1371/journal.pmed1000097

9 For more information, visit: [www.prisma-statement.org](http://www.prisma-statement.org).

10  
11 Page 2 of 2

12  
13  
14  
15  
16  
17  
18  
19  
20  
21  
22  
23  
24  
25  
26  
27  
28  
29  
30  
31  
32  
33  
34  
35  
36  
37  
38  
39  
40  
41  
42  
43  
44  
45  
46  
47  
48  
49

For peer review only

# BMJ Open

## Efficacy of home-based non-pharmacological interventions for treating depression: a systematic review and network meta-analysis of randomized-controlled trials

|                                 |                                                                                                                                                                                                                                                                                                                                                                                                                                                                                                                                                                                                                                                                                |
|---------------------------------|--------------------------------------------------------------------------------------------------------------------------------------------------------------------------------------------------------------------------------------------------------------------------------------------------------------------------------------------------------------------------------------------------------------------------------------------------------------------------------------------------------------------------------------------------------------------------------------------------------------------------------------------------------------------------------|
| Journal:                        | <i>BMJ Open</i>                                                                                                                                                                                                                                                                                                                                                                                                                                                                                                                                                                                                                                                                |
| Manuscript ID                   | bmjopen-2016-014499.R1                                                                                                                                                                                                                                                                                                                                                                                                                                                                                                                                                                                                                                                         |
| Article Type:                   | Research                                                                                                                                                                                                                                                                                                                                                                                                                                                                                                                                                                                                                                                                       |
| Date Submitted by the Author:   | 07-Mar-2017                                                                                                                                                                                                                                                                                                                                                                                                                                                                                                                                                                                                                                                                    |
| Complete List of Authors:       | Sukhato, Kanokporn; Faculty of Medicine, Ramathibodi Hospital, Mahidol university, Department of Family Medicine<br>Lotrakul, Manoch; Faculty of Medicine, Ramathibodi Hospital, Mahidol university, Department of Psychiatry<br>Dellow, Alan; Faculty of Medicine, Ramathibodi Hospital, Mahidol university<br>Ittasakul, Pichai ; Faculty of Medicine, Ramathibodi Hospital, Mahidol university, Department of Psychiatry<br>Thakkinstian, Ammarin; Faculty of Medicine Ramathibodi Hospital, Mahidol University, Section for Clinical Epidemiology and Biostatistics<br>Anothaisintawee, Thunyarat; Ramathibodi Hospital, Mahidol University, Department of family medicine |
| <b>Primary Subject Heading</b>: | Mental health                                                                                                                                                                                                                                                                                                                                                                                                                                                                                                                                                                                                                                                                  |
| Secondary Subject Heading:      | Evidence based practice, General practice / Family practice                                                                                                                                                                                                                                                                                                                                                                                                                                                                                                                                                                                                                    |
| Keywords:                       | depression, treatment, home-based intervention, systematic review, network meta-analysis                                                                                                                                                                                                                                                                                                                                                                                                                                                                                                                                                                                       |
|                                 |                                                                                                                                                                                                                                                                                                                                                                                                                                                                                                                                                                                                                                                                                |

SCHOLARONE™  
Manuscripts



1  
2  
3 **Efficacy of home-based non-pharmacological interventions for treating depression:**  
4 **a systematic review and network meta-analysis of randomized-controlled trials**  
5  
6  
7

8 Kanokporn Sukhato, M.D.

9  
10 Department of Family Medicine, Faculty of Medicine, Ramathibodi Hospital, Mahidol University,  
11 Bangkok, Thailand  
12

13  
14  
15 Manote Lotrakul, M.D.

16  
17 Department of Psychiatry, Faculty of Medicine, Ramathibodi Hospital, Mahidol University, Bangkok,  
18 Thailand  
19  
20

21  
22  
23 Alan Dellow, M.Med.Ed, FRCGP

24 Faculty of Medicine, Ramathibodi Hospital, Mahidol University, Bangkok, Thailand  
25  
26  
27

28  
29 Pichai Ittasakul, M.D.

30 Department of Psychiatry, Faculty of Medicine, Ramathibodi Hospital, Mahidol University, Bangkok,  
31 Thailand  
32  
33

34  
35  
36 Ammarin Thakkinstian, Ph.D.

37  
38 Section for Clinical Epidemiology & Biostatistics, Faculty of Medicine, Ramathibodi Hospital, Mahidol  
39 University, Bangkok, Thailand  
40  
41

42  
43  
44 Thunyarat Anothaisintawee, M.D., Ph.D.

45 Department of Family Medicine, Faculty of Medicine, Ramathibodi Hospital, Mahidol University,  
46 Bangkok, Thailand  
47  
48

49  
50  
51 **Corresponding author:** Thunyarat Anothaisintawee

52  
53 **Postal address:** Department of Family Medicine, Ramathibodi Hospital, 270 Rama VI Road,  
54 Ratchatewi, Bangkok, Thailand 10400  
55

56 **Tel:** +6622011406  
57  
58  
59  
60

1  
2  
3 **Fax:** +6622011486

4 **Email:** [thunyarat.ano@mahidol.ac.th](mailto:thunyarat.ano@mahidol.ac.th)

5  
6 **Key words:** depression; treatment; home-based intervention; systematic review; network meta-  
7  
8 analysis  
9

10 **Word count:** 5,551 words  
11  
12  
13  
14  
15  
16  
17  
18  
19  
20  
21  
22  
23  
24  
25  
26  
27  
28  
29  
30  
31  
32  
33  
34  
35  
36  
37  
38  
39  
40  
41  
42  
43  
44  
45  
46  
47  
48  
49  
50  
51  
52  
53  
54  
55  
56  
57  
58  
59  
60

For peer review only

**Abstract:**

**Objectives:** To systematically review and compare the efficacy of all available home-based non-pharmacological treatments of depression.

**Design:** Systematic review and network meta-analysis of randomized controlled trials.

**Data sources:** Medline, Scopus, and CINAHL databases were searched since inception to 7<sup>th</sup> August 2016.

**Eligibility criteria:** Randomized controlled trials comparing the efficacy of home-based non-pharmacological interventions with usual care of depressed patients were included in the review.

**Main outcomes:** Depression symptom scores and disease remission rates at the end of treatment.

**Results:** Seventeen studies were included in the review. Home-based non-pharmacological interventions were categorized as 1) home-based psychological intervention, 2) home-based exercise intervention, 3) combined home-based psychological intervention with exercise intervention, and 4) complimentary or alternative medicine. Complementary and alternative medicine approaches were excluded from the meta-analysis due to heterogeneity. The standardized mean differences of post-treatment depression symptom scores between usual care groups and home-based psychological intervention, home-based exercise intervention, and combined home-based psychological intervention with exercise intervention were -0.57 (95%CI:-0.84, -0.31), -1.03 (95%CI:-2.89, 0.82), and -0.78 (95% CI:-1.09,-0.47), respectively. These results suggest that only home-based psychological intervention and combined home-based psychological intervention with exercise intervention could significantly decrease depression scores. Compared with usual care groups, the disease remission rate was also significantly higher for home-based psychological intervention (pooled risk ratio = 1.53; 95% CI: 1.19, 1.98) and combined home-based psychological intervention with exercise intervention (pooled risk ratio = 3.47; 95% CI: 2.11, 5.70). Of all the studied interventions, combined home-based psychological intervention with exercise intervention had the highest probability of resulting in disease remission.

**Conclusion:** Our study confirms the efficacy of home-based psychological intervention and combined home-based psychological intervention with exercise intervention in the treatment of depression.

1  
2  
3 Combined home-based psychological intervention and exercise intervention was the best treatment  
4 and should be considered for inclusion in clinical guidelines for managing depression.  
5  
6

### 7 **Strengths and limitations of this study**

- 9 • Our analysis provides the first comprehensive review of the efficacy of home-based non-  
10 pharmacological interventions in treating depression.  
11
- 12 • A comprehensive search was undertaken to identify as many relevant studies as possible.  
13
- 14 • We performed a network meta-analysis to compare the efficacy of home-based interventions  
15 in order to identify the best treatment regimen.  
16
- 17 • The quality of included studies in the area of allocation concealment was not optimal.  
18
- 19 • Participants in our included studies were aware of their own interventions and the outcomes  
20 were subjective.  
21  
22  
23  
24  
25  
26  
27  
28  
29  
30  
31  
32  
33  
34  
35  
36  
37  
38  
39  
40  
41  
42  
43  
44  
45  
46  
47  
48  
49  
50  
51  
52  
53  
54  
55  
56  
57  
58  
59  
60

## INTRODUCTION

Recent studies have highlighted the international recognition of depression as one of the leading global burdens of disease (GBD)<sup>1</sup>. Depression is associated not only with greater morbidity and mortality but also with increasing health service use and costs<sup>2</sup>. In addition, untreated depression has been recognized as a strong predictor of poor health outcomes in elderly<sup>3-5</sup> and adult patients with chronic disease<sup>6-8</sup>.

Both pharmacological and non-pharmacological interventions, such as psychotherapy or supervised exercise intervention, have been accepted as standard treatments of depression. However, concerns about drug side effects and dependency appear to make patients prefer psychological interventions. One study showed that around 70% of depressed patients were non-compliant with antidepressants because of concerns about their side effects<sup>9</sup>. Even though non-pharmacological interventions were preferred over antidepressants<sup>10 11</sup>, only a very small percentage of patients referred for psychotherapy were able to enter and complete this treatment<sup>12</sup>. This inconsistency between patient preference and low rates of initiation and adherence to treatment could be a consequence of barriers to obtaining treatment. Non-pharmacological interventions are usually clinic or hospital-based and require visits on a weekly or monthly basis. In one study, 70% of patients reported structural barriers preventing them from attending psychotherapy sessions regularly and cited time constraints, transportation problems and cost as being significant obstacles<sup>13</sup>.

Among older patients, whose prevalent rate of depression is very high, these problems were aggravated by concurrent medical illness, social isolation, functional impairment or being home-bound<sup>14-20</sup>. Overcoming these barriers by providing interventions in patients' own homes may achieve better treatment adherence and thereby greater treatment success than clinic or hospital-based interventions.

Home-based non-pharmacological interventions, such as problem solving therapy<sup>21-25</sup> and home-based exercise intervention<sup>26 27</sup>, have developed over several years. Although some studies have suggested that these approaches can improve depressive symptoms and rates of remission when compared with standard usual care<sup>26 28 29</sup>, other studies have reported conflicting results<sup>27 30 31</sup>. In recent years new home-based interventions have been introduced to treat depression, such as spirituality teaching programme<sup>32</sup> and combined home-based psychotherapy with exercise intervention but their efficacy is still controversial. Therefore, our systematic review and network meta-

1  
2  
3 analysis was undertaken with the aim of reviewing all available home-based non-pharmacological  
4 interventions, pooling the effect sizes of each intervention on symptom improvement and indirectly  
5 comparing treatment efficacy between the different interventions. The results of this review should be  
6 useful for identifying the most beneficial home-based non-pharmacological interventions and for  
7 informing clinical guidelines for treating depression.  
8  
9  
10  
11

## 12 **METHODS**

### 13 **Search strategy**

14  
15  
16  
17 Relevant studies were identified using Medline, Scopus, and CINAHL databases searched  
18 from inception to 7<sup>th</sup> August 2016. Reference lists of included studies were also explored. Search  
19 terms and search strategies for each database are presented in a Supplementary Appendix.  
20  
21  
22

### 23 **Selection of studies**

24  
25  
26 Initially studies were selected from titles and abstracts by two independent reviewers (K.S.  
27 and T.A.). Full articles were retrieved to aid decision making if decision could not be made based on  
28 titles and abstracts. Disagreement between the two reviewers was resolved by discussion.  
29 Percentage agreement between the two reviewers was estimated using kappa statistics.  
30  
31  
32  
33

### 34 **Inclusion criteria**

35  
36 Randomized-controlled trials published in English were eligible for the review if they met all of  
37 the following criteria:  
38  
39

- 40 1. Study participants were adults aged more than 18 years with a diagnosis of any degree of  
41 depressive disorder using the criteria of the Diagnostic and Statistical Manual of Mental  
42 Disorders 4th Edition (DSM-IV) or any diagnostic tool used for diagnosis or screening for  
43 depression. Participants who were children, adolescents or postpartum women were  
44 excluded.  
45  
46  
47  
48  
49
- 50 2. Interventions of interest were non-pharmacological and provided in the patient's home, such  
51 as cognitive behavioral therapy, problem solving therapy, family therapy, or home-based  
52 exercise intervention.  
53  
54
- 55 3. Treatment comparison was the standard care of depression in outpatient clinics or hospital  
56 settings.  
57  
58  
59  
60

4. Outcomes were measured by the level or severity of depressive symptoms or the incidence of disease remission at the end of the intervention.
5. Studies provided sufficient data for analysis, such as number of participants (n), mean depression score, standard deviation (SD) for each intervention group, and the number of patients per intervention group with or without disease remission.

### Data extraction

Two reviewers (KS and TA) independently used a standardized data record form to extract baseline characteristics of included studies and outcomes of interest. Disagreement between the two reviewers was resolved by discussion and corresponding authors of studies were contacted if information was incomplete.

### Interventions of interest

Home-based non-pharmacological intervention was defined as any care or management of depression provided by health care professionals at a patient's place of residence. Home-based interventions had to have a clear and definite objective. Home visits that provided only health-education, social or emotional support were, therefore, excluded from this study.

### Outcomes of interest

The outcomes of interest were depressive symptom scores and disease remission rates at the end of treatment. Disease remission was defined according to the criteria of the original article. Included studies used several tools for measuring the severity of depressive symptoms, namely the Hamilton Depression Rating Scale (HAM-D)<sup>21 22 30 33 34</sup>, Patient Health Questionnaire-9 (PHQ-9)<sup>24 35</sup>, Geriatric Depression Scale (GDS)<sup>23 26 28</sup>, Hopkins Symptom Checklist-20 (HSCL-20)<sup>36 37</sup>, Montgomery Asberg Depression Rating Scale (MADRS)<sup>18 25 27</sup>, Beck Depression Inventory-Fast Screen (BDI-FS)<sup>38</sup> and Center of Epidemiologic Studies Depression Scale (CES-D)<sup>39</sup>. These tools have different score ranges (HAM-D = 0-53, PHQ-9 = 0-27, GDS = 0-15, HSCL-20 = 0-4, MADRS = 0-60, BDI-FS = 0-21, and CES-D = 0-60) with higher scores in all tools representing increasing severity of depressive symptoms.

### Risk of bias assessment

1  
2  
3 To assess the quality of included studies, a risk of bias assessment tool<sup>40</sup> was applied by two  
4 independent reviewers (K.S., T.A.). Seven domains were evaluated as follows: 1) random sequence  
5 generation 2) allocation concealment 3) blinding of participants and personnel 4) blinding of outcome  
6 assessors 5) incomplete outcome data 6) selective outcome reporting 7) other sources of bias. The  
7 quality of the studies was classified as being at high, unclear, or low risk of bias. We added the  
8 domain of power to determine the likelihood of any studies making a true difference to outcome,  
9 classifying any study as being at high risk of bias if it reported a power less than 80%. Disagreement  
10 between the two reviewers was settled by discussion.  
11  
12  
13  
14  
15  
16  
17

### 18 **Statistical analysis**

19  
20 Because depression scores were measured differently among the studies, for direct  
21 comparison the standardized mean differences (SMD) of depressive scores between intervention and  
22 control groups were estimated for individual studies and then were pooled across studies.  
23 Heterogeneity between studies was estimated by Q test and  $I^2$  statistic. Heterogeneity between  
24 studies was considered if the P-value from Q test was less than 0.10 or if  $I^2$  was equal to or greater  
25 than 25%<sup>41</sup>. If heterogeneity was presented, the SMD was estimated by applying the random effect  
26 model. Otherwise the fixed effect model was applied.  
27  
28  
29  
30  
31  
32  
33

34 For dichotomous outcomes, relative risks (RR) of disease remission were calculated for each  
35 study. The random effect model was used for pooling RR if there was evidence of heterogeneity  
36 between studies. Otherwise the inverse variance method was used. Sources of heterogeneity were  
37 explored by considering possible factors one by one in a meta-regression model (e.g. mean age,  
38 severity of depression at baseline and types of intervention delivery).  
39  
40  
41  
42  
43

44 A network meta-analysis was applied to indirectly assess intervention effects for all home-  
45 based interventions, i.e., home-based psychological intervention, home-based exercise intervention,  
46 combined home-based psychological intervention and exercise intervention, and usual care. This  
47 method allows us to perform indirect comparison using common comparator. For instance, some  
48 studies compared home-based psychological intervention with usual care, some others compared  
49 home-based exercise intervention with usual care, non or few studies compared home-based  
50 psychological intervention with home-based exercise intervention. Using common comparator as  
51 usual care would allow to indirectly compare home-based psychological intervention with home-based  
52  
53  
54  
55  
56  
57  
58  
59  
60



1  
2  
3 exercise intervention<sup>42</sup>. Treatment effects for each study were estimated using a two-stage network  
4 meta-analysis. Firstly, summary data was expanded into individual patient data using the 'expand'  
5 command in STATA program. Binary regression was applied to estimate log (RR) and variance-  
6 covariance of each treatment using 'mvmeta' make command. A multivariate random effect meta-  
7 analysis was used to calculate the pooled RRs and their 95% confidence intervals (CI). Riley's  
8 method was used for considering subject-study correlation. Treatment ranking was made according to  
9 the linear predictor of each study. In addition, a consistency assumption (i.e., discrepancy of  
10 intervention effects between direct and indirect meta-analyses) was assessed using the standardized  
11 normal test (Z).  
12  
13  
14  
15  
16  
17  
18  
19

20 Publication bias was assessed using Egger test and funnel plot. If the funnel plot showed  
21 asymmetry, a contour enhanced funnel plot was performed to explore whether asymmetry was the  
22 result of heterogeneity between studies or arisen from publication bias. All analyses were performed  
23 using STATA version 14. A two-sided test with P-value less than 0.05 was considered statistically  
24 significant, except for the Q test, in which a P-value less than 0.10 was applied.  
25  
26  
27  
28  
29

### 30 Patient involvement

31  
32 Patients were not involved in the design of the study, development of outcome measures, or  
33 conduct of the study. We did not ask patients for advice on interpreting or writing up results. There are  
34 no plans to disseminate the results of the research to study participants.  
35  
36  
37  
38

## 39 RESULTS

40  
41 We identified 385, 534, 255, and 2 articles from Medline, Scopus, CINAHL databases and  
42 reference lists respectively. After deleting duplications, the titles and abstracts of 768 studies were  
43 reviewed. Finally, 17 studies met our inclusion criteria and were eligible in the review (Figure 1).  
44 Agreement of study selection between the two reviewers was high at 86.7% (Kappa = 0.50). All but  
45 one<sup>18</sup> of the included studies reported protocol approval by an ethics committee.  
46  
47  
48  
49  
50

### 51 Study participants

52  
53 The baseline characteristics of included studies are presented in Table 1. The type and  
54 severity of depression of participants differed between studies. Four studies<sup>25 28 33 34</sup> included patients  
55 with major depressive disorder, four<sup>22 23 37 39</sup> included patients with minor depression and nine<sup>18 21 24 26</sup>  
56  
57  
58  
59  
60

1  
2  
3 27 30 35 36 38 included patients with mixed severities of depression. Ten studies included elderly  
4 patients<sup>18 21-26 28 37 39</sup> while seven studies included adults with ages greater than 18 years<sup>27 30 33-36 38</sup>.  
5  
6 Ten studies included depressed patients with other co-morbidities (i.e. epilepsy<sup>36</sup>, heart diseases<sup>22 30</sup>  
7  
8 <sup>35</sup>, disability<sup>18</sup>, and mild to moderate cognitive impairment<sup>25</sup>). Twelve studies<sup>21 23 24 26-28 33 34 37-39</sup>  
9  
10 included patients without co-morbidity. Use of anti-depressants at baseline varied widely between  
11  
12 studies, ranging from 0% to 95%.

### 14 **Home-based interventions**

15  
16  
17 The composition of home-based non-pharmacological interventions differed among the  
18 included studies but could be categorized into 4 groups: 1) home-based psychological intervention 2)  
19 home-based exercise intervention 3) combined home-based psychological intervention with home-  
20 based exercise intervention 4) complementary or alternative medicine. Eight, 3 and 3 studies  
21 compared home-based psychological intervention with usual care, home-based exercise intervention  
22 with usual care, and combined home-based psychological intervention with home-based exercise  
23 intervention with usual care, respectively. One study compared the efficacy between home-based  
24 psychological intervention, home-based exercise intervention, combined home-based psychological  
25 intervention with home-based exercise intervention, and usual care. Since interventions in the  
26 category of complementary or alternative medicine were heterogeneous, they were not included in the  
27 meta-analysis but were subjected to qualitative analysis. Details of each home-based intervention are  
28 summarised below:  
29  
30  
31  
32  
33  
34  
35  
36  
37  
38  
39

#### 40 ***Home-based psychological intervention***

41  
42 Home-based psychological intervention was classified as home-based problem-solving  
43 treatment or home-based cognitive behavioral therapy.  
44  
45

##### 46 1. ***Home-based problem-solving treatment*** (6 studies<sup>21 22 24 25 28 29</sup>)

47  
48  
49 Home-based problem-solving treatment (PST) is a skill-enhancing behavioral treatment of  
50 depression usually delivered by social workers and psychologists. This approach assumes that  
51 depressive symptoms are caused and maintained by problems of daily life and that these can be  
52 reduced by identifying and addressing them systematically. Each PST session comprises 1) defining  
53 and formulating the nature of the depressive problem 2) generating a range of alternative solutions to  
54  
55  
56  
57  
58  
59  
60

1  
2  
3 the problem 3) systematically evaluating the possible consequences of each solution then selecting  
4 the most appropriate one 4) monitoring and evaluating the actual outcome. In addition, PST identifies  
5 patients' pleasurable activities and encourages them to participate in these activities.  
6  
7

8  
9 2. *Home-based cognitive behavioral therapy (CBT)* (3 studies<sup>30 38 39</sup>)  
10

11 The aim of CBT is to modify the dysfunctional emotions, behaviours, and thoughts of  
12 depressed patients. This type of intervention was identified in 3 studies, of which 2 studies were CBT-  
13 based bibliotherapy. In this approach, participants received self-help books or leaflets that included  
14 instruction on cognitive behavioral self-help, mood management skills, and tasks to practice. During  
15 the intervention period, participants were visited by home care nurses or contacted by telephone by  
16 study investigators to assess their symptoms and encourage them to follow the course at their own  
17 pace.  
18  
19  
20  
21  
22  
23

24  
25 ***Home-based exercise intervention***  
26

27 Home-based exercise intervention was employed in 4 studies. Exercise included both  
28 progressive resistance training, aerobic exercise<sup>26 27</sup> and aerobic exercise only<sup>30 34</sup>. Participants were  
29 required to perform the exercises for at least 30 minutes three times a week.  
30  
31  
32

33  
34 ***Combined home-based psychological intervention with exercise intervention***  
35

36 Home-based psychological intervention combined with exercise intervention was the  
37 interested intervention in 4 studies. Each of these applied aerobic exercise as a home-based exercise  
38 intervention but psychological therapies differed among them (PST in two studies<sup>36 37</sup>, cognitive  
39 behavioral therapy in one study<sup>30</sup> and family therapy with bereavement counselling and social  
40 interventions in one study<sup>18</sup>).  
41  
42  
43  
44

45  
46 ***Complementary or alternative medicine***  
47

48 This intervention refers to a broad set of health care practices or activities that are not  
49 integrated into the dominant health care system. This type of intervention was used in 2 studies. One  
50 involved home-based deep-breathing exercise<sup>35</sup> aimed at stimulating a relaxation response, (i.e. to  
51 decrease arousal, heart rate and blood pressure, and to reduce responsiveness of the sympathetic  
52 nervous system). Deep-breathing exercises can also help patients to disregard negative and  
53  
54  
55  
56  
57  
58  
59  
60

1  
2  
3 distracting thoughts. Patients were trained by experienced nurses to breathe at a rate of six breaths  
4 per minute. During the treatment period, this was undertaken in a quiet environment for a period of  
5 ten minutes, three times each day.  
6  
7

8  
9 The other intervention employed a spirituality teaching programme<sup>32</sup> aiming to promote  
10 contemplation of the inter-relation between meaning and purpose, connectedness with others, nature  
11 or the divine, and values such as compassion, love, justice, and forgiveness. The programme  
12 comprised eight sessions involving explanation of the divine aspect of the self, teaching breathing and  
13 visualization practice, helping patients to connect with the divine through prayer or meditation, letting  
14 go of regret and fostering gratitude, practicing self-awareness relating to the five senses, and building  
15 upon connectedness with others. Participants were also advised to avoid forming expectations and to  
16 refrain from judging outcomes. Initially patients participated in a workshop run by psychiatrists and  
17 were then required to practice by themselves with the help of audio CDs.  
18  
19  
20  
21  
22  
23  
24

### 25 26 **Treatment comparison** 27

28  
29 Usual care, defined as the standard care of depression managed in a clinic or hospital setting,  
30 was applied as a treatment comparator for all studies. In addition to usual care, three studies<sup>25 26 29</sup>  
31 included home visits and two<sup>21 35</sup> included telephone support. However, these interventions provided  
32 education about depression together with general social or emotional support but did not offer specific  
33 psychological help or exercise intervention. With the exception of one study<sup>32</sup>, almost all used anti-  
34 depressant medication as a co-intervention but the decision to initiate or maintain this was dependent  
35 on the judgement of patients and their physicians.  
36  
37  
38  
39  
40  
41

### 42 **Risk of bias assessment** 43

44  
45 Results of risk of bias assessment are presented in Supplementary Table 1. Most of the  
46 studies (14 studies) reported low risk of bias in the domain of random sequence generation, while 3  
47 studies<sup>21 22 30</sup> reported unclear risk. For allocation concealment, 11 studies<sup>18 21 22 25-30 38 39</sup> had unclear  
48 risk of bias, while 6 studies<sup>24 32 34-37</sup> had low risk of bias. All studies reported high risk of bias in the  
49 domain of blinding of participants and personnel and low risk of bias in other domains. Ten studies<sup>18 22</sup>  
50  
51  
52  
53  
54  
55  
56  
57  
58  
59  
60  
25-27 29 30 32 34 36 had low risk of bias for blinding of outcome assessors, whereas 7 studies<sup>21 24 28 35 37-39</sup>  
had unclear risk. For the domain of incomplete outcome data, 13 studies<sup>18 22 24-27 29 30 32 34 36 37 39</sup>

1  
2  
3 reported low risk of bias and 4 studies<sup>21 28 35 38</sup> reported high risk. Almost all studies (16 studies) had  
4 low risk of bias for selective outcome reporting, while only one study<sup>36</sup> had high risk of bias. In the  
5 domain of power, 10 studies had unclear risk of bias, 6 reported low risk and 1 had high risk of bias.  
6  
7

### 8 9 **Pooled mean difference of depression score**

#### 10 11 *Home-based psychological intervention vs usual care*

12  
13  
14 Nine studies were analyzed<sup>21 22 24 25 28-30 38 39</sup> comparing home-based psychological  
15 intervention with usual care (N = 739). Depression scores were assessed at the end of treatment,  
16 which ranged from 6 to 48 weeks. The mean differences and 95% CIs of depression scores for each  
17 study are presented in Table 2. SMD of home-based psychological intervention versus usual care  
18 was -0.57 (95% CI: -0.84, -0.31), suggesting that home-based psychological intervention can  
19 significantly decrease depression scores when compared with usual care.  
20  
21

22  
23  
24  
25  
26 Moderate heterogeneity was found between studies, with  $I^2$  of 63.5%. Sources of  
27 heterogeneity were explored but none of the factors decreased  $I^2$ . Subgroup analyses were performed  
28 according to the severity of depression (i.e. major depressive disorder (MDD), minor depression and  
29 mixed severity of depression). These showed that SMDs in patients with MDD, minor depression, and  
30 mixed severity of depression were -0.95 (95% CI: -1.35, -0.55;  $I^2 = 16.5\%$ ), -0.61 (95% CI: -1.28, 0.06;  
31  $I^2 = 82.1\%$ ), and -0.41, (95% CI: -0.62, -0.19;  $I^2 = 0\%$ ) respectively (see Supplementary Figure 1).  
32  
33 These suggest that home-based psychological intervention reduces depression scores significantly in  
34 the groups of MDD and mixed severity of depression. In addition, the efficacy of this intervention in  
35 patients with MDD was better than the efficacy in patients with minor depression.  
36  
37  
38  
39  
40  
41  
42

#### 43 44 *Home-based exercise intervention vs usual care*

45  
46 Three studies<sup>26 30 34</sup> (N = 321) were pooled to compare the effect of home-based exercise  
47 intervention with usual care. The SMD was -1.03 (95% CI: -2.89, 0.82;  $I^2 = 97.9\%$ ) (Table 2 and  
48 Supplementary Figure 2A). The mean depression score in the home-based exercise intervention  
49 group was therefore 1.03 units lower than the mean depression score in the usual care group.  
50  
51  
52  
53 However, this effect did not reach statistical significance.  
54  
55  
56  
57  
58  
59  
60

### *Combined home-based psychological intervention with exercise intervention vs usual care*

Only two studies<sup>30 37</sup> (N = 169) had sufficient data for pooling the effect on the depression score of combined home-based psychological intervention with exercise intervention. Mean depression scores were measured at the ends of the treatments, namely at 12 weeks<sup>30</sup> and 24 weeks<sup>37</sup>. Table 2 shows the mean depression scores and 95% CIs for each study. SMD was -0.78 (95% CI: -1.09, -0.47;  $I^2 = 0.0\%$ ) (Supplementary Figure 2B). This indicates that patients receiving combined home-based psychological intervention and exercise intervention had significantly lower mean depression scores (by 0.78 units) than patients receiving usual care.

### **Pooled risk ratio of disease remission**

#### *Home-based psychological intervention vs usual care*

Four studies (N = 459) comparing the effectiveness of home-based psychological intervention with usual care had remission rates as their outcome of interest. Remission from depression was defined as HAMD score  $\leq 7$  in one studies<sup>25</sup>, PHQ-9  $\leq 4$  in one study<sup>24</sup>, BDI  $< 4$  in one study<sup>38</sup> and CES-D  $< 16$  in one study<sup>39</sup> (Table 3). The pooled RR was 1.53 (95% CI: 1.19, 1.98) (Supplementary Figure 3), suggesting that patients receiving home-based psychological intervention were approximately 1.7 times more likely to have remission from depression than patients receiving usual care. The results among studies were homogeneous with  $I^2$  of 0%.

#### *Home-based exercise intervention vs usual care*

Two studies (N = 248) reported their outcome as disease remission and had sufficient data for pooling. Disease remission was defined as HAMD score  $\leq 7$ <sup>34</sup> or symptoms no longer meeting the criteria for major and minor depression according to DSM-IV criteria<sup>27</sup> (Table 3). The pooled RR was 0.99 (95% CI: 0.79, 1.24;  $I^2 = 0.0\%$ ) (Supplementary Figure 4A), indicating that there was no significant difference between home-based exercise intervention and usual care in the likelihood of having remission from depression.

#### *Combined home-based psychological intervention and exercise intervention vs usual care*

Three studies (N = 279) were pooled to compare remission rates between combined psychological intervention and usual care. Disease remission was defined as HSCL-20 score  $< 0.5$  for

1  
2  
3 two studies<sup>36 37</sup> but in Banerjee's study<sup>18</sup> the outcome was not clearly defined (Table 3). Pooled RR  
4 was 3.47 (95% CI: 2.11, 5.70;  $I^2 = 19.7\%$ ) suggesting that the combination of home-based  
5 psychological intervention and exercise intervention significantly increased the likelihood of remission  
6 from depression when compared with usual care (Supplementary Figure 4B).  
7  
8  
9

## 10 **Network meta-analysis**

### 11 *Disease remission rate*

12  
13  
14  
15  
16 Nine studies (N = 987) were included in the network meta-analysis. Supplementary Figure 5  
17 shows the network plot of home-based psychological intervention, home-based exercise intervention,  
18 combined home-based psychological intervention with exercise intervention, and usual care. Size of  
19 node and edge reflect the number of studies and patients respectively. From the plot, usual care was  
20 the common comparator and had the largest sample size of the four treatment regimes. Home-based  
21 psychological intervention versus usual care had the largest number of studies.  
22  
23  
24  
25  
26

27  
28 Pooled RRs for each treatment comparison are presented in Figure 2. Compared with usual  
29 care, only combined home-based psychological intervention with exercise intervention and home-  
30 based psychological intervention alone significantly increased the likelihood of disease remission, with  
31 pooled RRs of 3.12 (95% CI: 1.71, 5.70) and 1.50 (95% CI: 1.17, 1.93) respectively. In addition, the  
32 incidence of disease remission in home-based psychological intervention and combined home-based  
33 psychological intervention with exercise intervention groups was significantly higher than in the home-  
34 based exercise intervention group, having pooled RRs of 1.49 (95% CI: 1.07, 2.10) and 3.10 (95% CI:  
35 1.63, 5.90), respectively. When compared with home-based psychological intervention alone,  
36 combined home-based psychological intervention with exercise intervention also significantly  
37 improved the rate of disease remission (pooled RR = 2.08; 95% CI: 1.08, 3.99).  
38  
39  
40  
41  
42  
43  
44  
45  
46

47 Treatment ranking was assessed by estimating the probability of each treatment being the  
48 best. This yielded probabilities of 99.5%, 0.5%, and 0% for combined home-based psychological  
49 intervention with exercise intervention, home-based psychological intervention alone, and home-  
50 based exercise intervention respectively. Combined home-based psychological intervention with  
51 exercise intervention therefore emerged as the best intervention for achieving remission from  
52 depression.  
53  
54  
55  
56  
57  
58  
59  
60

1  
2  
3 Applying inconsistency assumptions to the treatments, inconsistency factors were calculated  
4 as 0.020 (Z=0.183, P-value=0.912) for home-based psychological intervention vs usual care, -0.018  
5 (Z=0.110, P-value=0.913) for home-based exercise intervention vs usual care, and 0.106 (Z=0.107,  
6 P-value=0.915) for combined home-based psychological intervention with exercise intervention  
7 versus usual care. These figures find no significant difference between the direct and indirect  
8 comparison of estimated treatment effects.  
9

### 14 **Efficacy of complementary or alternative medicine**

17 Results from a study comparing the efficacy of home-based deep-breathing exercises with  
18 usual care showed that patients receiving this intervention had significantly lower depression scores  
19 than patients receiving usual care, with a mean difference of -1.34 (95% CI: -1.17, -0.17). Another  
20 study compared the efficacy of home-based spiritual therapy with usual care. Findings from this study  
21 suggested that home-based spiritual therapy could significantly decrease depression scores when  
22 compared with usual care, with a mean difference of -1.11 (95% CI: -1.57, -0.65). In addition, this  
23 study found that patients receiving home-based spiritual therapy were more likely to have disease  
24 remission than patients receiving usual care. The risk ratio of disease remission (defined as HAMD  
25 score  $\leq 7$ ) from this study was 13.85 (95% CI: 1.88, 101.74)  
26  
27  
28  
29  
30  
31  
32  
33

### 34 **Publication bias**

37 Egger tests and Funnel plots did not suggest any publication bias for pooling the effect of  
38 home-based psychological intervention (coefficient = -0.05, P-value = 0.882) and home-based  
39 exercise intervention (coefficient = 6.94, P-value = 0.818) (see Supplementary Figure 6A and 6B). For  
40 combined home-based psychological intervention and exercise intervention, the Egger test did not  
41 suggest publication bias but a funnel plot showed asymmetry (Supplementary Figure 7A). This  
42 inconsistency might be due to Egger's test having insufficient power to detect a difference when only  
43 3 studies were considered in the analysis.  
44  
45  
46  
47  
48

50 The cause of this asymmetry was further explored by performing a contour enhanced funnel  
51 plot which showed that most of the studies fell inside the significant area. The asymmetrical plot may,  
52 therefore, result from a small study effect rather than heterogeneity between studies (see  
53 Supplementary Figure 7B).  
54  
55  
56  
57  
58  
59  
60



## DISCUSSION

Our study found that a combination of home-based psychological intervention with exercise intervention and home-based psychological intervention alone both significantly decreased depressive symptoms and increased the likelihood of disease remission when compared with usual care. The SMD of home-based psychological intervention vs usual care was -0.57, which reflects the moderate magnitude of treatment effect, while SMD of combined home-based psychological intervention with exercise intervention vs usual care was -0.78 revealing the high magnitude<sup>43</sup>. Treatment effect of these two interventions were comparable with selective serotonin reuptake inhibitor, which had SMD of 0.05, for treatment of depression<sup>44</sup>. However, we could not demonstrate any benefit of home-based exercise intervention alone when compared with usual care. In addition, combined home-based psychological intervention with exercise intervention had the highest probability of remission from depression compared both with home-based psychological intervention and home-based exercise intervention.

The effectiveness of clinic-based psychological intervention for treating depression has been confirmed by previous studies<sup>39 45 46</sup>. The results of our study also support the efficacy of this intervention when performed in the patient's home. In our review, the majority of participants in the included studies were depressed patients with comorbidities such as epilepsy<sup>36</sup> or heart disease<sup>22 30 35</sup>, or were elderly patients with disabilities<sup>18</sup> or cognitive impairment<sup>25</sup>. These groups have a high prevalence of depression and should therefore be expected to receive a significant share of mental health provision. However, their ability to access conventional clinic-based mental health services is restricted by mobility problems and low motivation to seek help. With its ability to overcome these barriers, home-based psychological intervention is particularly appropriate in these situations.

In addition to demonstrating the efficacy of home-based psychological intervention overall, subgroup analysis within our study raises an interesting point. Home-based psychological intervention decreased symptoms of depression for all types of depression but the effect was statistically significant only in patients with MDD and mixed severity depression, not for those with minor depression. This inconsistent finding may result from the so called "ceiling" effect. The level of depressive symptoms in minor depression is relatively low at baseline when compared with major

1  
2  
3 depression, which could limit the potential for symptom improvement<sup>47</sup>. This ceiling effect was also  
4 found in the studies reviewing the use of antidepressant medication for minor depressive symptoms.  
5  
6

7 The rationale for home-based exercise intervention rests on the theory that increasing  
8 physical activity can improve depressive symptoms through psychological and physiological routes.  
9 Exercise serves as a distraction from worries and depressive thoughts, increases self-efficacy, and  
10 gives a sense of mastery. Possible physiological mechanisms include an increase in body  
11 temperature, leading to a feeling of relaxation and reduced muscle tension, an increase in levels of  
12 endorphins related to positive mood and a sense of well-being, and increases in the availability of the  
13 central neurotransmitters dopamine, norepinephrine and serotonin<sup>43,39 48</sup>. Although the advantages of  
14 clinic-based or supervised exercise to treat depression have been confirmed by previous literature<sup>1</sup>,  
15 our study found no benefit from home-based exercise intervention in ameliorating depressive  
16 symptoms. The differences in these findings may be explained by poorer treatment compliance in the  
17 home-based exercise intervention group, as to achieve significant benefit patients have to practice the  
18 exercise programme at a prescribed intensity and frequency. Lack of motivation and inattention are  
19 common symptoms in depression and may account for unsupervised patients failing to achieve the  
20 prescribed levels of activity when compared with those given encouragement through supervision.  
21 This assumption corresponds with findings from the home-based exercise studies<sup>26 27</sup> that the  
22 physical health of patients in this group (i.e. cardio-respiratory capacity, BMI, and lower limb strength),  
23 the surrogate endpoints of exercise intervention, did not change significantly from baseline.  
24  
25  
26  
27  
28  
29  
30  
31  
32  
33  
34  
35  
36  
37  
38

39 Although our study did not find any advantages of home-based exercise intervention over  
40 usual care, when combined with psychological intervention the combined approach had a significantly  
41 greater benefit than either of these interventions alone. The combination may have a synergistic  
42 effect, with psychological intervention improving motivation to initiate and maintain an exercise  
43 programme while the latter in turn enhances the benefits of psychological intervention.  
44  
45  
46  
47  
48

49 Reviewing complimentary or alternative medicine approaches, results from Chung et al<sup>35</sup> and  
50 Rickhi et al<sup>32</sup> showed that home-based deep-breathing training and spiritual teaching programmes  
51 could significantly reduce depressive symptoms when compared with usual care. However, these two  
52 studies had small sample sizes and included specific populations, namely coronary heart disease  
53  
54  
55  
56  
57  
58  
59  
60

1  
2  
3 patients for Chung's study and middle-aged females for Rickhi's study. Their findings may not,  
4  
5 therefore, be generalizable to other populations.  
6

### 7 **Strengths and limitations**

8  
9  
10 Our study has several strengths. Given the potential of home-based interventions to treat  
11  
12 depression and the increasing use of these interventions, our analysis provides the first  
13  
14 comprehensive review of the efficacy of home-based interventions in treating depression. A  
15  
16 comprehensive search was undertaken to identify as many relevant studies as possible and two  
17  
18 reviewers selected the studies independently with a high level of agreement. Selection bias was,  
19  
20 therefore less likely. In addition, we performed a network meta-analysis to compare the efficacy of all  
21  
22 available home-based interventions in order to identify the best treatment regime.  
23

24  
25 We are aware that our study may have some limitations. Firstly, the quality of included studies  
26  
27 in the area of allocation concealment was not optimal. The results from our study might, therefore, be  
28  
29 affected by selection bias and should be interpreted with caution. Secondly, participants in our  
30  
31 included studies were aware both of their own interventions and their subjective outcomes, including  
32  
33 the self-reported depression scores. However, in most of the included studies this bias from non-  
34  
35 blinded intervention was minimized by blinding the outcome assessors. Thirdly, some of the included  
36  
37 studies considered home visits as a treatment comparator. This may have resulted in an  
38  
39 underestimated treatment effect for the home-based interventions.  
40

41  
42 A network meta-analysis is a useful technique and has been increasingly applied because it  
43  
44 allows indirectly compare efficacy of all possible interventions given that there are some common  
45  
46 comparators. However, this technique is required two important assumptions, i.e., transitivity and  
47  
48 consistency<sup>49</sup>. The transitivity requires that characteristics of patients and studies of those direct  
49  
50 comparisons that performed indirect comparisons should be similar. For instance, characteristics of  
51  
52 patients of home-based psychological intervention versus usual care and home-based exercise  
53  
54 intervention versus usual care should be similar to perform indirect comparison of home-based  
55  
56 psychological intervention versus home-based exercise intervention. This assumption cannot be  
57  
58 directly assessed and tested but consistency testing is a manifestation of transitivity. Therefore, we  
59  
60 assessed consistency assumption by comparing intervention effects between direct and indirect  
61  
62 estimates. However, numbers of included studies might play a role in this assessment, i.e., false

1  
2  
3 negative result might be present when direct and indirect estimates were not statistically different. For  
4 our study, the inconsistency factors ranged from -0.018 to 0.106, which should be less likely to face  
5 with false negative result.  
6  
7

8  
9 We could not check consistency assumption in 3 indirect comparisons because of lack of  
10 direct comparisons. We therefore explored characteristics of patients (i.e. mean age, types of  
11 depression, percentage of anti-depressants use) and duration of intervention and found that they  
12 mostly varied between studies and comparisons (see Supplementary Table 2). This heterogeneity  
13 within and between interventions across included studies may affect the transitivity and consistency  
14 assumptions of our network met-analysis. Therefore, the results from indirect comparison, e.g. the  
15 efficacy of home-based psychological intervention and combined home-based psychological  
16 intervention with exercise intervention over home-based exercise alone, should therefore be  
17 interpreted with caution and be confirmed by undertaking further randomized-controlled trials directly  
18 comparing these two interventions with home-based exercise intervention.  
19  
20  
21  
22  
23  
24  
25  
26

### 27 28 **Clinical implication and further study** 29

30  
31 Depression is a common disorder, particularly among the elderly and in those with a chronic  
32 disease. Many of these patients have difficulty accessing mental health services due to physical  
33 disabilities and transportation problems. Home-based interventions to treat depression have the  
34 potential to overcome these barriers and have been shown by our study to be effective. This  
35 information should prove helpful when designing clinical guidelines. However, there are obvious  
36 logistical differences between home-based treatments for depression and conventional clinic-based  
37 care. Our study has not investigated these aspects of treatment design and, in particular, has not  
38 considered manpower implications or transport costs. An economic evaluation study is needed before  
39 general implementation of a home-based care model can be recommended unequivocally.  
40  
41  
42  
43  
44  
45  
46  
47

48  
49 Although a randomized-controlled trial is considered to be the gold standard for therapeutic  
50 research, in a real world setting this design may not be ideal for examining patient preferences and  
51 adherence to treatment. In this review, most of the studies (n=10) did not report the degree of  
52 adherence with the prescribed intervention. Seven studies demonstrated the effect of adherence on  
53 outcomes but used different definitions to assess adherence. To maximize treatment efficacy, further  
54 studies should determine the effects of patient preferences and adherence to treatment for different  
55  
56  
57  
58  
59  
60

1  
2  
3 approaches and modes of delivery as well as examine the factors that influence preferences and  
4 adherence.  
5  
6

## 7 **CONCLUSION**

8  
9  
10 Our study has confirmed the efficacy both of home-based psychological intervention and  
11 combined home-based psychological intervention with exercise intervention in decreasing symptoms  
12 of depression and improving rates of remission. In addition, the combination of home-based  
13 psychological intervention and exercise intervention has the highest probability of being the best  
14 treatment out of all available home-based interventions. This approach should, therefore, be  
15 considered when formulating clinical guidelines for treating depression.  
16  
17  
18  
19

20  
21 **Contributors:** KS, PI, and TA were involved in the conception and design of the review. KS and TA  
22 developed the search strategy, performed study selection, extracted data from included studies and  
23 analyzed the data. KS, ML, PI, AD, AT and TA were involved in the interpretation and discussion of  
24 results. KS and TA drafted the manuscript. PI, AD, AT and TA revised it critically for important  
25 intellectual content. All authors approved the final version of the article. All authors had access to all  
26 of the data in the study and can take responsibility for the integrity of the data and the accuracy of the  
27 data analysis. TA is guarantor.  
28  
29  
30  
31  
32  
33

34  
35 **Funding:** This research did not receive a specific grant from any funding agency in the public,  
36 commercial, or not-for-profit sectors.  
37  
38

39  
40 **Competing interests:** All authors have completed the ICMJE uniform disclosure form at  
41 [www.icmje.org/coi\\_disclosure.pdf](http://www.icmje.org/coi_disclosure.pdf) and declare: no support from any organisation for the submitted  
42 work; no financial relationships with any organisations that might have an interest in the submitted  
43 work in the previous three years; no other relationships or activities that could appear to have  
44 influenced the submitted work.  
45  
46  
47  
48

49 **Ethical approval:** Not required.  
50

51  
52 **Data sharing:** No additional data available.  
53  
54  
55  
56  
57  
58  
59  
60

**Reference**

1. Ferrari AJ, Charlson FJ, Norman RE, et al. Burden of Depressive Disorders by Country, Sex, Age, and Year: Findings from the Global Burden of Disease Study 2010. *PLoS Med* 2013;**10**(11):e1001547.
2. Reddy MS. Depression: The Disorder and the Burden. *Indian J Psychol Med* 2010;**32**(1):1-2.
3. Penninx BW, Guralnik JM, Ferrucci L, et al. Depressive symptoms and physical decline in community-dwelling older persons. *JAMA* 1998;**279**(21):1720-6.
4. Rovner BW, German PS, Brant LJ, et al. Depression and mortality in nursing homes. *JAMA* 1991;**265**(8):993-6.
5. Unutzer J, Katon W, Callahan CM, et al. Collaborative care management of late-life depression in the primary care setting: a randomized controlled trial. *JAMA* 2002;**288**(22):2836-45.
6. Ciechanowski PS, Katon WJ, Russo JE. Depression and diabetes: impact of depressive symptoms on adherence, function, and costs. *Arch Intern Med* 2000;**160**(21):3278-85.
7. Frasure-Smith N, Lesperance F, Talajic M. Depression following myocardial infarction. Impact on 6-month survival. *JAMA* 1993;**270**(15):1819-25.
8. Katon W, Ciechanowski P. Impact of major depression on chronic medical illness. *J Psychosom Res* 2002;**53**(4):859-63.
9. Hunot VM, Horne R, Leese MN, et al. A Cohort Study of Adherence to Antidepressants in Primary Care: The Influence of Antidepressant Concerns and Treatment Preferences. *Primary Care Companion to The Journal of Clinical Psychiatry* 2007;**9**(2):91-99.
10. Churchill R, Khaira M, Grettton V, et al. Treating depression in general practice: factors affecting patients' treatment preferences. *The British journal of general practice : the journal of the Royal College of General Practitioners* 2000;**50**(460):905-6.
11. Riedel-Heller SG, Matschinger H, Angermeyer MC. Mental disorders--who and what might help? Help-seeking and treatment preferences of the lay public. *Social psychiatry and psychiatric epidemiology* 2005;**40**(2):167-74.
12. Jaycox LH, Miranda J, Meredith LS, et al. Impact of a primary care quality improvement intervention on use of psychotherapy for depression. *Mental health services research* 2003;**5**(2):109-20.

- 1  
2  
3 13. Mohr DC, Hart SL, Howard I, et al. Barriers to psychotherapy among depressed and  
4  
5 nondepressed primary care patients. *Annals of behavioral medicine : a publication of the*  
6  
7 *Society of Behavioral Medicine* 2006;**32**(3):254-8.
- 8  
9 14. Geerlings SW, Beekman AT, Deeg DJ, et al. Physical health and the onset and persistence of  
10  
11 depression in older adults: an eight-wave prospective community-based study. *Psychol Med*  
12  
13 2000;**30**(2):369-80.
- 14  
15 15. Schoevers RA, Beekman AT, Deeg DJ, et al. Risk factors for depression in later life; results of a  
16  
17 prospective community based study (AMSTEL). *J Affect Disord* 2000;**59**(2):127-37.
- 18  
19 16. Krishnan KR, George LK, Pieper CF, et al. Depression and social support in elderly patients with  
20  
21 cardiac disease. *Am Heart J* 1998;**136**(3):491-5.
- 22  
23 17. Prince MJ, Harwood RH, Thomas A, et al. A prospective population-based cohort study of the  
24  
25 effects of disablement and social milieu on the onset and maintenance of late-life depression.  
26  
27 The Gospel Oak Project VII. *Psychol Med* 1998;**28**(2):337-50.
- 28  
29 18. Banerjee S, Shamash K, Macdonald AJ, et al. Randomised controlled trial of effect of intervention  
30  
31 by psychogeriatric team on depression in frail elderly people at home. *BMJ (Clinical research*  
32  
33 *ed)* 1996;**313**(7064):1058-61.
- 34  
35 19. Bruce ML, Hoff RA. Social and physical health risk factors for first-onset major depressive disorder  
36  
37 in a community sample. *Soc Psychiatry Psychiatr Epidemiol* 1994;**29**(4):165-71.
- 38  
39 20. Zozula R, Rosen RC, Jahn EG, et al. Recognition of sleep disorders in a community-based setting  
40  
41 following an educational intervention. *Sleep Med* 2005;**6**(1):55-61.
- 42  
43 21. Choi NG, Hegel MT, Marti CN, et al. Telehealth problem-solving therapy for depressed low-  
44  
45 income homebound older adults. *American Journal of Geriatric Psychiatry* 2014;**22**(3):263-71.
- 46  
47 22. Gellis ZD, Bruce ML. Problem-solving therapy for subthreshold depression in home healthcare  
48  
49 patients with cardiovascular disease. *American Journal of Geriatric Psychiatry*  
50  
51 2010;**18**(6):464-74.
- 52  
53 23. Gellis ZD, McGinty J, Tierney L, et al. Randomized controlled trial of problem-solving therapy for  
54  
55 minor depression in home care. *Research on Social Work Practice* 2008;**18**(6):596-606.
- 56  
57 24. Gitlin LN, Harris LF, McCoy MC, et al. A home-based intervention to reduce depressive symptoms  
58  
59 and improve quality of life in older African Americans: A randomized trial. *Annals of Internal*  
60  
*Medicine* 2013;**159**(4):243-52.

- 1  
2  
3 25. Kiosses DN, Ravdin LD, Gross JJ, et al. Problem adaptation therapy for older adults with major  
4 depression and cognitive impairment: A randomized clinical trial. *JAMA Psychiatry*  
5 2015;**72**(1):22-30.  
6  
7  
8 26. Kerse N, Hayman KJ, Moyes SA, et al. Home-based activity program for older people with  
9 depressive symptoms: DeLLITE - A randomized controlled trial. *Annals of Family Medicine*  
10 2010;**8**(3):214-23.  
11  
12  
13 27. Pfaff JJ, Alfonso H, Newton RU, et al. ACTIVEDEP: A randomised, controlled trial of a home-  
14 based exercise intervention to alleviate depression in middle-aged and older adults. *British*  
15 *Journal of Sports Medicine* 2014;**48**(3):226-32.  
16  
17  
18 28. Klug G, Hermann G, Fuchs-Nieder B, et al. Effectiveness of home treatment for elderly people  
19 with depression: Randomised controlled trial. *British Journal of Psychiatry* 2010;**197**(6):463-  
20 67.  
21  
22  
23 29. Gellis ZD, McGinty J, Horowitz A, et al. Problem-solving therapy for late-life depression in home  
24 care: A randomized field trial. *American Journal of Geriatric Psychiatry* 2007;**15**(11):968-78.  
25  
26  
27 30. Gary RA, Dunbar SB, Higgins MK, et al. Combined exercise and cognitive behavioral therapy  
28 improves outcomes in patients with heart failure. *Journal of psychosomatic research*  
29 2010;**69**(2):119-31.  
30  
31  
32 31. Chaytor N, Ciechanowski P, Miller JW, et al. Long-term outcomes from the PEARLS randomized  
33 trial for the treatment of depression in patients with epilepsy. *Epilepsy and Behavior*  
34 2011;**20**(3):545-49.  
35  
36  
37 32. Rickhi B, Moritz S, Reesal R, et al. A spirituality teaching program for depression: a randomized  
38 controlled trial. *International journal of psychiatry in medicine* 2011;**42**(3):315-29.  
39  
40  
41 33. Badri R, Sabine M, Robin R, et al. A Spirituality Teaching Program for Depression: A Randomized  
42 Controlled Trial. *International Journal of Psychiatry in Medicine* 2011;**42**(3):315-29.  
43  
44  
45 34. Blumenthal JA, Babyak MA, Doraiswamy PM, et al. Exercise and pharmacotherapy in the  
46 treatment of major depressive disorder. *Psychosomatic medicine* 2007;**69**(7):587-96.  
47  
48  
49 35. Chung L, Tsai P, Liu B, et al. Home-based deep breathing for depression in patients with coronary  
50 heart disease: A randomised controlled trial. *International Journal of Nursing Studies*  
51 2010;**47**(11):1346-53.  
52  
53  
54  
55  
56  
57  
58  
59  
60



- 1  
2  
3 36. Ciechanowski P, Chaytor N, Miller J, et al. PEARLS depression treatment for individuals with  
4 epilepsy: A randomized controlled trial. *Epilepsy and Behavior* 2010;**19**(3):225-31.  
5  
6 37. Ciechanowski P, Wagner E, Schmaling K, et al. Community-Integrated Home-Based Depression  
7 Treatment in Older Adults: A Randomized Controlled Trial. *Journal of the American Medical*  
8 *Association* 2004;**291**(13):1569-77.  
9  
10 38. Naylor EV, Antonuccio DO, Litt M, et al. Bibliotherapy as a treatment for depression in primary  
11 care. *Journal of clinical psychology in medical settings* 2010;**17**(3):258-71.  
12  
13 39. Joling KJ, van Hout HP, van't Veer-Tazelaar PJ, et al. How effective is bibliotherapy for very old  
14 adults with subthreshold depression? A randomized controlled trial. *The American journal of*  
15 *geriatric psychiatry : official journal of the American Association for Geriatric Psychiatry*  
16 2011;**19**(3):256-65.  
17  
18 40. Higgins JPT, Altman DG, Gøtzsche PC, et al. The Cochrane Collaboration's tool for assessing risk  
19 of bias in randomised trials. *BMJ (Clinical research ed)* 2011;**343**.  
20  
21 41. Higgins JPT, Thompson SG, Deeks JJ, et al. Measuring inconsistency in meta-analyses. *BMJ :*  
22 *British Medical Journal* 2003;**327**(7414):557-60.  
23  
24 42. Caldwell DM, Ades AE, Higgins JP. Simultaneous comparison of multiple treatments: combining  
25 direct and indirect evidence. *BMJ (Clinical research ed)* 2005;**331**(7521):897-900.  
26  
27 43. Cohen J. *Statistical Power Analysis for the Behavioral Sciences*. Second ed. Hillsdale: Lawrence  
28 Erlbaum, 1988.  
29  
30 44. Faraone SV. Interpreting Estimates of Treatment Effects: Implications for Managed Care.  
31 *Pharmacy and Therapeutics* 2008;**33**(12):700-11.  
32  
33 45. Linde K, Sigterman K, Kriston L, et al. Effectiveness of Psychological Treatments for Depressive  
34 Disorders in Primary Care: Systematic Review and Meta-Analysis. *Annals of Family Medicine*  
35 2015;**13**(1):56-68.  
36  
37 46. Cuijpers P, van Straten A, van Schaik A, et al. Psychological treatment of depression in primary  
38 care: a meta-analysis. *British Journal of General Practice* 2009;**59**(559):e51-e60.  
39  
40 47. Krishna M, Lepping P, Jones S, et al. Systematic review and meta-analysis of group cognitive  
41 behavioural psychotherapy treatment for sub-clinical depression. *Asian journal of psychiatry*  
42 2015;**16**:7-16.  
43  
44  
45  
46  
47  
48  
49  
50  
51  
52  
53  
54  
55  
56  
57  
58  
59  
60

- 1  
2  
3 48. Murray CJ, Lopez AD. Alternative projections of mortality and disability by cause 1990-2020:  
4  
5 Global Burden of Disease Study. Lancet 1997;**349**(9064):1498-504.  
6  
7 49. Efthimiou O, Debray TP, van Valkenhoef G, et al. GetReal in network meta-analysis: a review of  
8  
9 the methodology. Research synthesis methods 2016;**7**(3):236-63.  
10  
11  
12  
13  
14  
15  
16  
17  
18  
19  
20  
21  
22  
23  
24  
25  
26  
27  
28  
29  
30  
31  
32  
33  
34  
35  
36  
37  
38  
39  
40  
41  
42  
43  
44  
45  
46  
47  
48  
49  
50  
51  
52  
53  
54  
55  
56  
57  
58  
59  
60

For peer review only

Table 1. Characteristics of included studies

| Author                | Setting     | Type of depression        | Participants |            |            |                  |             |                                  |                          | Study's intervention |                  |                                        |
|-----------------------|-------------|---------------------------|--------------|------------|------------|------------------|-------------|----------------------------------|--------------------------|----------------------|------------------|----------------------------------------|
|                       |             |                           | N            | Age (mean) | Female (%) | Living alone (%) | Married (%) | Baseline depression score (mean) | Anti-depressants use (%) | Type of intervention | Duration (weeks) | Comparison                             |
| Kiosses <sup>25</sup> | U.S.        | Major depressive disorder | 74           | 80.91      | 74.3       | NA               | NA          | 21.25 <sup>a</sup>               | 63.51                    | PST-HC               | 12 weeks         | Usual care with home visit             |
| Choi <sup>21</sup>    | U.S.        | Mixed depression          | 121          | 65.21      | 77.7       | 63.6             | NA          | 24.55 <sup>b</sup>               | NA                       | PST-HC               | 12 weeks         | Usual care with telephone support call |
| Gitlin <sup>24</sup>  | New Zealand | Mixed depression          | 208          | 69.57      | 78.4       | 56.8             | 12.0        | 13.01 <sup>c</sup>               | 19.3                     | PST-HC               | 16 weeks         | Usual care                             |
| Klug <sup>28</sup>    | Australia   | Major depressive disorder | 60           | 74.9       | 90.0       | 78.3             | NA          | 8.91 <sup>e</sup>                | 95                       | PST-HC               | 52 weeks         | Usual care                             |
| Gellis <sup>22</sup>  | U.S.        | Minor depression          | 36           | 75.9       | 91.6       | 88.9             | 8.3         | 18.05 <sup>b</sup>               | 0                        | PST-HC               | 6 weeks          | Usual care                             |
| Gellis <sup>29</sup>  | U.S.        | Minor depression          | 62           | 77.67      | 87.5       | 80.0             | 20.0        | 20.52 <sup>a</sup>               | NA                       | PST-HC               | 6 weeks          | Usual care with home visit             |

| Author                     | Setting     | Type of depression        | Participants |            |            |                  |             |                                  |                          | Study's intervention                                                        |                  |                            |
|----------------------------|-------------|---------------------------|--------------|------------|------------|------------------|-------------|----------------------------------|--------------------------|-----------------------------------------------------------------------------|------------------|----------------------------|
|                            |             |                           | N            | Age (mean) | Female (%) | Living alone (%) | Married (%) | Baseline depression score (mean) | Anti-depressants use (%) | Type of intervention                                                        | Duration (weeks) | Comparison                 |
| Naylor <sup>38</sup>       | U.S.        | Mixed depression          | 38           | 51.45      | 84.2       | NA               | NA          | 7.9 <sup>f</sup>                 | NA                       | Home-based CBT                                                              | 6 weeks          | Usual care                 |
| Joling <sup>39</sup>       | Netherlands | Minor depression          | 170          | 81.45      | 73.5       | NA               | 29.4        | 21.6                             | NA                       | Home-based CBT                                                              | 12 weeks         | Usual care                 |
| Pfaff <sup>27</sup>        | U.S.        | Mixed depression          | 200          | 60.97      | 63.0       | 21.6             | 53.0        | NA                               | 54.5                     | Home-based exercise                                                         | 12 weeks         | Usual care                 |
| Kerse <sup>26</sup>        | Austria     | Mixed depression          | 193          | 81.1       | 58.5       | 51.8             | NA          | 3.7 <sup>e</sup>                 | 26.4                     | Home-based exercise                                                         | 24 weeks         | Usual care with home visit |
| Blumenthal <sup>34</sup>   | U.S.        | Major depressive disorder | 102          | 52.52      | 74.5       | NA               | NA          | 16.52 <sup>b</sup>               | 0                        | Home-based exercise                                                         | 16 weeks         | Usual care                 |
| Ciechanowski <sup>36</sup> | U.S.        | Mixed depression          | 80           | 43.9       | 52.5       | NA               | 68.8        | 2.00 <sup>d</sup>                | 40%                      | Combined PST-HC with home-based exercise                                    | 19 weeks         | Usual care                 |
| Ciechanowski <sup>37</sup> | U.S.        | Minor depression          | 138          | 73         | 79         | 72.0             | 11.0        | 1.3 <sup>d</sup>                 | 51                       | Combined PST-HC with home-based exercise                                    | 19 weeks         | Usual care                 |
| Banerjee <sup>18</sup>     | Taiwan      | Mixed depression          | 69           | 80.71      | 82.9       | 78.3             | 15.9        | 26.25 <sup>a</sup>               | 11.39                    | Combined family therapy, bereavement counselling, social interventions with | 24 weeks         | Usual care                 |

1  
2  
3  
4  
5  
6  
7  
8  
9  
10  
11  
12  
13  
14  
15  
16  
17  
18  
19  
20  
21  
22  
23  
24  
25  
26  
27  
28  
29  
30  
31  
32  
33  
34  
35  
36  
37  
38  
39  
40  
41  
42  
43  
44  
45  
46  
47  
48  
49

| Author               | Setting | Type of depression        | Participants |            |            |                  |             |                                  | Study's intervention     |                                                                                       |                  |                                        |
|----------------------|---------|---------------------------|--------------|------------|------------|------------------|-------------|----------------------------------|--------------------------|---------------------------------------------------------------------------------------|------------------|----------------------------------------|
|                      |         |                           | N            | Age (mean) | Female (%) | Living alone (%) | Married (%) | Baseline depression score (mean) | Anti-depressants use (%) | Type of intervention                                                                  | Duration (weeks) | Comparison                             |
|                      |         |                           |              |            |            |                  |             |                                  |                          | home-based exercise                                                                   |                  |                                        |
| Gary <sup>30</sup>   | U.S.    | Mixed depression          | 74           | 65.8       | 57.1       | NA               | 39.2        | 20.7 <sup>f</sup>                | 29.7                     | Home-based CBT, home-based exercise, combined home-based CBT with home-based exercise | 12 weeks         | Usual care                             |
| Rickhi <sup>32</sup> | U.K.    | Major depressive disorder | 84           | 44.05      | 77.4       | NA               | 58.3        | 20.35 <sup>b</sup>               | 0                        | Spiritual teaching program                                                            | 8 weeks          | Usual care                             |
| Chung <sup>35</sup>  | U.S.    | Mixed depression          | 62           | 71.50      | 30.6       | NA               | NA          | 7.53 <sup>c</sup>                | 1.61                     | Home-based deep breathing exercise                                                    | 4 weeks          | Usual care with telephone support call |

<sup>a</sup>MADRS; <sup>b</sup>HAMD; <sup>c</sup>PHQ-9; <sup>d</sup>HSCL-20; <sup>e</sup>GDS; <sup>f</sup>BDI

PST-HC, problem solving therapy-home care; CBT, cognitive behavioural therapy

**Table 2.** Mean difference of depression score after treatment between intervention and control groups

| Author                                                 | Year | Follow up<br>time | Intervention |       |      | Control |       |      | Mean difference<br>(95% CI) |
|--------------------------------------------------------|------|-------------------|--------------|-------|------|---------|-------|------|-----------------------------|
|                                                        |      |                   | N            | Mean  | SD   | N       | Mean  | SD   |                             |
| <i>Home-based Psychological intervention</i>           |      |                   |              |       |      |         |       |      |                             |
| Kiosses <sup>25</sup>                                  | 2015 | 12 weeks          | 37           | 10.6  | 6.08 | 37      | 15.6  | 6.81 | -0.77 (0.30, -1.25)         |
| Choi <sup>21</sup>                                     | 2014 | 12 weeks          | 35           | 14.44 | 7.04 | 31      | 19.16 | 7.02 | -0.67 (-1.17, -0.17)        |
| Gitlin <sup>24</sup>                                   | 2013 | 16 weeks          | 106          | 6.4   | 6.18 | 102     | 8.9   | 6.06 | -0.41 (-0.13, -0.68)        |
| Joling <sup>39</sup>                                   | 2011 | 12 weeks          | 86           | 16.60 | 6.41 | 84      | 17.27 | 6.53 | -0.10 (-0.40, 0.20)         |
| Gary <sup>30</sup>                                     | 2010 | 12 weeks          | 17           | 8.2   | 6.3  | 15      | 9.3   | 4.9  | 0.19 (0.50, -0.89)          |
| Gellis <sup>22</sup>                                   | 2010 | 6 weeks           | 18           | 11.4  | 8.3  | 18      | 17.3  | 8.1  | 0.72 (-0.04, -1.39)         |
| Klug <sup>28</sup>                                     | 2010 | 48 weeks          | 29           | 6.11  | 3.00 | 29      | 10.43 | 4.2  | -1.18 (-0.62, -1.74)        |
| Naylor <sup>38</sup>                                   | 2010 | 6 weeks           | 15           | 4.40  | 5.30 | 18      | 4.90  | 5.30 | -0.09 (-0.78, 0.59)         |
| Gellis <sup>29</sup>                                   | 2007 | 6 weeks           | 30           | 8.11  | 4.3  | 32      | 13.64 | 5.6  | 1.10 (-0.57, -1.64)         |
| <b>SMD (95% CI)</b>                                    |      |                   |              |       |      |         |       |      | <b>-0.57 (-0.84, -0.31)</b> |
| <i>Home-based Exercise</i>                             |      |                   |              |       |      |         |       |      |                             |
| Kerse <sup>26</sup>                                    | 2010 | 24 weeks          | 94           | 2.4   | 0.2  | 92      | 3.1   | 0.3  | -2.75 (-2.35, -3.15)        |
| Gary <sup>30</sup>                                     | 2010 | 12 weeks          | 18           | 8.4   | 5.6  | 15      | 9.3   | 4.9  | -0.17 (0.52, -0.86)         |
| Blumenthal <sup>34</sup>                               | 2007 | 16 weeks          | 53           | 9.5   | 7.43 | 49      | 10.5  | 5.36 | -0.15 (0.24, -0.54)         |
| <b>SMD (95% CI)</b>                                    |      |                   |              |       |      |         |       |      | <b>-1.03 (-2.89, 0.82)</b>  |
| <i>Combine psychological intervention and exercise</i> |      |                   |              |       |      |         |       |      |                             |
| Gary <sup>30</sup>                                     | 2010 | 12 weeks          | 16           | 6.5   | 3.7  | 15      | 9.3   | 4.9  | -0.65 (0.08, -1.37)         |
| Ciechanowski <sup>37</sup>                             | 2004 | 24 weeks          | 72           | 0.71  | 0.6  | 66      | 1.17  | 0.53 | -0.81 (-0.46, -1.16)        |
| <b>SMD (95% CI)</b>                                    |      |                   |              |       |      |         |       |      | <b>-0.78 (-1.09, -0.47)</b> |

CI, confidence interval; SD, standard deviation; SMD, standardized mean difference

**Table 3.** Risk ratios of incidence of remission between intervention and control groups

| Author                                    | Year | Follow up time | Intervention |              | Control   |              | RR (95% CI)              |
|-------------------------------------------|------|----------------|--------------|--------------|-----------|--------------|--------------------------|
|                                           |      |                | Remission    | No Remission | Remission | No Remission |                          |
| <i>Home-based psychotherapy</i>           |      |                |              |              |           |              |                          |
| Kiosses <sup>25</sup>                     | 2015 | 12 weeks       | 14           | 23           | 5         | 32           | 2.80 (1.12, 6.98)        |
| Gitlin <sup>24</sup>                      | 2013 | 16 weeks       | 39           | 50           | 25        | 68           | 1.63 (1.08, 2.46)        |
| Joling <sup>39</sup>                      | 2011 | 12 weeks       | 31           | 55           | 25        | 59           | 1.47 (0.84, 2.55)        |
| Naylor <sup>38</sup>                      | 2010 | 6 weeks        | 11           | 4            | 9         | 9            | 1.21 (0.79, 1.87)        |
| <b>Pooled RR (95% CI)</b>                 |      |                |              |              |           |              | <b>1.53 (1.19, 1.98)</b> |
| <i>Home-based Exercise</i>                |      |                |              |              |           |              |                          |
| Ptaff <sup>27</sup>                       | 2014 | 12 weeks       | 49           | 29           | 40        | 28           | 1.07 (0.82-1.39)         |
| Blumenthal <sup>34</sup>                  | 2007 | 16 weeks       | 21           | 32           | 23        | 26           | 0.84 (0.54-1.32)         |
| <b>Pooled RR (95% CI)</b>                 |      |                |              |              |           |              | <b>0.99 (0.79, 1.24)</b> |
| <i>Combine psychotherapy and exercise</i> |      |                |              |              |           |              |                          |
| Ciechanowski <sup>36</sup>                | 2010 | 19 weeks       | 4            | 36           | 0         | 40           | 9.00 (0.50-161.86)       |
| Ciechanowski <sup>37</sup>                | 2004 | 19 weeks       | 30           | 42           | 6         | 60           | 4.58 (2.04-10.31)        |
| Banerjee <sup>18</sup>                    | 1996 | 24 weeks       | 19           | 10           | 9         | 23           | 2.33 (1.26-4.30)         |
| <b>Pooled RR (95% CI)</b>                 |      |                |              |              |           |              | <b>3.47 (2.11, 5.70)</b> |

CI, confidence interval; RR, risk ratio

1  
2  
3 **Figure legends**  
4

5 Figure 1. Flow chart of study selection  
6

7  
8 Figure 2. Network meta-analysis of disease remission among home-based interventions  
9  
10  
11  
12  
13  
14  
15  
16  
17  
18  
19  
20  
21  
22  
23  
24  
25  
26  
27  
28  
29  
30  
31  
32  
33  
34  
35  
36  
37  
38  
39  
40  
41  
42  
43  
44  
45  
46  
47  
48  
49  
50  
51  
52  
53  
54  
55  
56  
57  
58  
59  
60

For peer review only



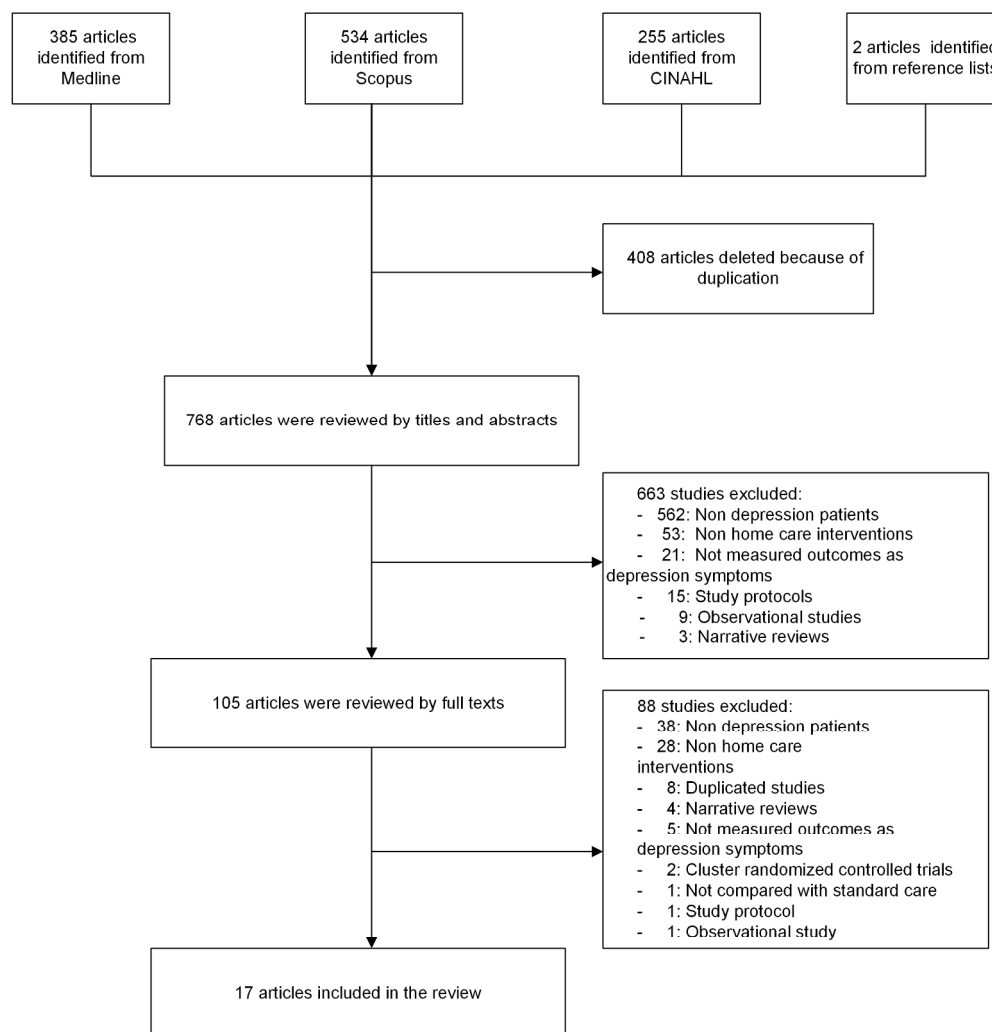

Figure 1. Flow chart of study selection

206x212mm (300 x 300 DPI)

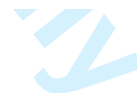

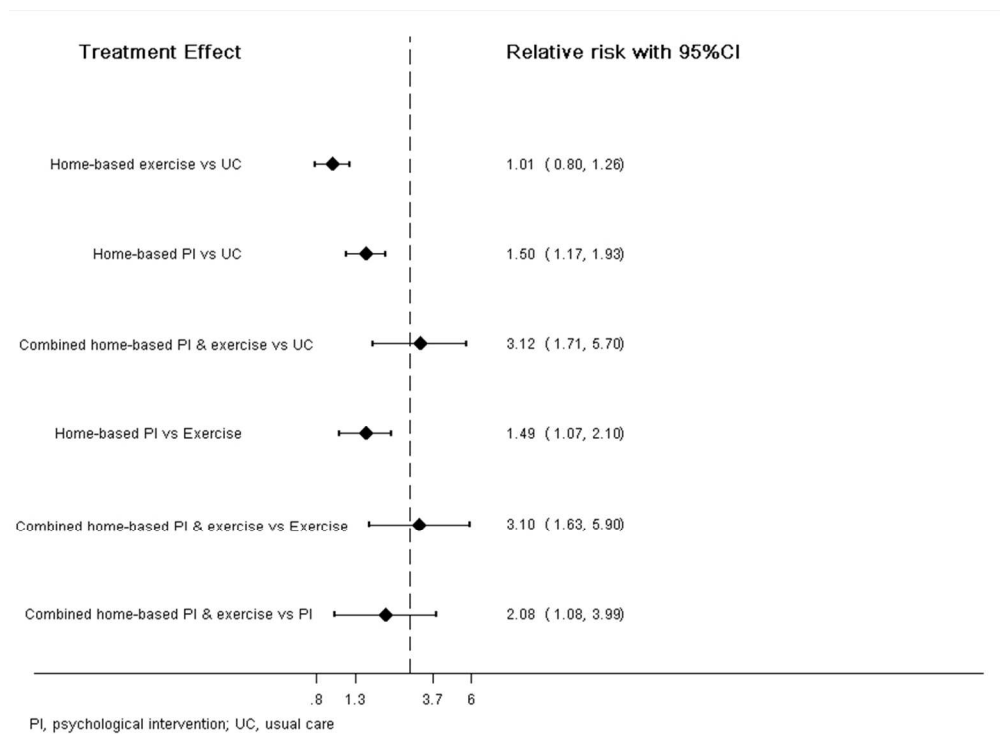

Figure 2. Network meta-analysis of disease remission among home-based interventions

305x222mm (72 x 72 DPI)

View only

1  
2  
3 **Supplementary Figure legends**  
4

5  
6 **Supplementary Figure 1.** Pooled standardized mean difference between home-based psychological  
7  
8 intervention and usual care according to severities of depression  
9

10  
11 **Supplementary Figure 2.** Pooled standardized mean difference between home-based exercise,  
12  
13 combined psychological intervention with exercise and usual care  
14

15  
16 **Supplementary Figure 3.** Pooled risk ratio of disease remission between home-based psychological  
17  
18 intervention and usual care  
19

20  
21 **Supplementary Figure 4.** Pooled risk ratio of disease remission between home-based exercise,  
22  
23 combined psychological intervention with exercise and usual care  
24

25  
26 **Supplementary Figure 5.** Network plot of all available home-based interventions  
27

28  
29 **Supplementary Figure 6.** Funnel plots of home-based psychological intervention and home-based  
30  
31 exercise  
32

33  
34 **Supplementary Figure 7.** Funnel and contour enhanced funnel plot of combined psychological  
35  
36 intervention with exercise  
37  
38  
39  
40  
41  
42  
43  
44  
45  
46  
47  
48  
49  
50  
51  
52  
53  
54  
55  
56  
57  
58  
59  
60

Supplementary Figure 1

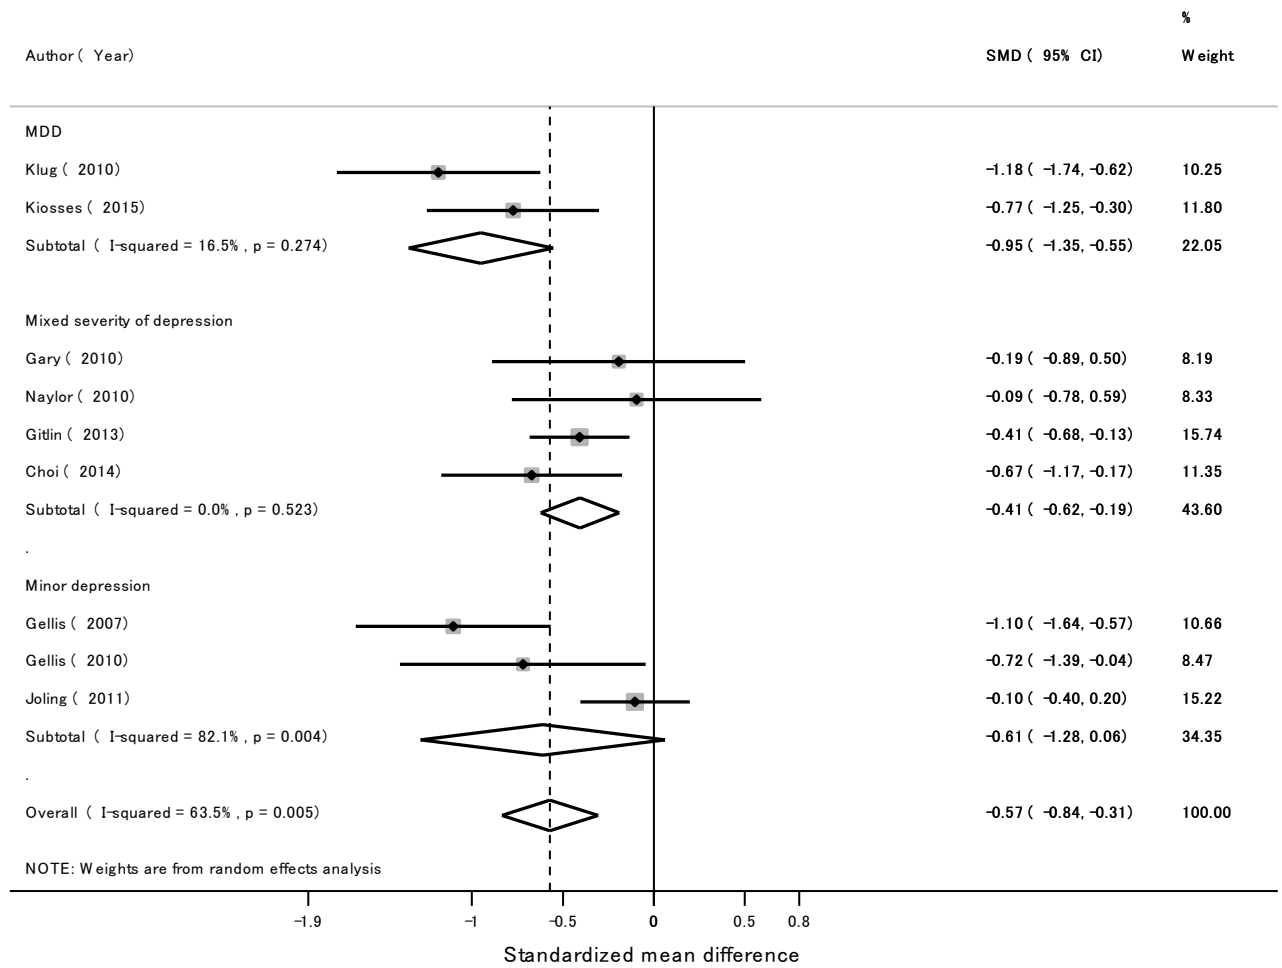

For peer review only

Supplementary Figure 2

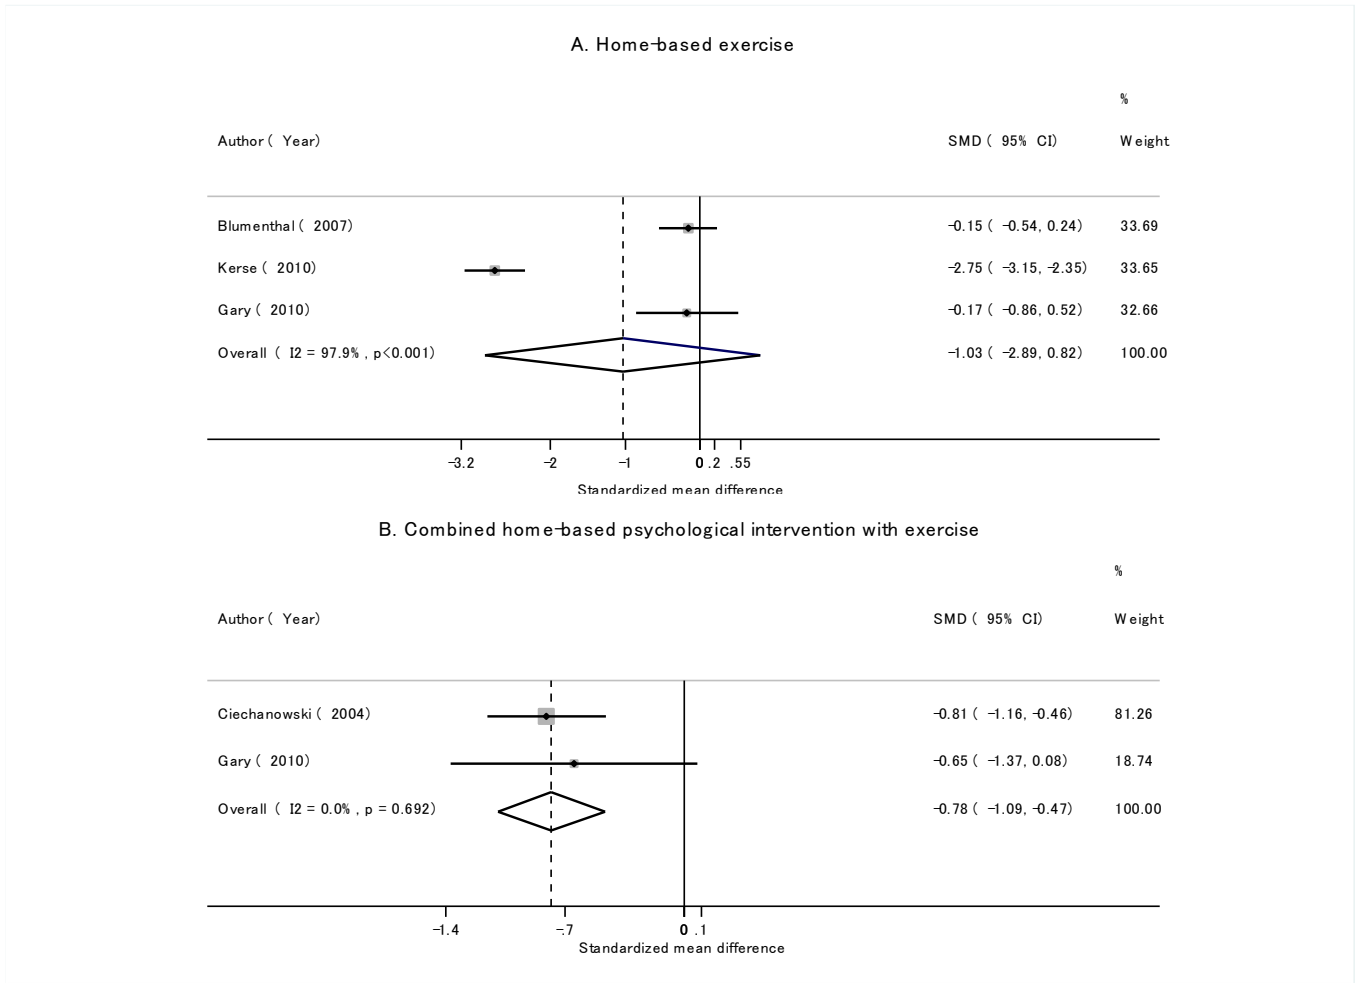

Peer review only

Supplementary Figure 3

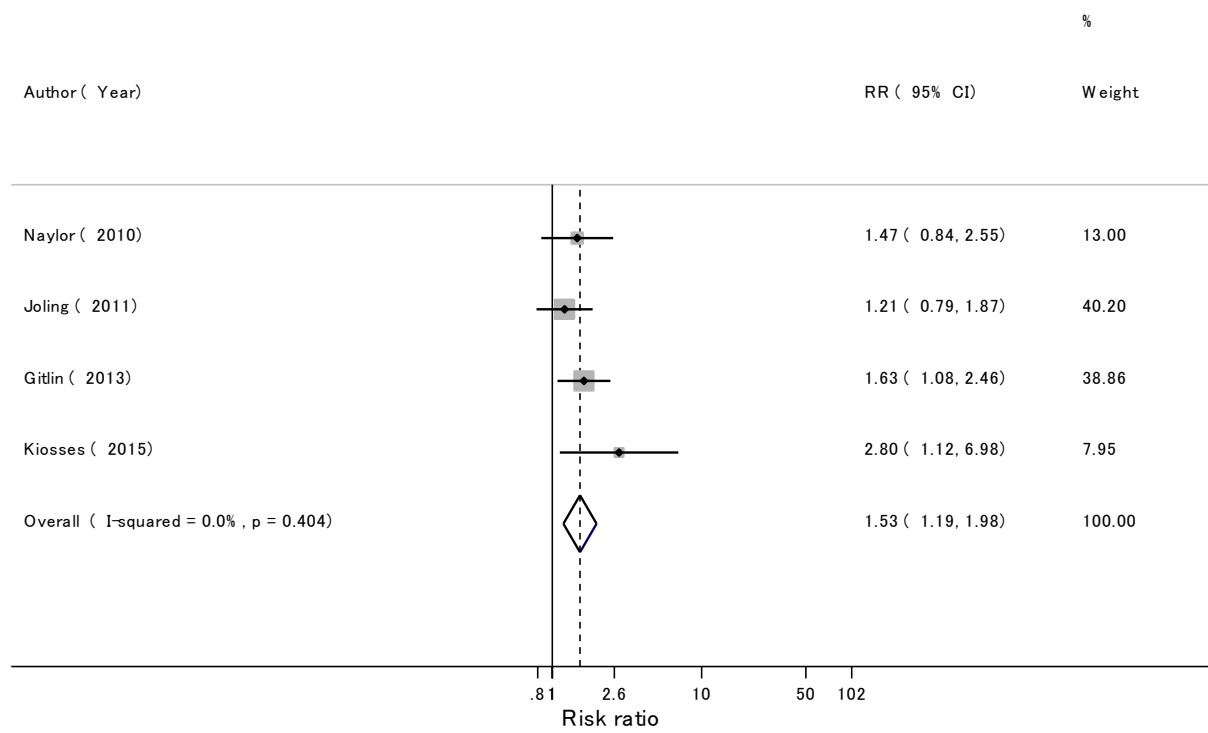

Review only

Supplementary Figure 4

A. Home-based exercise

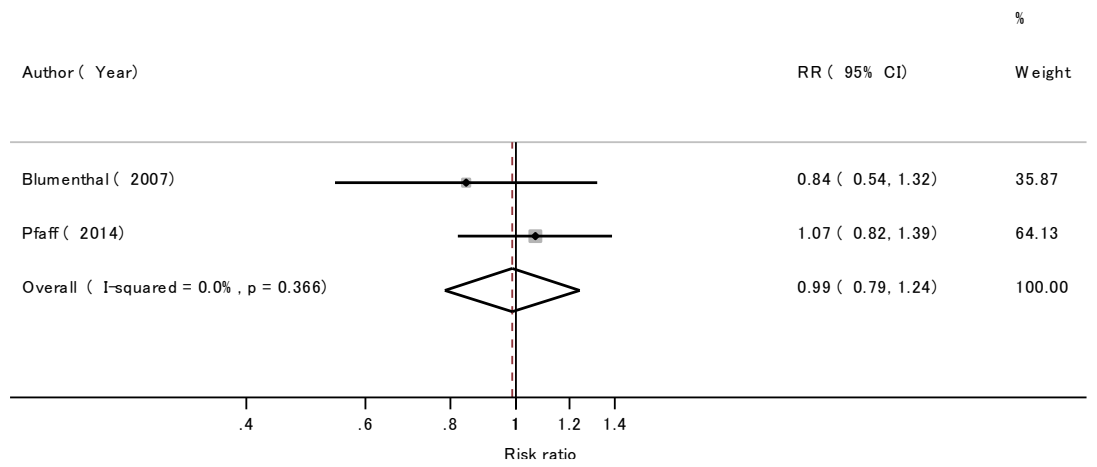

B. Combined home-based psychological intervention with exercise

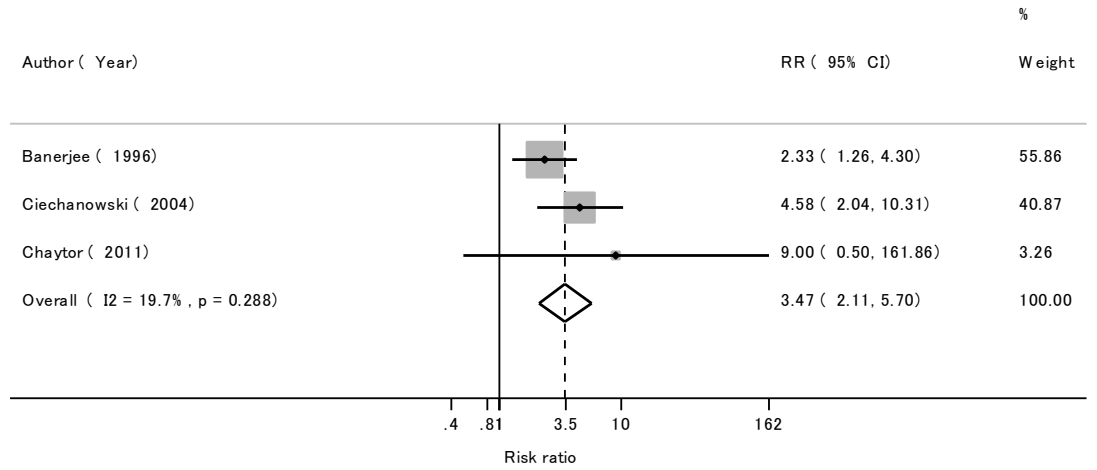

Only

Supplementary Figure 5

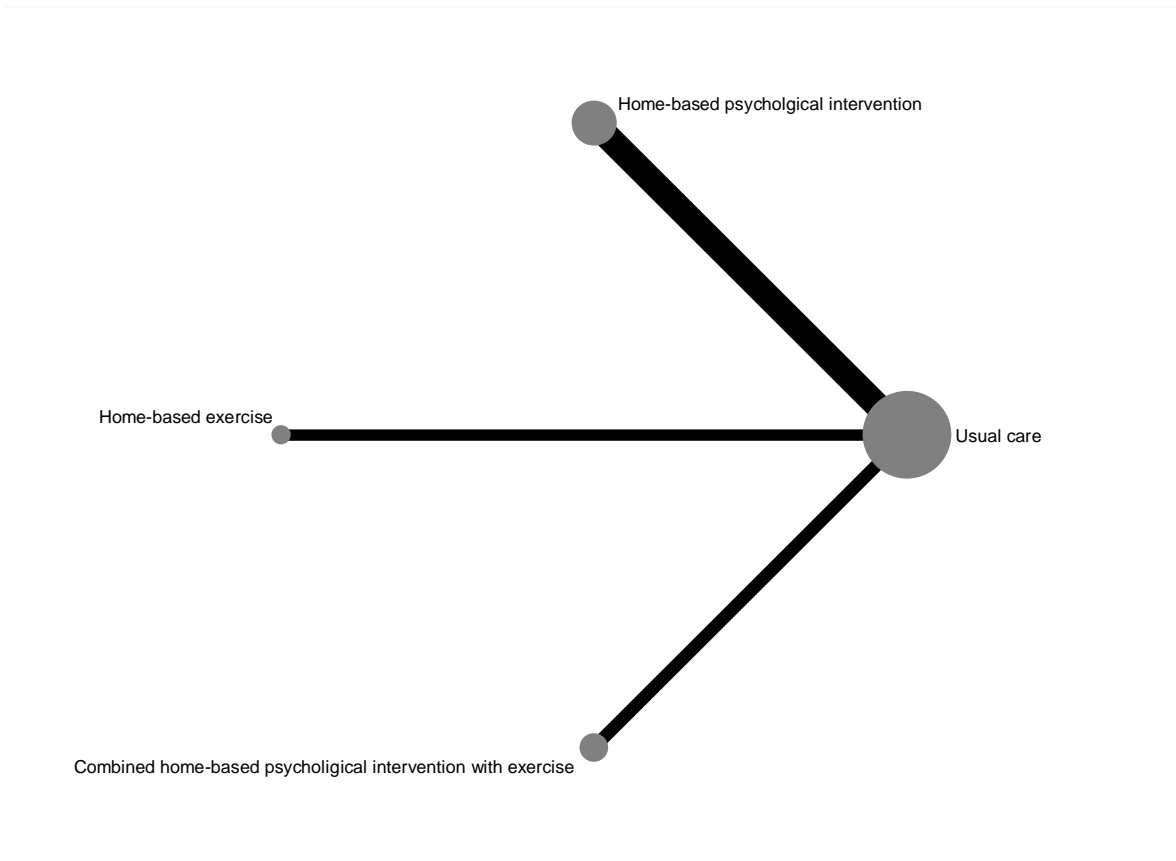

Review only

1  
2  
3  
4  
5  
6  
7  
8  
9  
10  
11  
12  
13  
14  
15  
16  
17  
18  
19  
20  
21  
22  
23  
24  
25  
26  
27  
28  
29  
30  
31  
32  
33  
34  
35  
36  
37  
38  
39  
40  
41  
42  
43  
44  
45  
46  
47  
48  
49  
50  
51  
52  
53  
54  
55  
56  
57  
58  
59  
60



1  
2  
3  
4  
5  
6  
7  
8  
9  
10  
11  
12  
13  
14  
15  
16  
17  
18  
19  
20  
21  
22  
23  
24  
25  
26  
27  
28  
29  
30  
31  
32  
33  
34  
35  
36  
37  
38  
39  
40  
41  
42  
43  
44  
45  
46  
47  
48  
49  
50  
51  
52  
53  
54  
55  
56  
57  
58  
59  
60

Supplementary Figure 6

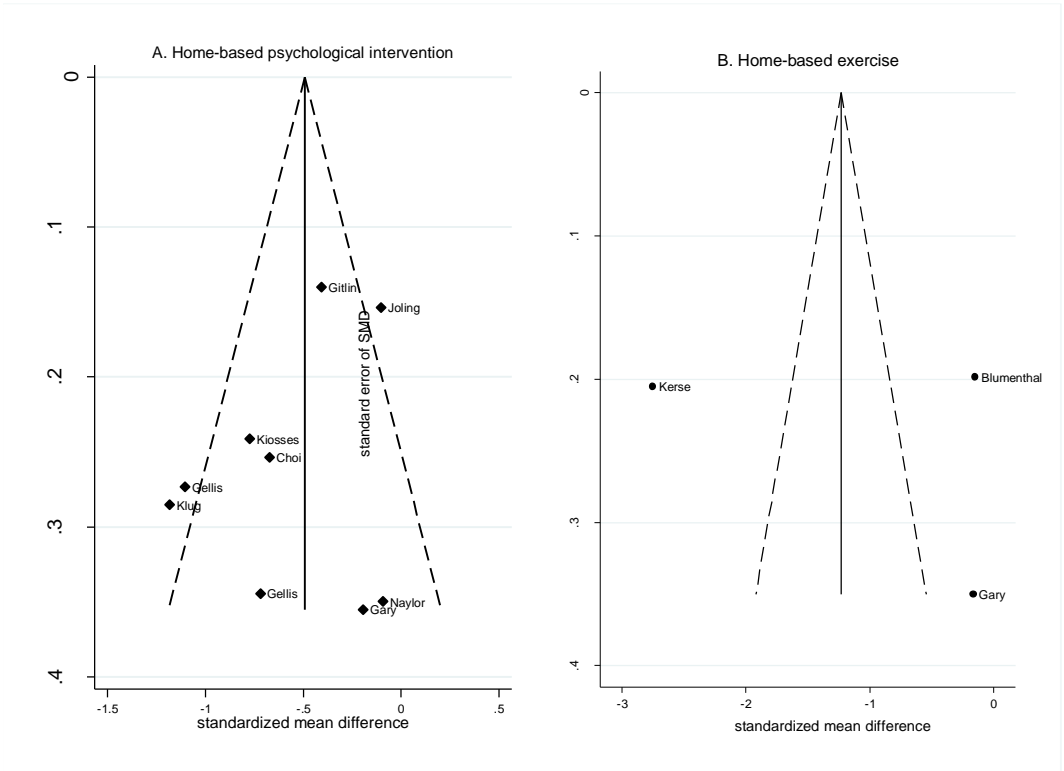

review only

Supplementary Figure 7

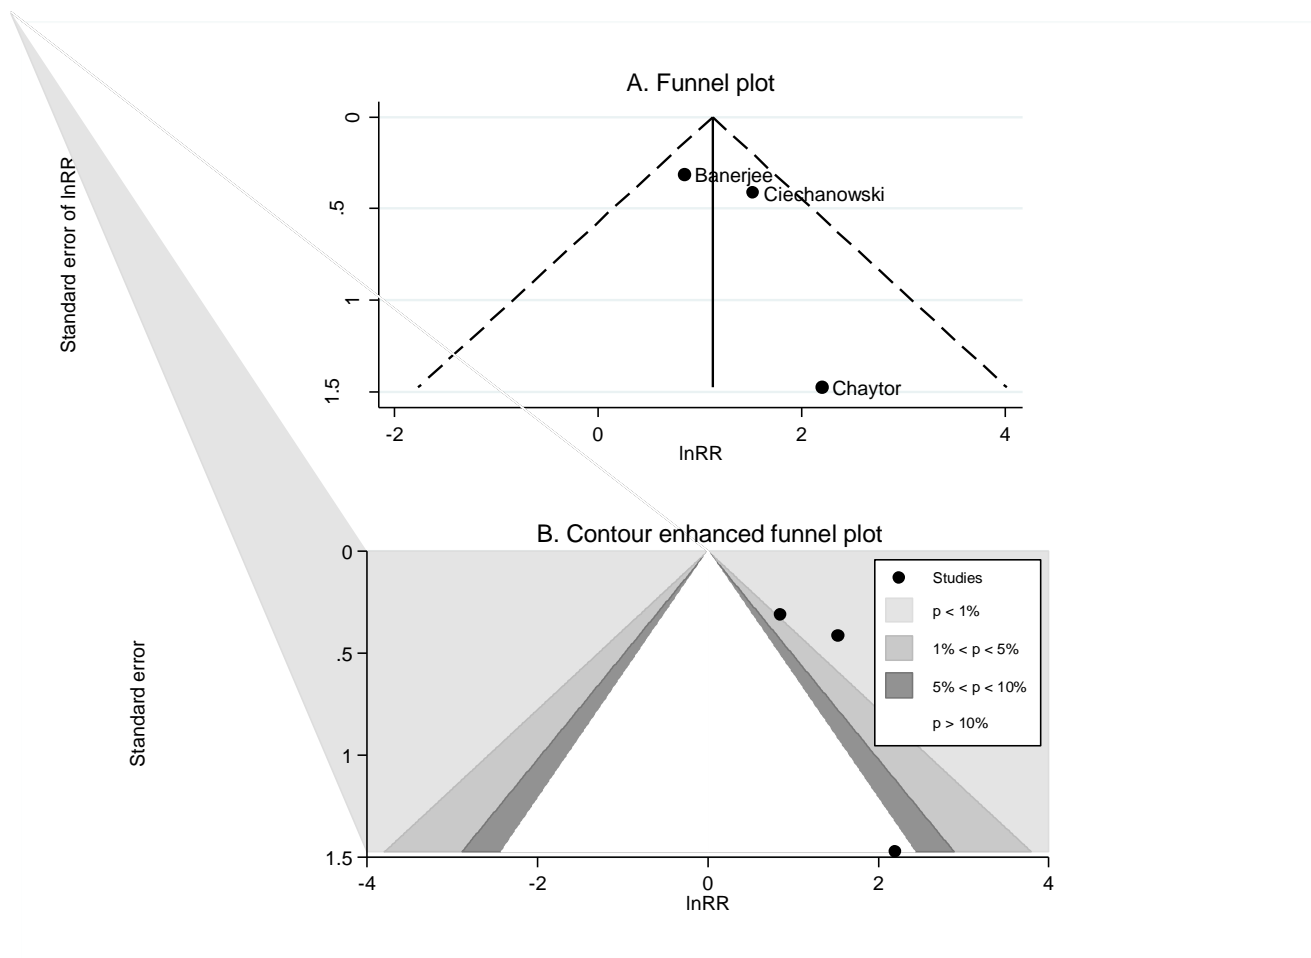

new only

1  
2  
3  
4  
5  
6  
7  
8  
9  
10  
11  
12  
13  
14  
15  
16  
17  
18  
19  
20  
21  
22  
23  
24  
25  
26  
27  
28  
29  
30  
31  
32  
33  
34  
35  
36  
37  
38  
39  
40  
41  
42  
43  
44  
45  
46  
47

Supplementary Table 1. Risk of bias assessment

| Author (Year) | Year | Random sequence generation | Allocation concealment | Blinding of participants and personnel | Blinding of outcome assessors | Incomplete outcome data | Selective outcome reporting | Other bias | Power of study |
|---------------|------|----------------------------|------------------------|----------------------------------------|-------------------------------|-------------------------|-----------------------------|------------|----------------|
| Rickhi        | 2011 | Low                        | Low                    | High                                   | Low                           | Low                     | Low                         | Low        | Low            |
| Banerjee      | 1996 | Low                        | Unclear                | High                                   | Low                           | Low                     | Low                         | Low        | Unclear        |
| Blumenthal    | 2007 | Low                        | Low                    | High                                   | Low                           | Low                     | Low                         | Low        | Low            |
| Choi          | 2014 | Unclear                    | Unclear                | High                                   | Unclear                       | High                    | Low                         | Low        | Unclear        |
| Chung         | 2010 | Low                        | Low                    | High                                   | unclear                       | High                    | Low                         | Low        | Unclear        |
| Ciechanowski  | 2010 | Low                        | Low                    | High                                   | Low                           | Low                     | High                        | Low        | Unclear        |
| Ciechanowski  | 2004 | Low                        | Low                    | High                                   | Unclear                       | Low                     | Low                         | Low        | Unclear        |
| Gary          | 2010 | Unclear                    | Unclear                | High                                   | Low                           | Low                     | Low                         | Low        | Unclear        |
| Gellis        | 2010 | Unclear                    | Unclear                | High                                   | Low                           | Low                     | Low                         | Low        | Unclear        |
| Gellis        | 2008 | Low                        | Unclear                | High                                   | Low                           | Low                     | Low                         | Low        | Unclear        |
| Gitlin        | 2013 | Low                        | Low                    | High                                   | Unclear                       | Low                     | Low                         | Low        | Low            |
| Kerse         | 2010 | Low                        | Unclear                | High                                   | Low                           | Low                     | Low                         | Low        | Low            |
| Kiosses       | 2015 | Low                        | Unclear                | High                                   | Low                           | Low                     | Low                         | Low        | Low            |
| Klug          | 2010 | Low                        | Unclear                | High                                   | Unclear                       | High                    | Low                         | Low        | Low            |
| Pfaff         | 2014 | Low                        | Unclear                | High                                   | Low                           | Low                     | Low                         | Low        | High           |
| Joling        | 2011 | Low                        | Unclear                | High                                   | Unclear                       | Low                     | Low                         | Low        | Unclear        |
| Naylor        | 2010 | Low                        | Unclear                | High                                   | Unclear                       | High                    | Low                         | Low        | Unclear        |

Supplementary Table 2. Characteristics of studies included in network meta-analysis

| Author                                       |              | Type of depression        | Participants |            |            |                  |             |                                  |                          | Study's intervention |                            |
|----------------------------------------------|--------------|---------------------------|--------------|------------|------------|------------------|-------------|----------------------------------|--------------------------|----------------------|----------------------------|
|                                              |              |                           | N            | Age (mean) | Female (%) | Living alone (%) | Married (%) | Baseline depression score (mean) | Anti-depressants use (%) | Duration (weeks)     | Comparator                 |
| <b>Home-based Psychological intervention</b> |              |                           |              |            |            |                  |             |                                  |                          |                      |                            |
| Kiosses                                      | Intervention | Major depressive disorder | 37           | 80.78      | 70.27      | NA               | NA          | 21.08 <sup>a</sup>               | 64.86                    | 12 weeks             | Usual care with home visit |
|                                              | Control      |                           | 37           | 81.03      | 78.38      | NA               | NA          | 21.41 <sup>a</sup>               | 62.16                    |                      |                            |
| Gitlin                                       | Intervention | Mixed depression          | 106          | 68.9       | 79.3       | 47.32            | 15.1        | 13.65 <sup>c</sup>               | 22.6                     | 16 weeks             | Usual care                 |
|                                              | Control      |                           | 102          | 70.3       | 77.5       | 66.7             | 8.8         | 12.9 <sup>c</sup>                | 15.8                     |                      |                            |
| Naylor                                       | Intervention | Mixed depression          | 19           | 48.6       | 94.7       | NA               | NA          | 8.3 <sup>f</sup>                 | NA                       | 6 weeks              | Usual care                 |
|                                              | Control      |                           | 19           | 54.3       | 73.7       | NA               | NA          | 7.5 <sup>f</sup>                 | NA                       |                      |                            |
| Joling                                       | Intervention | Minor depression          | 86           | 81.8       | 69.8       | NA               | 30.2        | 21.17 <sup>g</sup>               | NA                       | 12 weeks             | Usual care                 |
|                                              | Control      |                           | 84           | 81.1       | 77.4       | NA               | 28.6        | 22.05 <sup>g</sup>               | NA                       |                      |                            |
| <b>Home-based Exercise</b>                   |              |                           |              |            |            |                  |             |                                  |                          |                      |                            |
| Pfaff                                        | Intervention | Mixed depression          | 108          | 61.2       | 62         | 22.4             | 48.1        | NA                               | 60.2                     | 12 weeks             | Usual care                 |
|                                              | Control      |                           | 92           | 60.7       | 64.1       | 20.7             | 58.7        | NA                               | 47.8                     |                      |                            |
| Blumenthal                                   | Intervention | Major depressive disorder | 53           | 53         | 74         | NA               | NA          | 17+/-5 <sup>b</sup>              | 0                        | 16 weeks             | Usual care                 |
|                                              | Control      |                           | 49           | 52         | 75         | NA               | NA          | 16+/-4 <sup>b</sup>              | 0                        |                      |                            |

| Author                                                                     |              | Type of depression | Participants |            |            |                  |             |                                  |                          | Study's intervention |            |
|----------------------------------------------------------------------------|--------------|--------------------|--------------|------------|------------|------------------|-------------|----------------------------------|--------------------------|----------------------|------------|
|                                                                            |              |                    | N            | Age (mean) | Female (%) | Living alone (%) | Married (%) | Baseline depression score (mean) | Anti-depressants use (%) | Duration (weeks)     | Comparator |
| <b><i>Combined home-based psychological intervention with exercise</i></b> |              |                    |              |            |            |                  |             |                                  |                          |                      |            |
| Ciechanowski                                                               | Intervention | Mixed depression   | 40           | 43.4       | 47.5       | NA               | 65          | 2.1 <sup>d</sup>                 | 37.5                     | 19 weeks             | Usual care |
|                                                                            | Control      |                    | 40           | 44.1       | 57.5       | NA               | 72.5        | 1.9 <sup>d</sup>                 | 42.5                     |                      |            |
| Ciechanowski                                                               | Intervention | Minor depression   | 72           | 72.6       | 82         | 78               | 11.0        | 1.3 <sup>d</sup>                 | 40                       | 19 weeks             | Usual care |
|                                                                            | Control      |                    | 66           | 73.5       | 76         | 65               | 11.0        | 1.2 <sup>d</sup>                 | 30                       |                      |            |
| Banerjee                                                                   | Intervention | Mixed depression   | 33           | 80.4       | 85         | 82               | 18          | 27.5 <sup>a</sup>                | 11                       | 24 weeks             | Usual care |
|                                                                            | Control      |                    | 36           | 81         | 81         | 75               | 14          | 25.1 <sup>a</sup>                | 12                       |                      |            |

<sup>a</sup>MADRS; <sup>b</sup>HAMD; <sup>c</sup>PHQ-9; <sup>d</sup>HSCL-20; <sup>e</sup>GDS; <sup>f</sup>BDI

## Supplementary Appendix

### Search strategy for Medline

(Depressive OR depression OR depressed) AND ("Home Care Services"[MeSH] OR "Home Care Agencies"[MeSH] OR "Home Nursing"[MeSH] OR "House Calls"[MeSH] OR "Community Health Planning"[MeSH] OR "Health Systems Agencies"[MeSH] OR "Community Health Nursing"[MeSH] OR "Social Support"[MeSH]) OR ("Home Based" OR "home support" OR ("home treatment" OR "home treatments") OR "home care" OR ("home visits" OR "Home visit") OR ("Health visits" OR "Health visit") OR ("home service" OR "home services")) Filters: Randomized Controlled Trial

### Search strategy for Scopus

(Depressive OR depression OR depressed) AND ("Home Based" OR "home support" OR ("home treatment" OR "home treatments") OR "home care" OR ("home visits" OR "Home visit") OR ("Health visits" OR "Health visit") OR ("home service" OR "home services") OR "home health care")

CINAHL

### Search strategy for CINAHL

(depressive OR depression OR depressed) AND ("Home Based" OR "home support" OR ("home treatment" OR "home treatments") OR "home care" OR ("home visits" OR "Home visit") OR ("Health visits" OR "Health visit") OR ("home service" OR "home services") OR "home health care") AND (randomized OR randomized)

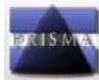

# PRISMA 2009 Checklist

| Section/topic                      | #  | Checklist item                                                                                                                                                                                                                                                                                              | Reported on page #     |
|------------------------------------|----|-------------------------------------------------------------------------------------------------------------------------------------------------------------------------------------------------------------------------------------------------------------------------------------------------------------|------------------------|
| <b>TITLE</b>                       |    |                                                                                                                                                                                                                                                                                                             |                        |
| Title                              | 1  | Identify the report as a systematic review, meta-analysis, or both.                                                                                                                                                                                                                                         | 1                      |
| <b>ABSTRACT</b>                    |    |                                                                                                                                                                                                                                                                                                             |                        |
| Structured summary                 | 2  | Provide a structured summary including, as applicable: background; objectives; data sources; study eligibility criteria, participants, and interventions; study appraisal and synthesis methods; results; limitations; conclusions and implications of key findings; systematic review registration number. | 3                      |
| <b>INTRODUCTION</b>                |    |                                                                                                                                                                                                                                                                                                             |                        |
| Rationale                          | 3  | Describe the rationale for the review in the context of what is already known.                                                                                                                                                                                                                              | 5                      |
| Objectives                         | 4  | Provide an explicit statement of questions being addressed with reference to participants, interventions, comparisons, outcomes, and study design (PICOS).                                                                                                                                                  | 5, 6                   |
| <b>METHODS</b>                     |    |                                                                                                                                                                                                                                                                                                             |                        |
| Protocol and registration          | 5  | Indicate if a review protocol exists, if and where it can be accessed (e.g., Web address), and, if available, provide registration information including registration number.                                                                                                                               | -                      |
| Eligibility criteria               | 6  | Specify study characteristics (e.g., PICOS, length of follow-up) and report characteristics (e.g., years considered, language, publication status) used as criteria for eligibility, giving rationale.                                                                                                      | 6, 7                   |
| Information sources                | 7  | Describe all information sources (e.g., databases with dates of coverage, contact with study authors to identify additional studies) in the search and date last searched.                                                                                                                                  | 6                      |
| Search                             | 8  | Present full electronic search strategy for at least one database, including any limits used, such that it could be repeated.                                                                                                                                                                               | Supplementary Appendix |
| Study selection                    | 9  | State the process for selecting studies (i.e., screening, eligibility, included in systematic review, and, if applicable, included in the meta-analysis).                                                                                                                                                   | 6                      |
| Data collection process            | 10 | Describe method of data extraction from reports (e.g., piloted forms, independently, in duplicate) and any processes for obtaining and confirming data from investigators.                                                                                                                                  | 7                      |
| Data items                         | 11 | List and define all variables for which data were sought (e.g., PICOS, funding sources) and any assumptions and simplifications made.                                                                                                                                                                       | 7                      |
| Risk of bias in individual studies | 12 | Describe methods used for assessing risk of bias of individual studies (including specification of whether this was done at the study or outcome level), and how this information is to be used in any data synthesis.                                                                                      | 8                      |
| Summary measures                   | 13 | State the principal summary measures (e.g., risk ratio, difference in means).                                                                                                                                                                                                                               | 8                      |
| Synthesis of results               | 14 | Describe the methods of handling data and combining results of studies, if done, including measures of consistency (e.g., $I^2$ ) for each meta-analysis.                                                                                                                                                   | 8                      |

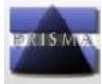

# PRISMA 2009 Checklist

Page 1 of 2

| Section/topic                 | #  | Checklist item                                                                                                                                                                                           | Reported on page #                                          |
|-------------------------------|----|----------------------------------------------------------------------------------------------------------------------------------------------------------------------------------------------------------|-------------------------------------------------------------|
| Risk of bias across studies   | 15 | Specify any assessment of risk of bias that may affect the cumulative evidence (e.g., publication bias, selective reporting within studies).                                                             | 9                                                           |
| Additional analyses           | 16 | Describe methods of additional analyses (e.g., sensitivity or subgroup analyses, meta-regression), if done, indicating which were pre-specified.                                                         | 8                                                           |
| <b>RESULTS</b>                |    |                                                                                                                                                                                                          |                                                             |
| Study selection               | 17 | Give numbers of studies screened, assessed for eligibility, and included in the review, with reasons for exclusions at each stage, ideally with a flow diagram.                                          | 9, Figure 1                                                 |
| Study characteristics         | 18 | For each study, present characteristics for which data were extracted (e.g., study size, PICOS, follow-up period) and provide the citations.                                                             | 9, 10, 11, 12 & Table 1                                     |
| Risk of bias within studies   | 19 | Present data on risk of bias of each study and, if available, any outcome level assessment (see item 12).                                                                                                | 12 & Supplementary Table 1                                  |
| Results of individual studies | 20 | For all outcomes considered (benefits or harms), present, for each study: (a) simple summary data for each intervention group (b) effect estimates and confidence intervals, ideally with a forest plot. | Tables 2 & 3<br>Figure 2<br>Supplementary Figure 1, 2, 3, 4 |
| Synthesis of results          | 21 | Present results of each meta-analysis done, including confidence intervals and measures of consistency.                                                                                                  | 12-16                                                       |
| Risk of bias across studies   | 22 | Present results of any assessment of risk of bias across studies (see Item 15).                                                                                                                          | 16                                                          |
| Additional analysis           | 23 | Give results of additional analyses, if done (e.g., sensitivity or subgroup analyses, meta-regression [see Item 16]).                                                                                    | 12-16                                                       |
| <b>DISCUSSION</b>             |    |                                                                                                                                                                                                          |                                                             |
| Summary of evidence           | 24 | Summarize the main findings including the strength of evidence for each main outcome; consider their relevance to key groups (e.g., healthcare providers, users, and policy makers).                     | 16-19                                                       |
| Limitations                   | 25 | Discuss limitations at study and outcome level (e.g., risk of bias), and at review-level (e.g., incomplete retrieval of identified research, reporting bias).                                            | 18                                                          |
| Conclusions                   | 26 | Provide a general interpretation of the results in the context of other evidence, and implications for future research.                                                                                  | 19                                                          |
| <b>FUNDING</b>                |    |                                                                                                                                                                                                          |                                                             |
| Funding                       | 27 | Describe sources of funding for the systematic review and other support (e.g., supply of data); role of funders for the systematic review.                                                               | 19                                                          |



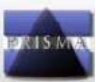

# PRISMA 2009 Checklist

1  
2  
3  
4  
5  
6  
7  
8  
9  
10  
11  
12  
13  
14  
15  
16  
17  
18  
19  
20  
21  
22  
23  
24  
25  
26  
27  
28  
29  
30  
31  
32  
33  
34  
35  
36  
37  
38  
39  
40  
41  
42  
43  
44  
45  
46  
47  
48  
49

From: Moher D, Liberati A, Tetzlaff J, Altman DG, The PRISMA Group (2009). Preferred Reporting Items for Systematic Reviews and Meta-Analyses: The PRISMA Statement. PLoS Med 6(6): e1000097. doi:10.1371/journal.pmed1000097

For more information, visit: [www.prisma-statement.org](http://www.prisma-statement.org).

Page 2 of 2

For peer review only

# BMJ Open

## Efficacy of home-based non-pharmacological interventions for treating depression: a systematic review and network meta-analysis of randomized-controlled trials

|                                 |                                                                                                                                                                                                                                                                                                                                                                                                                                                                                                                                                                                                                                                                                |
|---------------------------------|--------------------------------------------------------------------------------------------------------------------------------------------------------------------------------------------------------------------------------------------------------------------------------------------------------------------------------------------------------------------------------------------------------------------------------------------------------------------------------------------------------------------------------------------------------------------------------------------------------------------------------------------------------------------------------|
| Journal:                        | <i>BMJ Open</i>                                                                                                                                                                                                                                                                                                                                                                                                                                                                                                                                                                                                                                                                |
| Manuscript ID                   | bmjopen-2016-014499.R2                                                                                                                                                                                                                                                                                                                                                                                                                                                                                                                                                                                                                                                         |
| Article Type:                   | Research                                                                                                                                                                                                                                                                                                                                                                                                                                                                                                                                                                                                                                                                       |
| Date Submitted by the Author:   | 17-May-2017                                                                                                                                                                                                                                                                                                                                                                                                                                                                                                                                                                                                                                                                    |
| Complete List of Authors:       | Sukhato, Kanokporn; Faculty of Medicine, Ramathibodi Hospital, Mahidol university, Department of Family Medicine<br>Lotrakul, Manoch; Faculty of Medicine, Ramathibodi Hospital, Mahidol university, Department of Psychiatry<br>Dellow, Alan; Faculty of Medicine, Ramathibodi Hospital, Mahidol university<br>Ittasakul, Pichai ; Faculty of Medicine, Ramathibodi Hospital, Mahidol university, Department of Psychiatry<br>Thakkinstian, Ammarin; Faculty of Medicine Ramathibodi Hospital, Mahidol University, Section for Clinical Epidemiology and Biostatistics<br>Anothaisintawee, Thunyarat; Ramathibodi Hospital, Mahidol University, Department of family medicine |
| <b>Primary Subject Heading</b>: | Mental health                                                                                                                                                                                                                                                                                                                                                                                                                                                                                                                                                                                                                                                                  |
| Secondary Subject Heading:      | Evidence based practice, General practice / Family practice                                                                                                                                                                                                                                                                                                                                                                                                                                                                                                                                                                                                                    |
| Keywords:                       | depression, treatment, home-based intervention, systematic review, network meta-analysis                                                                                                                                                                                                                                                                                                                                                                                                                                                                                                                                                                                       |
|                                 |                                                                                                                                                                                                                                                                                                                                                                                                                                                                                                                                                                                                                                                                                |

SCHOLARONE™  
Manuscripts

1  
2  
3 **Efficacy of home-based non-pharmacological interventions for treating depression:**  
4 **a systematic review and network meta-analysis of randomized-controlled trials**  
5  
6  
7

8 Kanokporn Sukhato, M.D.

9  
10 Department of Family Medicine, Faculty of Medicine, Ramathibodi Hospital, Mahidol University,  
11 Bangkok, Thailand  
12

13  
14  
15 Manote Lotrakul, M.D.

16  
17 Department of Psychiatry, Faculty of Medicine, Ramathibodi Hospital, Mahidol University, Bangkok,  
18 Thailand  
19  
20

21  
22  
23 Alan Dellow, M.Med.Ed, FRCGP

24 Faculty of Medicine, Ramathibodi Hospital, Mahidol University, Bangkok, Thailand  
25  
26  
27

28  
29 Pichai Ittasakul, M.D.

30 Department of Psychiatry, Faculty of Medicine, Ramathibodi Hospital, Mahidol University, Bangkok,  
31 Thailand  
32  
33

34  
35  
36 Ammarin Thakkinstian, Ph.D.

37  
38 Section for Clinical Epidemiology & Biostatistics, Faculty of Medicine, Ramathibodi Hospital, Mahidol  
39 University, Bangkok, Thailand  
40  
41

42  
43 Thunyarat Anothaisintawee, M.D., Ph.D.

44  
45 Department of Family Medicine, Faculty of Medicine, Ramathibodi Hospital, Mahidol University,  
46 Bangkok, Thailand  
47  
48

49  
50  
51 **Corresponding author:** Thunyarat Anothaisintawee

52  
53 **Postal address:** Department of Family Medicine, Ramathibodi Hospital, 270 Rama VI Road,  
54 Ratchatewi, Bangkok, Thailand 10400  
55

56 **Tel:** +6622011406  
57  
58  
59  
60

1  
2  
3 **Fax:** +6622011486

4 **Email:** [thunyarat.ano@mahidol.ac.th](mailto:thunyarat.ano@mahidol.ac.th)

5  
6 **Key words:** depression; treatment; home-based intervention; systematic review; network meta-  
7  
8 analysis  
9

10 **Word count:** 5,694 words  
11  
12  
13  
14  
15  
16  
17  
18  
19  
20  
21  
22  
23  
24  
25  
26  
27  
28  
29  
30  
31  
32  
33  
34  
35  
36  
37  
38  
39  
40  
41  
42  
43  
44  
45  
46  
47  
48  
49  
50  
51  
52  
53  
54  
55  
56  
57  
58  
59  
60

For peer review only

**Abstract:**

**Objectives:** To systematically review and compare the efficacy of all available home-based non-pharmacological treatments of depression.

**Design:** Systematic review and network meta-analysis of randomized controlled trials.

**Data sources:** Medline, Scopus, and CINAHL databases were searched since inception to 7<sup>th</sup> August 2016.

**Eligibility criteria:** Randomized controlled trials comparing the efficacy of home-based non-pharmacological interventions with usual care of depressed patients were included in the review.

**Main outcomes:** Depression symptom scores and disease remission rates at the end of treatment.

**Results:** Seventeen studies were included in the review. Home-based non-pharmacological interventions were categorized as 1) home-based psychological intervention, 2) home-based exercise intervention, 3) combined home-based psychological intervention with exercise intervention, and 4) complimentary or alternative medicine. Complementary and alternative medicine approaches were excluded from the meta-analysis due to heterogeneity. The standardized mean differences of post-treatment depression symptom scores between usual care groups and home-based psychological intervention, home-based exercise intervention, and combined home-based psychological intervention with exercise intervention were -0.57 (95%CI:-0.84, -0.31), -1.03 (95%CI:-2.89, 0.82), and -0.78 (95% CI:-1.09,-0.47), respectively. These results suggest that only home-based psychological intervention and combined home-based psychological intervention with exercise intervention could significantly decrease depression scores. Compared with usual care groups, the disease remission rate was also significantly higher for home-based psychological intervention (pooled risk ratio = 1.53; 95% CI: 1.19, 1.98) and combined home-based psychological intervention with exercise intervention (pooled risk ratio = 3.47; 95% CI: 2.11, 5.70). Of all the studied interventions, combined home-based psychological intervention with exercise intervention had the highest probability of resulting in disease remission.

**Conclusion:** Our study confirms the efficacy of home-based psychological intervention and combined home-based psychological intervention with exercise intervention in the treatment of depression.

1  
2  
3 Combined home-based psychological intervention and exercise intervention was the best treatment  
4 and should be considered for inclusion in clinical guidelines for managing depression.  
5  
6

### 7 **Strengths and limitations of this study**

- 9 • Our analysis provides the first comprehensive review of the efficacy of home-based non-  
10 pharmacological interventions in treating depression.  
11
- 12 • A comprehensive search was undertaken to identify as many relevant studies as possible.  
13
- 14 • We performed a network meta-analysis to compare the efficacy of home-based interventions  
15 in order to identify the best treatment regimen.  
16
- 17 • The quality of included studies in the area of allocation concealment was not optimal.  
18
- 19 • Participants in our included studies were aware of their own interventions and the outcomes  
20 were subjective.  
21  
22  
23  
24  
25  
26  
27  
28  
29  
30  
31  
32  
33  
34  
35  
36  
37  
38  
39  
40  
41  
42  
43  
44  
45  
46  
47  
48  
49  
50  
51  
52  
53  
54  
55  
56  
57  
58  
59  
60

## INTRODUCTION

Recent studies have highlighted the international recognition of depression as one of the leading global burdens of disease (GBD)<sup>1</sup>. Depression is associated not only with greater morbidity and mortality but also with increasing health service use and costs<sup>2</sup>. In addition, untreated depression has been recognized as a strong predictor of poor health outcomes in elderly<sup>3-5</sup> and adult patients with chronic disease<sup>6-8</sup>.

Both pharmacological and non-pharmacological interventions, such as psychotherapy or supervised exercise intervention, have been accepted as standard treatments of depression. However, concerns about drug side effects and dependency appear to make patients prefer psychological interventions. One study showed that around 70% of depressed patients were non-compliant with antidepressants because of concerns about their side effects<sup>9</sup>. Even though non-pharmacological interventions were preferred over antidepressants<sup>10 11</sup>, only a very small percentage of patients referred for psychotherapy were able to enter and complete this treatment<sup>12</sup>. This inconsistency between patient preference and low rates of initiation and adherence to treatment could be a consequence of barriers to obtaining treatment. Non-pharmacological interventions are usually clinic or hospital-based and require visits on a weekly or monthly basis. In one study, 70% of patients reported structural barriers preventing them from attending psychotherapy sessions regularly and cited time constraints, transportation problems and cost as being significant obstacles<sup>13</sup>.

Among older patients, whose prevalent rate of depression is very high, these problems were aggravated by concurrent medical illness, social isolation, functional impairment or being home-bound<sup>14-20</sup>. Overcoming these barriers by providing interventions in patients' own homes may achieve better treatment adherence and thereby greater treatment success than clinic or hospital-based interventions.

Home-based non-pharmacological interventions, such as problem solving therapy<sup>21-25</sup> and home-based exercise intervention<sup>26 27</sup>, have developed over several years. Although some studies have suggested that these approaches can improve depressive symptoms and rates of remission when compared with standard usual care<sup>26 28 29</sup>, other studies have reported conflicting results<sup>27 30 31</sup>. In recent years new home-based interventions have been introduced to treat depression, such as spirituality teaching programme<sup>32</sup> and combined home-based psychotherapy with exercise intervention but their efficacy is still controversial. Therefore, our systematic review and network meta-

1  
2  
3 analysis was undertaken with the aim of reviewing all available home-based non-pharmacological  
4 interventions, pooling the effect sizes of each intervention on symptom improvement and indirectly  
5 comparing treatment efficacy between the different interventions. The results of this review should be  
6 useful for identifying the most beneficial home-based non-pharmacological interventions and for  
7 informing clinical guidelines for treating depression.  
8  
9  
10

## 11 **METHODS**

### 12 **Search strategy**

13  
14  
15 Relevant studies were identified using Medline, Scopus, and CINAHL databases searched  
16 from inception to 7<sup>th</sup> August 2016. Reference lists of included studies were also explored. Search  
17 terms and search strategies for each database are presented in a Supplementary Appendix.  
18  
19  
20  
21

### 22 **Selection of studies**

23  
24  
25 Initially studies were selected from titles and abstracts by two independent reviewers (K.S.  
26 and T.A.). Full articles were retrieved to aid decision making if decision could not be made based on  
27 titles and abstracts. Disagreement between the two reviewers was resolved by discussion.  
28 Percentage agreement between the two reviewers was estimated using kappa statistics.  
29  
30  
31  
32

### 33 **Inclusion criteria**

34  
35  
36 Randomized-controlled trials published in English were eligible for the review if they met all of  
37 the following criteria:  
38  
39

- 40 1. Study participants were adults aged more than 18 years with a diagnosis of any degree of  
41 depressive disorder using the criteria of the Diagnostic and Statistical Manual of Mental  
42 Disorders 4th Edition (DSM-IV) or any diagnostic tool used for diagnosis or screening for  
43 depression. Participants who were children, adolescents or postpartum women were  
44 excluded.  
45  
46  
47  
48  
49
- 50 2. Interventions of interest were non-pharmacological and provided in the patient's home, such  
51 as cognitive behavioral therapy, problem solving therapy, family therapy, or home-based  
52 exercise intervention.  
53  
54
- 55 3. Treatment comparison was the care of depression in outpatient clinics or hospital settings.  
56  
57  
58  
59  
60



4. Outcomes were measured by the level or severity of depressive symptoms or the incidence of disease remission at the end of the intervention.
5. Studies provided sufficient data for analysis, such as number of participants (n), mean depression score, standard deviation (SD) for each intervention group, and the number of patients per intervention group with or without disease remission.

### Data extraction

Two reviewers (KS and TA) independently used a standardized data record form to extract baseline characteristics of included studies and outcomes of interest. Disagreement between the two reviewers was resolved by discussion and corresponding authors of studies were contacted if information was incomplete.

### Interventions of interest

Home-based non-pharmacological intervention was defined as any care or management of depression provided by health care professionals at a patient's place of residence. Home-based interventions had to have a clear and definite objective. Home visits that provided only health-education, social or emotional support were, therefore, excluded from this study.

Web or internet-based interventions were excluded from this review due to their variability in terms of content, accessibility, usability, methods of delivery and supplementary tools<sup>33</sup>.

### Outcomes of interest

The outcomes of interest were depressive symptom scores and disease remission rates at the end of treatment. Disease remission was defined according to the criteria of the original article. Included studies used several tools for measuring the severity of depressive symptoms, namely the Hamilton Depression Rating Scale (HAM-D)<sup>21 22 30 34 35</sup>, Patient Health Questionnaire-9 (PHQ-9)<sup>24 36</sup>, Geriatric Depression Scale (GDS)<sup>23 26 28</sup>, Hopkins Symptom Checklist-20 (HSCL-20)<sup>37 38</sup>, Montgomery Asberg Depression Rating Scale (MADRS)<sup>18 25 27</sup>, Beck Depression Inventory-Fast Screen (BDI-FS)<sup>39</sup> and Center of Epidemiologic Studies Depression Scale (CES-D)<sup>40</sup>. These tools have different score ranges (HAM-D = 0-53, PHQ-9 = 0-27, GDS = 0-15, HSCL-20 = 0-4, MADRS = 0-60, BDI-FS = 0-21, and CES-D = 0-60) with higher scores in all tools representing increasing severity of depressive symptoms.

### Risk of bias assessment

To assess the quality of included studies, a risk of bias assessment tool<sup>41</sup> was applied by two independent reviewers (K.S., T.A.). Seven domains were evaluated as follows: 1) random sequence generation 2) allocation concealment 3) blinding of participants and personnel 4) blinding of outcome assessors 5) incomplete outcome data 6) selective outcome reporting 7) other sources of bias. The quality of the studies was classified as being at high, unclear, or low risk of bias. We added the domain of power to determine the likelihood of any studies making a true difference to outcome, classifying any study as being at high risk of bias if it reported a power less than 80%. Disagreement between the two reviewers was settled by discussion.

### Statistical analysis

Because depression scores were measured differently among the studies, for direct comparison the standardized mean differences (SMD) of depressive scores between intervention and control groups were estimated for individual studies and then were pooled across studies. Heterogeneity between studies was estimated by Q test and  $I^2$  statistic. Heterogeneity between studies was considered if the P-value from Q test was less than 0.10 or if  $I^2$  was equal to or greater than 25%<sup>42</sup>. If heterogeneity was presented, the SMD was estimated by applying the random effect model. Otherwise the fixed effect model was applied.

For dichotomous outcomes, relative risks (RR) of disease remission were calculated for each study. The random effect model was used for pooling RR if there was evidence of heterogeneity between studies. Otherwise the inverse variance method was used. Sources of heterogeneity were explored by considering possible factors one by one in a meta-regression model (e.g. mean age, severity of depression at baseline and types of intervention delivery).

A network meta-analysis was applied to indirectly assess intervention effects for all home-based interventions, i.e., home-based psychological intervention, home-based exercise intervention, combined home-based psychological intervention and exercise intervention, and usual care. This method allows us to perform indirect comparison using common comparator. For instance, some studies compared home-based psychological intervention with usual care, some others compared home-based exercise intervention with usual care, non or few studies compared home-based

1  
2  
3 psychological intervention with home-based exercise intervention. Using common comparator as  
4 usual care would allow to indirectly compare home-based psychological intervention with home-based  
5 exercise intervention<sup>43</sup>. Treatment effects for each study were estimated using a two-stage network  
6 meta-analysis. Firstly, summary data was expanded into individual patient data using the 'expand'  
7 command in STATA program. Binary regression was applied to estimate log (RR) and variance-  
8 covariance of each treatment using 'mvmeta' make command. A multivariate random effect meta-  
9 analysis was used to calculate the pooled RRs and their 95% confidence intervals (CI). Riley's  
10 method was used for considering subject-study correlation. Treatment ranking was made according to  
11 the linear predictor of each study. In addition, a consistency assumption (i.e., discrepancy of  
12 intervention effects between direct and indirect meta-analyses) was assessed using the standardized  
13 normal test (Z).  
14  
15  
16  
17  
18  
19  
20  
21  
22  
23

24 Publication bias was assessed using Egger test and funnel plot. If the funnel plot showed  
25 asymmetry, a contour enhanced funnel plot was performed to explore whether asymmetry was the  
26 result of heterogeneity between studies or arisen from publication bias. All analyses were performed  
27 using STATA version 14. A two-sided test with P-value less than 0.05 was considered statistically  
28 significant, except for the Q test, in which a P-value less than 0.10 was applied.  
29  
30  
31  
32  
33

### 34 Patient involvement

35  
36 Patients were not involved in the design of the study, development of outcome measures, or  
37 conduct of the study. We did not ask patients for advice on interpreting or writing up results. There are  
38 no plans to disseminate the results of the research to study participants.  
39  
40  
41

### 42 RESULTS

43  
44 We identified 385, 534, 255, and 2 articles from Medline, Scopus, CINAHL databases and  
45 reference lists respectively. After deleting duplications, the titles and abstracts of 768 studies were  
46 reviewed. Finally, 17 studies met our inclusion criteria and were eligible in the review (Figure 1).  
47 Agreement of study selection between the two reviewers was high at 86.7% (Kappa = 0.50). All but  
48 one<sup>18</sup> of the included studies reported protocol approval by an ethics committee.  
49  
50  
51  
52  
53  
54  
55  
56  
57  
58  
59  
60

## Study participants

The baseline characteristics of included studies are presented in Table 1. The type and severity of depression of participants differed between studies. Four studies<sup>25 28 34 35</sup> included patients with major depressive disorder, four<sup>22 23 38 40</sup> included patients with minor depression and nine<sup>18 21 24 26 27 30 36 37 39</sup> included patients with mixed severities of depression. Ten studies included elderly patients<sup>18 21-26 28 38 40</sup> while seven studies included adults with ages greater than 18 years<sup>27 30 34-37 39</sup>. Ten studies included depressed patients with other co-morbidities (i.e. epilepsy<sup>37</sup>, heart diseases<sup>22 30 36</sup>, disability<sup>18</sup>, and mild to moderate cognitive impairment<sup>25</sup>). Twelve studies<sup>21 23 24 26-28 34 35 38-40</sup> included patients without co-morbidity. Use of anti-depressants at baseline varied widely between studies, ranging from 0% to 95%.

## Home-based interventions

The composition of home-based non-pharmacological interventions differed among the included studies but could be categorized into 4 groups: 1) home-based psychological intervention 2) home-based exercise intervention 3) combined home-based psychological intervention with home-based exercise intervention 4) complementary or alternative medicine. Eight, 3 and 3 studies compared home-based psychological intervention with usual care, home-based exercise intervention with usual care, and combined home-based psychological intervention with home-based exercise intervention with usual care, respectively. One study compared the efficacy between home-based psychological intervention, home-based exercise intervention, combined home-based psychological intervention with home-based exercise intervention, and usual care. Since interventions in the category of complementary or alternative medicine were heterogeneous, they were not included in the meta-analysis but were subjected to qualitative analysis. Details of each home-based intervention are summarized below:

### ***Home-based psychological intervention***

Home-based psychological intervention was classified as home-based problem-solving treatment or home-based cognitive behavioral therapy.

1. *Home-based problem-solving treatment* (6 studies<sup>21 22 24 25 28 29</sup>)

1  
2  
3 Home-based problem-solving treatment (PST) is a skill-enhancing behavioral treatment of  
4 depression usually delivered by social workers and psychologists. This approach assumes that  
5 depressive symptoms are caused and maintained by problems of daily life and that these can be  
6 reduced by identifying and addressing them systematically. Each PST session comprises 1) defining  
7 and formulating the nature of the depressive problem 2) generating a range of alternative solutions to  
8 the problem 3) systematically evaluating the possible consequences of each solution then selecting  
9 the most appropriate one 4) monitoring and evaluating the actual outcome. In addition, PST identifies  
10 patients' pleasurable activities and encourages them to participate in these activities.  
11  
12  
13  
14  
15  
16  
17

18 2. *Home-based cognitive behavioral therapy* (CBT) (3 studies<sup>30 39 40</sup>)  
19

20 The aim of CBT is to modify the dysfunctional emotions, behaviours, and thoughts of  
21 depressed patients. This type of intervention was identified in 3 studies, of which 2 studies were CBT-  
22 based bibliotherapy. In this approach, participants received self-help books or leaflets that included  
23 instruction on cognitive behavioral self-help, mood management skills, and tasks to practice. During  
24 the intervention period, participants were visited by home care nurses or contacted by telephone by  
25 study investigators to assess their symptoms and encourage them to follow the course at their own  
26 pace.  
27  
28  
29  
30  
31  
32

33  
34 ***Home-based exercise intervention***  
35

36 Home-based exercise intervention was employed in 4 studies. Exercise included both  
37 progressive resistance training, aerobic exercise<sup>26 27</sup> and aerobic exercise only<sup>30 35</sup>. Participants were  
38 required to perform exercises of moderate-intensity for at least 30 minutes three times a week.  
39  
40  
41  
42

43 ***Combined home-based psychological intervention with exercise intervention***  
44

45 Home-based psychological intervention combined with exercise intervention was the  
46 interested intervention in 4 studies. Each of these applied aerobic exercise as a home-based exercise  
47 intervention but psychological therapies differed among them (PST in two studies<sup>37 38</sup>, cognitive  
48 behavioral therapy in one study<sup>30</sup> and family therapy with bereavement counselling and social  
49 interventions in one study<sup>18</sup>).  
50  
51  
52  
53  
54

55 ***Complementary or alternative medicine***  
56  
57  
58  
59  
60

1  
2  
3 This intervention refers to a broad set of health care practices or activities that are not  
4 integrated into the dominant health care system. This type of intervention was used in 2 studies. One  
5 involved home-based deep-breathing exercise<sup>36</sup> aimed at stimulating a relaxation response, (i.e. to  
6 decrease arousal, heart rate and blood pressure, and to reduce responsiveness of the sympathetic  
7 nervous system). Deep-breathing exercises can also help patients to disregard negative and  
8 distracting thoughts. Patients were trained by experienced nurses to breathe at a rate of six breaths  
9 per minute. During the treatment period, this was undertaken in a quiet environment for a period of  
10 ten minutes, three times each day.  
11  
12  
13  
14  
15  
16  
17

18 The other intervention employed a spirituality teaching programme<sup>32</sup> aiming to promote  
19 contemplation of the inter-relation between meaning and purpose, connectedness with others, nature  
20 or the divine, and values such as compassion, love, justice, and forgiveness. The programme  
21 comprised eight sessions involving explanation of the divine aspect of the self, teaching breathing and  
22 visualization practice, helping patients to connect with the divine through prayer or meditation, letting  
23 go of regret and fostering gratitude, practicing self-awareness relating to the five senses, and building  
24 upon connectedness with others. Participants were also advised to avoid forming expectations and to  
25 refrain from judging outcomes. Initially patients participated in a workshop run by psychiatrists and  
26 were then required to practice by themselves with the help of audio CDs.  
27  
28  
29  
30  
31  
32  
33  
34  
35

### 36 **Treatment comparison**

37  
38 Usual care was defined as the care of depression managed by health care providers (i.e.  
39 general practitioners, psychiatrists, nurses or social workers) and could include onward referral to  
40 appropriate treatment services if specified in the study protocol. In addition to usual care, three  
41 studies<sup>25 26 29</sup> included home visits and two<sup>21 36</sup> included telephone support. However, these  
42 interventions provided education about depression together with general social or emotional support  
43 but did not offer specific psychological help or exercise intervention. With the exception of one  
44 study<sup>32</sup>, almost all used anti-depressant medication as a co-intervention but the decision to initiate or  
45 maintain this was dependent on the judgments of patients and their physicians.  
46  
47  
48  
49  
50  
51  
52

### 53 **Risk of bias assessment**

1  
2  
3 Results of risk of bias assessment are presented in Supplementary Table 1. Most of the  
4 studies (14 studies) reported low risk of bias in the domain of random sequence generation, while 3  
5 studies<sup>21 22 30</sup> reported unclear risk. For allocation concealment, 11 studies<sup>18 21 22 25-30 39 40</sup> had unclear  
6 risk of bias, while 6 studies<sup>24 32 35-38</sup> had low risk of bias. All studies reported high risk of bias in the  
7 domain of blinding of participants and personnel and low risk of bias in other domains. Ten studies<sup>18,22</sup>  
8 <sup>25-27 29 30 32 35 37</sup> had low risk of bias for blinding of outcome assessors, whereas 7 studies<sup>21 24 28 36 38-40</sup>  
9 had unclear risk. For the domain of incomplete outcome data, 13 studies<sup>18 22 24-27 29 30 32 35 37 38 40</sup>  
10 reported low risk of bias and 4 studies<sup>21 28 36 39</sup> reported high risk. Almost all studies (16 studies) had  
11 low risk of bias for selective outcome reporting, while only one study<sup>37</sup> had high risk of bias. In the  
12 domain of power, 10 studies had unclear risk of bias, 6 reported low risk and 1 had high risk of bias.  
13  
14  
15  
16  
17  
18  
19  
20  
21

## 22 Pooled mean difference of depression score

### 23 *Home-based psychological intervention vs usual care*

24  
25  
26  
27 Nine studies were analyzed<sup>21 22 24 25 28-30 39 40</sup> comparing home-based psychological  
28 intervention with usual care (N = 739). Depression scores were assessed at the end of treatment,  
29 which ranged from 6 to 48 weeks. The mean differences and 95% CIs of depression scores for each  
30 study are presented in Table 2. SMD of home-based psychological intervention versus usual care  
31 was -0.57 (95% CI: -0.84, -0.31), suggesting that home-based psychological intervention can  
32 significantly decrease depression scores when compared with usual care.  
33  
34  
35  
36  
37  
38

39 Moderate heterogeneity was found between studies, with  $I^2$  of 63.5%. Sources of  
40 heterogeneity were explored but none of the factors decreased  $I^2$ . Subgroup analyses were performed  
41 according to the severity of depression (i.e. major depressive disorder (MDD), minor depression and  
42 mixed severity of depression). These showed that SMDs in patients with MDD, minor depression, and  
43 mixed severity of depression were -0.95 (95% CI: -1.35, -0.55;  $I^2 = 16.5\%$ ), -0.61 (95% CI: -1.28, 0.06;  
44  $I^2 = 82.1\%$ ), and -0.41, (95% CI: -0.62, -0.19;  $I^2 = 0\%$ ) respectively (see Supplementary Figure 1).  
45  
46  
47  
48  
49 These suggest that home-based psychological intervention reduces depression scores significantly in  
50 the groups of MDD and mixed severity of depression. In addition, the efficacy of this intervention in  
51 patients with MDD was better than the efficacy in patients with minor depression.  
52  
53  
54

### 55 *Home-based exercise intervention vs usual care*

1  
2  
3 Three studies<sup>26 30 35</sup> (N = 321) were pooled to compare the effect of home-based exercise  
4 intervention with usual care. The SMD was -1.03 (95% CI: -2.89, 0.82;  $I^2 = 97.9\%$ ) (Table 2 and  
5 Supplementary Figure 2A). The mean depression score in the home-based exercise intervention  
6 group was therefore 1.03 units lower than the mean depression score in the usual care group.  
7  
8 However, this effect did not reach statistical significance.  
9

#### 10 11 12 *Combined home-based psychological intervention with exercise intervention vs usual care*

13  
14  
15 Only two studies<sup>30 38</sup> (N = 169) had sufficient data for pooling the effect on the depression  
16 score of combined home-based psychological intervention with exercise intervention. Mean  
17 depression scores were measured at the ends of the treatments, namely at 12 weeks<sup>30</sup> and 24  
18 weeks<sup>38</sup>. Table 2 shows the mean depression scores and 95% CIs for each study. SMD was -0.78  
19 (95% CI: -1.09, -0.47;  $I^2 = 0.0\%$ ) (Supplementary Figure 2B). This indicates that patients receiving  
20 combined home-based psychological intervention and exercise intervention had significantly lower  
21 mean depression scores (by 0.78 units) than patients receiving usual care.  
22  
23  
24  
25  
26  
27

#### 28 29 **Pooled risk ratio of disease remission**

##### 30 31 *Home-based psychological intervention vs usual care*

32  
33  
34 Four studies (N = 459) comparing the effectiveness of home-based psychological intervention  
35 with usual care had remission rates as their outcome of interest. Remission from depression was  
36 defined as HAMD score  $\leq 7$  in one studies<sup>25</sup>, PHQ-9  $\leq 4$  in one study<sup>24</sup>, BDI  $< 4$  in one study<sup>39</sup> and  
37 CES-D  $< 16$  in one study<sup>40</sup> (Table 3). The pooled RR was 1.53 (95% CI: 1.19, 1.98) (Supplementary  
38 Figure 3), suggesting that patients receiving home-based psychological intervention were  
39 approximately 1.7 times more likely to have remission from depression than patients receiving usual  
40 care. The results among studies were homogeneous with  $I^2$  of 0%.  
41  
42  
43  
44  
45  
46

##### 47 48 *Home-based exercise intervention vs usual care*

49  
50 Two studies (N = 248) reported their outcome as disease remission and had sufficient data  
51 for pooling. Disease remission was defined as HAMD score  $\leq 7$ <sup>35</sup> or symptoms no longer meeting the  
52 criteria for major and minor depression according to DSM-IV criteria<sup>27</sup> (Table 3). The pooled RR was  
53 0.99 (95% CI: 0.79, 1.24;  $I^2 = 0.0\%$ ) (Supplementary Figure 4A), indicating that there was no  
54  
55  
56  
57  
58  
59  
60



1  
2  
3 significant difference between home-based exercise intervention and usual care in the likelihood of  
4 having remission from depression.  
5  
6

#### 7 *Combined home-based psychological intervention and exercise intervention vs usual care*

8  
9  
10 Three studies (N =279) were pooled to compare remission rates between combined  
11 psychological intervention and usual care. Disease remission was defined as HSCL-20 score < 0.5 for  
12 two studies<sup>37 38</sup> but in Banerjee's study<sup>18</sup> the outcome was not clearly defined (Table 3). Pooled RR  
13 was 3.47 (95% CI: 2.11, 5.70;  $I^2 = 19.7%$ ) suggesting that the combination of home-based  
14 psychological intervention and exercise intervention significantly increased the likelihood of remission  
15 from depression when compared with usual care (Supplementary Figure 4B).  
16  
17  
18  
19  
20

#### 21 **Network meta-analysis**

##### 22 *Disease remission rate*

23  
24  
25  
26  
27  
28  
29  
30  
31  
32  
33  
34  
35  
36  
37  
38  
39  
40  
41  
42  
43  
44  
45  
46  
47  
48  
49  
50  
51  
52  
53  
54  
55  
56  
57  
58  
59  
60

Nine studies (N = 987) were included in the network meta-analysis. Supplementary Figure 5 shows the network plot of home-based psychological intervention, home-based exercise intervention, combined home-based psychological intervention with exercise intervention, and usual care. Size of node and edge reflect the number of studies and patients respectively. From the plot, usual care was the common comparator and had the largest sample size of the four treatment regimes. Home-based psychological intervention versus usual care had the largest number of studies.

Pooled RRs for each treatment comparison are presented in Figure 2. Compared with usual care, only combined home-based psychological intervention with exercise intervention and home-based psychological intervention alone significantly increased the likelihood of disease remission, with pooled RRs of 3.12 (95% CI: 1.71, 5.70) and 1.50 (95% CI: 1.17, 1.93) respectively. In addition, the incidence of disease remission in home-based psychological intervention and combined home-based psychological intervention with exercise intervention groups was significantly higher than in the home-based exercise intervention group, having pooled RRs of 1.49 (95% CI: 1.07, 2.10) and 3.10 (95% CI: 1.63, 5.90), respectively. When compared with home-based psychological intervention alone, combined home-based psychological intervention with exercise intervention also significantly improved the rate of disease remission (pooled RR = 2.08; 95% CI: 1.08, 3.99).

1  
2  
3 Treatment ranking was assessed by estimating the probability of each treatment being the  
4 best. This yielded probabilities of 99.5%, 0.5%, and 0% for combined home-based psychological  
5 intervention with exercise intervention, home-based psychological intervention alone, and home-  
6 based exercise intervention respectively. Combined home-based psychological intervention with  
7 exercise intervention therefore emerged as the best intervention for achieving remission from  
8 depression.  
9

10  
11  
12  
13  
14 Applying inconsistency assumptions to the treatments, inconsistency factors were calculated  
15 as 0.020 (Z=0.183, P-value=0.912) for home-based psychological intervention vs usual care, -0.018  
16 (Z=0.110, P-value=0.913) for home-based exercise intervention vs usual care, and 0.106 (Z=0.107,  
17 P-value=0.915) for combined home-based psychological intervention with exercise intervention  
18 versus usual care. These figures find no significant difference between the direct and indirect  
19 comparison of estimated treatment effects.  
20  
21  
22  
23  
24

### 25 26 **Efficacy of complementary or alternative medicine**

27  
28  
29 Results from a study comparing the efficacy of home-based deep-breathing exercises with  
30 usual care showed that patients receiving this intervention had significantly lower depression scores  
31 than patients receiving usual care, with a mean difference of -1.34 (95% CI: -1.17, -0.17). Another  
32 study compared the efficacy of home-based spiritual therapy with usual care. Findings from this study  
33 suggested that home-based spiritual therapy could significantly decrease depression scores when  
34 compared with usual care, with a mean difference of -1.11 (95% CI: -1.57, -0.65). In addition, this  
35 study found that patients receiving home-based spiritual therapy were more likely to have disease  
36 remission than patients receiving usual care. The risk ratio of disease remission (defined as HAMD  
37 score  $\leq$  7) from this study was 13.85 (95% CI: 1.88, 101.74)  
38  
39  
40  
41  
42  
43  
44  
45

### 46 **Publication bias**

47  
48  
49 Egger tests and Funnel plots did not suggest any publication bias for pooling the effect of  
50 home-based psychological intervention (coefficient = -0.05, P-value = 0.882) and home-based  
51 exercise intervention (coefficient = 6.94, P-value = 0.818) (see Supplementary Figure 6A and 6B). For  
52 combined home-based psychological intervention and exercise intervention, the Egger test did not  
53 suggest publication bias but a funnel plot showed asymmetry (Supplementary Figure 7A). This  
54  
55  
56  
57  
58  
59  
60

1  
2  
3 inconsistency might be due to Egger's test having insufficient power to detect a difference when only  
4  
5 3 studies were considered in the analysis.  
6

7  
8 The cause of this asymmetry was further explored by performing a contour enhanced funnel  
9  
10 plot which showed that most of the studies fell inside the significant area. The asymmetrical plot may,  
11  
12 therefore, result from a small study effect rather than heterogeneity between studies (see  
13  
14 Supplementary Figure 7B).

## 15 **DISCUSSION**

16  
17  
18 Our study found that a combination of home-based psychological intervention with exercise  
19  
20 intervention and home-based psychological intervention alone both significantly decreased  
21  
22 depressive symptoms and increased the likelihood of disease remission when compared with usual  
23  
24 care. The SMD of home-based psychological intervention vs usual care was -0.57, which reflects the  
25  
26 moderate magnitude of treatment effect, while SMD of combined home-based psychological  
27  
28 intervention with exercise intervention vs usual care was -0.78 revealing the high magnitude<sup>44</sup>.  
29  
30 Treatment effect of these two interventions were comparable with selective serotonin reuptake  
31  
32 inhibitor, which had SMD of 0.05, for treatment of depression<sup>45</sup>. However, we could not demonstrate  
33  
34 any benefit of home-based exercise intervention alone when compared with usual care. In addition,  
35  
36 combined home-based psychological intervention with exercise intervention had the highest  
37  
38 probability of remission from depression compared both with home-based psychological intervention  
39  
40 and home-based exercise intervention.

41  
42 The effectiveness of clinic-based psychological intervention for treating depression has been  
43  
44 confirmed by previous studies<sup>40 46</sup>. The results of our study also support the efficacy of this  
45  
46 intervention when performed in the patient's home. In our review, the majority of participants in the  
47  
48 included studies were depressed patients with comorbidities such as epilepsy<sup>37</sup> or heart disease<sup>22 30</sup>  
49  
50 <sup>36</sup>, or were elderly patients with disabilities<sup>18</sup> or cognitive impairment<sup>25</sup>. These groups have a high  
51  
52 prevalence of depression and should therefore be expected to receive a significant share of mental  
53  
54 health provision. However, their ability to access conventional clinic-based mental health services is  
55  
56 restricted by mobility problems and low motivation to seek help. With its ability to overcome these  
57  
58 barriers, home-based psychological intervention is particularly appropriate in these situations.  
59  
60

1  
2  
3 In addition to demonstrating the efficacy of home-based psychological intervention overall,  
4 subgroup analysis within our study raises an interesting point. Home-based psychological intervention  
5 decreased symptoms of depression for all types of depression but the effect was statistically  
6 significant only in patients with MDD and mixed severity depression, not for those with minor  
7 depression. This inconsistent finding may result from the so called “ceiling” effect. The level of  
8 depressive symptoms in minor depression is relatively low at baseline when compared with major  
9 depression, which could limit the potential for symptom improvement<sup>47</sup>. This ceiling effect was also  
10 found in the studies reviewing the use of antidepressant medication for minor depressive symptoms.  
11  
12

13  
14  
15  
16  
17  
18 The rationale for home-based exercise intervention rests on the theory that increasing  
19 physical activity can improve depressive symptoms through psychological and physiological routes.  
20 Exercise serves as a distraction from worries and depressive thoughts, increases self-efficacy, and  
21 gives a sense of mastery. Possible physiological mechanisms include an increase in body  
22 temperature leading to a feeling of relaxation and reduced muscle tension, an increase in levels of  
23 endorphins related to positive mood and a sense of well-being, increases in the availability of the  
24 central neurotransmitters dopamine, norepinephrine and serotonin, and changes in neurobiological  
25 response<sup>48-50</sup>. Although previous literature has demonstrated the benefit of supervised exercise in  
26 treating depression<sup>51 52</sup>, our study found no benefit from home-based exercise intervention in  
27 ameliorating depressive symptoms. The differences in these findings may be explained by poorer  
28 treatment compliance in the home-based exercise intervention group, as to achieve significant benefit  
29 patients have to practice the exercise programme at a prescribed intensity and frequency. Lack of  
30 motivation and inattention are common symptoms in depression and may account for unsupervised  
31 patients failing to achieve the prescribed levels of activity when compared with those given  
32 encouragement through supervision. This assumption corresponds with findings from the home-  
33 based exercise studies<sup>26 27</sup> that the physical health of patients in this group (i.e. cardio-respiratory  
34 capacity, BMI, and lower limb strength), the surrogate endpoints of exercise intervention, did not  
35 change significantly from baseline.  
36  
37  
38  
39  
40  
41  
42  
43  
44  
45  
46  
47  
48  
49  
50

51  
52 Although our study did not find any advantages of home-based exercise intervention over  
53 usual care, when combined with psychological intervention the combined approach had a significantly  
54 greater benefit than either of these interventions alone. The combination may have a synergistic  
55  
56  
57  
58  
59  
60

1  
2  
3 effect, with psychological intervention improving motivation to initiate and maintain an exercise  
4 programme while the latter in turn enhances the benefits of psychological intervention<sup>53</sup>.  
5  
6

7         Reviewing complimentary or alternative medicine approaches, results from Chung et al<sup>36</sup> and  
8 Rickhi et al<sup>32</sup> showed that home-based deep-breathing training and spiritual teaching programmes  
9 could significantly reduce depressive symptoms when compared with usual care. However, these two  
10 studies had small sample sizes and included specific populations, namely coronary heart disease  
11 patients for Chung's study and middle-aged females for Rickhi's study. Their findings may not,  
12 therefore, be generalizable to other populations.  
13  
14  
15  
16  
17  
18

### 19 **Strengths and limitations**

20  
21         Our study has several strengths. Given the potential of home-based interventions to treat  
22 depression and the increasing use of these interventions, our analysis provides the first  
23 comprehensive review of the efficacy of home-based interventions in treating depression. A  
24 comprehensive search was undertaken to identify as many relevant studies as possible and two  
25 reviewers selected the studies independently with a high level of agreement. Selection bias was,  
26 therefore less likely. In addition, we performed a network meta-analysis to compare the efficacy of all  
27 available home-based interventions in order to identify the best treatment regime.  
28  
29  
30  
31  
32  
33  
34

35         We are aware that our study may have some limitations. Firstly, the quality of included studies  
36 in the area of allocation concealment was not optimal. The results from our study might, therefore, be  
37 affected by selection bias and should be interpreted with caution. Secondly, participants in our  
38 included studies were aware both of their own interventions and their subjective outcomes, including  
39 the self-reported depression scores. However, in most of the included studies this bias from non-  
40 blinded intervention was minimized by blinding the outcome assessors. Thirdly, although all studies  
41 used usual care as a treatment comparator, descriptions of usual care differed among the included  
42 studies (see Supplementary Table 2). For instance, usual care in Blumenthal's study consisted of  
43 each participant in the control group being prescribed antidepressant medication while home-based  
44 exercise participants received none. This may be responsible for a high remission rate in the control  
45 group, resulting in an underestimated treatment effect for home-based exercise.  
46  
47  
48  
49  
50  
51  
52  
53  
54  
55  
56  
57  
58  
59  
60

1  
2  
3  
4  
5  
6  
7  
8  
9  
10  
11  
12  
13  
14  
15  
16  
17  
18  
19  
20  
21  
22  
23  
24  
25  
26  
27  
28  
29  
30  
31  
32  
33  
34  
35  
36  
37  
38  
39  
40  
41  
42  
43  
44  
45  
46  
47  
48  
49  
50  
51  
52  
53  
54  
55  
56  
57  
58  
59  
60

Network meta-analysis allows indirect comparison of the efficacy of all possible interventions, given the presence of some common comparators. However, this technique requires two important assumptions, namely transitivity and consistency<sup>54</sup>. Transitivity requires that the characteristics of patients and studies subjected to direct and indirect comparisons should be similar. For instance, the characteristics of patients in a study comparing home-based psychological intervention with usual care and of patients in a study of home-based exercise versus usual care should be similar in order to perform an indirect comparison of home-based psychological intervention versus home-based exercise. This assumption cannot be directly assessed or tested. However, consistency testing is a manifestation of transitivity. We therefore made a consistency assumption by comparing intervention effects between direct and indirect estimates. The number of included studies may play a role in this assessment, i.e. a false negative result might be present when direct and indirect estimates are not statistically different. For our study, inconsistency factors ranged from -0.018 to 0.106, at which levels a false negative result is unlikely.

We were unable to check consistency assumption in three of the indirect comparisons due to a lack of direct comparisons. For each of these studies, we therefore explored patient characteristics (mean age and types of depression), the duration of the intervention, the percentage of antidepressant use in the intervention and control groups, and the description of usual care (see Supplementary Table 2) and found variations between studies and comparisons. For example, the definitions of usual care in the studies of combined home-based psychological intervention with exercise were not clearly defined, while the common definition of usual care in the studies into home-based psychological intervention was the standard treatment of depression by psychiatrists. This heterogeneity within and between interventions across included studies may impact both on the results and on the transitivity and consistency assumptions of our network met-analysis. Results from indirect comparison, e.g. the efficacy of home-based psychological intervention and combined home-based psychological intervention with exercise versus home-based exercise alone should therefore be interpreted with caution. Ideally, confirmation should be sought by undertaking further randomized-controlled trials directly comparing these two interventions with home-based exercise.

#### **Clinical implication and further study**

1  
2  
3 Depression is a common disorder, particularly among the elderly and in those with a chronic  
4 disease. Many of these patients have difficulty accessing mental health services due to physical  
5 disabilities and transportation problems. Home-based interventions to treat depression have the  
6 potential to overcome these barriers and have been shown by our study to be effective. This  
7 information should prove helpful when designing clinical guidelines. However, there are obvious  
8 logistical differences between home-based treatments for depression and conventional clinic-based  
9 care. Our study has not investigated these aspects of treatment design and, in particular, has not  
10 considered manpower implications or transport costs. An economic evaluation study is needed before  
11 general implementation of a home-based care model can be recommended unequivocally.  
12  
13  
14  
15  
16  
17  
18  
19

20 Although a randomized-controlled trial is considered to be the gold standard for therapeutic  
21 research, in a real world setting this design may not be ideal for examining patient preferences and  
22 adherence to treatment. In this review, most of the studies (n=10) did not report the degree of  
23 adherence with the prescribed intervention. Seven studies demonstrated the effect of adherence on  
24 outcomes but used different definitions to assess adherence. To maximize treatment efficacy, further  
25 studies should determine the effects of patient preferences and adherence to treatment for different  
26 approaches and modes of delivery as well as examine the factors that influence preferences and  
27 adherence.  
28  
29  
30  
31  
32  
33  
34

### 35 CONCLUSION

36  
37  
38 Our study has confirmed the efficacy both of home-based psychological intervention and  
39 combined home-based psychological intervention with exercise intervention in decreasing symptoms  
40 of depression and improving rates of remission. In addition, the combination of home-based  
41 psychological intervention and exercise intervention has the highest probability of being the best  
42 treatment out of all available home-based interventions. This approach should, therefore, be  
43 considered when formulating clinical guidelines for treating depression.  
44  
45  
46  
47  
48  
49

50 **Contributors:** KS, PI, and TA were involved in the conception and design of the review. KS and TA  
51 developed the search strategy, performed study selection, extracted data from included studies and  
52 analyzed the data. KS, ML, PI, AD, AT and TA were involved in the interpretation and discussion of  
53 results. KS and TA drafted the manuscript. PI, AD, AT and TA revised it critically for important  
54 intellectual content. All authors approved the final version of the article. All authors had access to all  
55  
56  
57  
58  
59  
60

1  
2  
3 of the data in the study and can take responsibility for the integrity of the data and the accuracy of the  
4 data analysis. TA is guarantor.  
5  
6

7 **Funding:** This research did not receive a specific grant from any funding agency in the public,  
8 commercial, or not-for-profit sectors.  
9

10  
11 **Competing interests:** All authors have completed the ICMJE uniform disclosure form at  
12 www.icmje.org/coi\_disclosure.pdf and declare: no support from any organization for the submitted  
13 work; no financial relationships with any organizations that might have an interest in the submitted  
14 work in the previous three years; no other relationships or activities that could appear to have  
15 influenced the submitted work.  
16  
17  
18  
19

20  
21 **Ethical approval:** Not required.  
22  
23

24 **Data sharing:** No additional data available.  
25  
26  
27  
28  
29  
30  
31  
32  
33  
34  
35  
36  
37  
38  
39  
40  
41  
42  
43  
44  
45  
46  
47  
48  
49  
50  
51  
52  
53  
54  
55  
56  
57  
58  
59  
60



**Reference**

1. Ferrari AJ, Charlson FJ, Norman RE, et al. Burden of Depressive Disorders by Country, Sex, Age, and Year: Findings from the Global Burden of Disease Study 2010. *PLoS Med* 2013;**10**(11):e1001547.
2. Reddy MS. Depression: The Disorder and the Burden. *Indian J Psychol Med* 2010;**32**(1):1-2.
3. Penninx BW, Guralnik JM, Ferrucci L, et al. Depressive symptoms and physical decline in community-dwelling older persons. *JAMA* 1998;**279**(21):1720-6.
4. Rovner BW, German PS, Brant LJ, et al. Depression and mortality in nursing homes. *JAMA* 1991;**265**(8):993-6.
5. Unutzer J, Katon W, Callahan CM, et al. Collaborative care management of late-life depression in the primary care setting: a randomized controlled trial. *JAMA* 2002;**288**(22):2836-45.
6. Ciechanowski PS, Katon WJ, Russo JE. Depression and diabetes: impact of depressive symptoms on adherence, function, and costs. *Arch Intern Med* 2000;**160**(21):3278-85.
7. Frasure-Smith N, Lesperance F, Talajic M. Depression following myocardial infarction. Impact on 6-month survival. *JAMA* 1993;**270**(15):1819-25.
8. Katon W, Ciechanowski P. Impact of major depression on chronic medical illness. *J Psychosom Res* 2002;**53**(4):859-63.
9. Hunot VM, Horne R, Leese MN, et al. A Cohort Study of Adherence to Antidepressants in Primary Care: The Influence of Antidepressant Concerns and Treatment Preferences. *Primary Care Companion to The Journal of Clinical Psychiatry* 2007;**9**(2):91-99.
10. Churchill R, Khaira M, Gretton V, et al. Treating depression in general practice: factors affecting patients' treatment preferences. *The British journal of general practice : the journal of the Royal College of General Practitioners* 2000;**50**(460):905-6.
11. Riedel-Heller SG, Matschinger H, Angermeyer MC. Mental disorders--who and what might help? Help-seeking and treatment preferences of the lay public. *Social psychiatry and psychiatric epidemiology* 2005;**40**(2):167-74.
12. Jaycox LH, Miranda J, Meredith LS, et al. Impact of a primary care quality improvement intervention on use of psychotherapy for depression. *Mental health services research* 2003;**5**(2):109-20.

- 1  
2  
3 13. Mohr DC, Hart SL, Howard I, et al. Barriers to psychotherapy among depressed and  
4  
5 nondepressed primary care patients. *Annals of behavioral medicine : a publication of the*  
6  
7 *Society of Behavioral Medicine* 2006;**32**(3):254-8.
- 8  
9 14. Geerlings SW, Beekman AT, Deeg DJ, et al. Physical health and the onset and persistence of  
10  
11 depression in older adults: an eight-wave prospective community-based study. *Psychol Med*  
12  
13 2000;**30**(2):369-80.
- 14  
15 15. Schoevers RA, Beekman AT, Deeg DJ, et al. Risk factors for depression in later life; results of a  
16  
17 prospective community based study (AMSTEL). *J Affect Disord* 2000;**59**(2):127-37.
- 18  
19 16. Krishnan KR, George LK, Pieper CF, et al. Depression and social support in elderly patients with  
20  
21 cardiac disease. *Am Heart J* 1998;**136**(3):491-5.
- 22  
23 17. Prince MJ, Harwood RH, Thomas A, et al. A prospective population-based cohort study of the  
24  
25 effects of disablement and social milieu on the onset and maintenance of late-life depression.  
26  
27 The Gospel Oak Project VII. *Psychol Med* 1998;**28**(2):337-50.
- 28  
29 18. Banerjee S, Shamash K, Macdonald AJ, et al. Randomised controlled trial of effect of intervention  
30  
31 by psychogeriatric team on depression in frail elderly people at home. *BMJ (Clinical research*  
32  
33 *ed)* 1996;**313**(7064):1058-61.
- 34  
35 19. Bruce ML, Hoff RA. Social and physical health risk factors for first-onset major depressive disorder  
36  
37 in a community sample. *Soc Psychiatry Psychiatr Epidemiol* 1994;**29**(4):165-71.
- 38  
39 20. Zozula R, Rosen RC, Jahn EG, et al. Recognition of sleep disorders in a community-based setting  
40  
41 following an educational intervention. *Sleep Med* 2005;**6**(1):55-61.
- 42  
43 21. Choi NG, Hegel MT, Marti CN, et al. Telehealth problem-solving therapy for depressed low-  
44  
45 income homebound older adults. *American Journal of Geriatric Psychiatry* 2014;**22**(3):263-71.
- 46  
47 22. Gellis ZD, Bruce ML. Problem-solving therapy for subthreshold depression in home healthcare  
48  
49 patients with cardiovascular disease. *American Journal of Geriatric Psychiatry*  
50  
51 2010;**18**(6):464-74.
- 52  
53 23. Gellis ZD, McGinty J, Tierney L, et al. Randomized controlled trial of problem-solving therapy for  
54  
55 minor depression in home care. *Research on Social Work Practice* 2008;**18**(6):596-606.
- 56  
57 24. Gitlin LN, Harris LF, McCoy MC, et al. A home-based intervention to reduce depressive symptoms  
58  
59 and improve quality of life in older African Americans: A randomized trial. *Annals of Internal*  
60  
*Medicine* 2013;**159**(4):243-52.

- 1  
2  
3 25. Kiosses DN, Ravdin LD, Gross JJ, et al. Problem adaptation therapy for older adults with major  
4 depression and cognitive impairment: A randomized clinical trial. *JAMA Psychiatry*  
5 2015;**72**(1):22-30.  
6  
7
- 8 26. Kerse N, Hayman KJ, Moyes SA, et al. Home-based activity program for older people with  
9 depressive symptoms: DeLLITE - A randomized controlled trial. *Annals of Family Medicine*  
10 2010;**8**(3):214-23.  
11  
12
- 13 27. Pfaff JJ, Alfonso H, Newton RU, et al. ACTIVEDEP: A randomised, controlled trial of a home-  
14 based exercise intervention to alleviate depression in middle-aged and older adults. *British*  
15 *Journal of Sports Medicine* 2014;**48**(3):226-32.  
16  
17
- 18 28. Klug G, Hermann G, Fuchs-Nieder B, et al. Effectiveness of home treatment for elderly people  
19 with depression: Randomised controlled trial. *British Journal of Psychiatry* 2010;**197**(6):463-  
20 67.  
21  
22
- 23 29. Gellis ZD, McGinty J, Horowitz A, et al. Problem-solving therapy for late-life depression in home  
24 care: A randomized field trial. *American Journal of Geriatric Psychiatry* 2007;**15**(11):968-78.  
25  
26
- 27 30. Gary RA, Dunbar SB, Higgins MK, et al. Combined exercise and cognitive behavioral therapy  
28 improves outcomes in patients with heart failure. *Journal of psychosomatic research*  
29 2010;**69**(2):119-31.  
30  
31
- 32 31. Chaytor N, Ciechanowski P, Miller JW, et al. Long-term outcomes from the PEARLS randomized  
33 trial for the treatment of depression in patients with epilepsy. *Epilepsy and Behavior*  
34 2011;**20**(3):545-49.  
35  
36
- 37 32. Rickhi B, Moritz S, Reesal R, et al. A spirituality teaching program for depression: a randomized  
38 controlled trial. *International journal of psychiatry in medicine* 2011;**42**(3):315-29.  
39  
40
- 41 33. Renton T, Tang H, Ennis N, et al. Web-based intervention programs for depression: a scoping  
42 review and evaluation. *Journal of medical Internet research* 2014;**16**(9):e209.  
43  
44
- 45 34. Badri R, Sabine M, Robin R, et al. A Spirituality Teaching Program for Depression: A Randomized  
46 Controlled Trial. *International Journal of Psychiatry in Medicine* 2011;**42**(3):315-29.  
47  
48
- 49 35. Blumenthal JA, Babyak MA, Doraiswamy PM, et al. Exercise and pharmacotherapy in the  
50 treatment of major depressive disorder. *Psychosomatic medicine* 2007;**69**(7):587-96.  
51  
52  
53  
54  
55  
56  
57  
58  
59  
60

- 1  
2  
3 36. Chung L, Tsai P, Liu B, et al. Home-based deep breathing for depression in patients with coronary  
4 heart disease: A randomised controlled trial. *International Journal of Nursing Studies*  
5 2010;**47**(11):1346-53.  
6  
7  
8 37. Ciechanowski P, Chaytor N, Miller J, et al. PEARLS depression treatment for individuals with  
9 epilepsy: A randomized controlled trial. *Epilepsy and Behavior* 2010;**19**(3):225-31.  
10  
11 38. Ciechanowski P, Wagner E, Schmaling K, et al. Community-Integrated Home-Based Depression  
12 Treatment in Older Adults: A Randomized Controlled Trial. *Journal of the American Medical*  
13 *Association* 2004;**291**(13):1569-77.  
14  
15 39. Naylor EV, Antonuccio DO, Litt M, et al. Bibliotherapy as a treatment for depression in primary  
16 care. *Journal of clinical psychology in medical settings* 2010;**17**(3):258-71.  
17  
18 40. Joling KJ, van Hout HP, van't Veer-Tazelaar PJ, et al. How effective is bibliotherapy for very old  
19 adults with subthreshold depression? A randomized controlled trial. *The American journal of*  
20 *geriatric psychiatry : official journal of the American Association for Geriatric Psychiatry*  
21 2011;**19**(3):256-65.  
22  
23 41. Higgins JPT, Altman DG, Gøtzsche PC, et al. The Cochrane Collaboration's tool for assessing risk  
24 of bias in randomised trials. *BMJ (Clinical research ed)* 2011;**343**.  
25  
26 42. Higgins JPT, Thompson SG, Deeks JJ, et al. Measuring inconsistency in meta-analyses. *BMJ :*  
27 *British Medical Journal* 2003;**327**(7414):557-60.  
28  
29 43. Caldwell DM, Ades AE, Higgins JP. Simultaneous comparison of multiple treatments: combining  
30 direct and indirect evidence. *BMJ (Clinical research ed)* 2005;**331**(7521):897-900.  
31  
32 44. Cohen J. *Statistical Power Analysis for the Behavioral Sciences*. Second ed. Hillsdale: Lawrence  
33 Erlbaum, 1988.  
34  
35 45. Faraone SV. Interpreting Estimates of Treatment Effects: Implications for Managed Care.  
36 *Pharmacy and Therapeutics* 2008;**33**(12):700-11.  
37  
38 46. Cuijpers P, van Straten A, van Schaik A, et al. Psychological treatment of depression in primary  
39 care: a meta-analysis. *British Journal of General Practice* 2009;**59**(559):e51-e60.  
40  
41 47. Krishna M, Lepping P, Jones S, et al. Systematic review and meta-analysis of group cognitive  
42 behavioural psychotherapy treatment for sub-clinical depression. *Asian journal of psychiatry*  
43 2015;**16**:7-16.  
44  
45  
46  
47  
48  
49  
50  
51  
52  
53  
54  
55  
56  
57  
58  
59  
60

- 1  
2  
3 48. Wegner M, Helmich I, Machado S, et al. Effects of exercise on anxiety and depression disorders:  
4 review of meta- analyses and neurobiological mechanisms. *CNS & neurological disorders*  
5 drug targets 2014;**13**(6):1002-14.  
6  
7  
8 49. Matta Mello Portugal E, Cevada T, Sobral Monteiro-Junior R, et al. Neuroscience of exercise:  
9 from neurobiology mechanisms to mental health. *Neuropsychobiology* 2013;**68**(1):1-14.  
10  
11 50. Schuch FB, Vasconcelos-Moreno MP, Borowsky C, et al. Exercise and severe major depression:  
12 effect on symptom severity and quality of life at discharge in an inpatient cohort. *Journal of*  
13 *psychiatric research* 2015;**61**:25-32.  
14  
15  
16 51. Krogh J, Nordentoft M, Sterne JA, et al. The effect of exercise in clinically depressed adults:  
17 systematic review and meta-analysis of randomized controlled trials. *The Journal of clinical*  
18 *psychiatry* 2011;**72**(4):529-38.  
19  
20  
21 52. Danielsson L, Noras AM, Waern M, et al. Exercise in the treatment of major depression: a  
22 systematic review grading the quality of evidence. *Physiotherapy theory and practice*  
23 2013;**29**(8):573-85.  
24  
25  
26 53. Mura G, Moro MF, Patten SB, et al. Exercise as an add-on strategy for the treatment of major  
27 depressive disorder: a systematic review. *CNS spectrums* 2014;**19**(6):496-508.  
28  
29  
30 54. Efthimiou O, Debray TP, van Valkenhoef G, et al. GetReal in network meta-analysis: a review of  
31 the methodology. *Research synthesis methods* 2016;**7**(3):236-63.  
32  
33  
34  
35  
36  
37  
38  
39  
40  
41  
42  
43  
44  
45  
46  
47  
48  
49  
50  
51  
52  
53  
54  
55  
56  
57  
58  
59  
60

Table 1. Characteristics of included studies

| Author                | Setting     | Type of depression        | Participants |            |            |                  |             |                                  |                          | Study's intervention |                  |                                        |
|-----------------------|-------------|---------------------------|--------------|------------|------------|------------------|-------------|----------------------------------|--------------------------|----------------------|------------------|----------------------------------------|
|                       |             |                           | N            | Age (mean) | Female (%) | Living alone (%) | Married (%) | Baseline depression score (mean) | Anti-depressants use (%) | Type of intervention | Duration (weeks) | Comparison                             |
| Kiosses <sup>25</sup> | U.S.        | Major depressive disorder | 74           | 80.91      | 74.3       | NA               | NA          | 21.25 <sup>a</sup>               | 63.51                    | PST-HC               | 12 weeks         | Usual care with home visit             |
| Choi <sup>21</sup>    | U.S.        | Mixed depression          | 121          | 65.21      | 77.7       | 63.6             | NA          | 24.55 <sup>b</sup>               | NA                       | PST-HC               | 12 weeks         | Usual care with telephone support call |
| Gitlin <sup>24</sup>  | New Zealand | Mixed depression          | 208          | 69.57      | 78.4       | 56.8             | 12.0        | 13.01 <sup>c</sup>               | 19.3                     | PST-HC               | 16 weeks         | Usual care                             |
| Klug <sup>28</sup>    | Australia   | Major depressive disorder | 60           | 74.9       | 90.0       | 78.3             | NA          | 8.91 <sup>e</sup>                | 95                       | PST-HC               | 52 weeks         | Usual care                             |
| Gellis <sup>22</sup>  | U.S.        | Minor depression          | 36           | 75.9       | 91.6       | 88.9             | 8.3         | 18.05 <sup>b</sup>               | 0                        | PST-HC               | 6 weeks          | Usual care                             |
| Gellis <sup>29</sup>  | U.S.        | Minor depression          | 62           | 77.67      | 87.5       | 80.0             | 20.0        | 20.52 <sup>a</sup>               | NA                       | PST-HC               | 6 weeks          | Usual care with home visit             |

1  
2  
3  
4

| Author                     | Setting     | Type of depression        | Participants |            |            |                  |             |                                  |                          | Study's intervention                                                        |                  |                            |
|----------------------------|-------------|---------------------------|--------------|------------|------------|------------------|-------------|----------------------------------|--------------------------|-----------------------------------------------------------------------------|------------------|----------------------------|
|                            |             |                           | N            | Age (mean) | Female (%) | Living alone (%) | Married (%) | Baseline depression score (mean) | Anti-depressants use (%) | Type of intervention                                                        | Duration (weeks) | Comparison                 |
| Naylor <sup>39</sup>       | U.S.        | Mixed depression          | 38           | 51.45      | 84.2       | NA               | NA          | 7.9 <sup>f</sup>                 | NA                       | Home-based CBT                                                              | 6 weeks          | Usual care                 |
| Joling <sup>40</sup>       | Netherlands | Minor depression          | 170          | 81.45      | 73.5       | NA               | 29.4        | 21.6                             | NA                       | Home-based CBT                                                              | 12 weeks         | Usual care                 |
| Pfaff <sup>27</sup>        | U.S.        | Mixed depression          | 200          | 60.97      | 63.0       | 21.6             | 53.0        | NA                               | 54.5                     | Home-based exercise                                                         | 12 weeks         | Usual care                 |
| Kerse <sup>26</sup>        | Austria     | Mixed depression          | 193          | 81.1       | 58.5       | 51.8             | NA          | 3.7 <sup>e</sup>                 | 26.4                     | Home-based exercise                                                         | 24 weeks         | Usual care with home visit |
| Blumenthal <sup>35</sup>   | U.S.        | Major depressive disorder | 102          | 52.52      | 74.5       | NA               | NA          | 16.52 <sup>b</sup>               | 0                        | Home-based exercise                                                         | 16 weeks         | Usual care                 |
| Ciechanowski <sup>37</sup> | U.S.        | Mixed depression          | 80           | 43.9       | 52.5       | NA               | 68.8        | 2.00 <sup>d</sup>                | 40%                      | Combined PST-HC with home-based exercise                                    | 19 weeks         | Usual care                 |
| Ciechanowski <sup>38</sup> | U.S.        | Minor depression          | 138          | 73         | 79         | 72.0             | 11.0        | 1.3 <sup>d</sup>                 | 51                       | Combined PST-HC with home-based exercise                                    | 19 weeks         | Usual care                 |
| Banerjee <sup>18</sup>     | Taiwan      | Mixed depression          | 69           | 80.71      | 82.9       | 78.3             | 15.9        | 26.25 <sup>a</sup>               | 11.39                    | Combined family therapy, bereavement counselling, social interventions with | 24 weeks         | Usual care                 |

40  
41  
42  
43  
44  
45  
46  
47  
48  
49

1  
2  
3  
4  
5  
6  
7  
8  
9  
10  
11  
12  
13  
14  
15  
16  
17  
18  
19  
20  
21  
22  
23  
24  
25  
26  
27  
28  
29  
30  
31  
32  
33  
34  
35  
36  
37  
38  
39  
40  
41  
42  
43  
44  
45  
46  
47  
48  
49

| Author               | Setting | Type of depression        | Participants |            |            |                  |             |                                  | Study's intervention     |                                                                                       |                  |                                        |
|----------------------|---------|---------------------------|--------------|------------|------------|------------------|-------------|----------------------------------|--------------------------|---------------------------------------------------------------------------------------|------------------|----------------------------------------|
|                      |         |                           | N            | Age (mean) | Female (%) | Living alone (%) | Married (%) | Baseline depression score (mean) | Anti-depressants use (%) | Type of intervention                                                                  | Duration (weeks) | Comparison                             |
|                      |         |                           |              |            |            |                  |             |                                  |                          | home-based exercise                                                                   |                  |                                        |
| Gary <sup>30</sup>   | U.S.    | Mixed depression          | 74           | 65.8       | 57.1       | NA               | 39.2        | 20.7 <sup>f</sup>                | 29.7                     | Home-based CBT, home-based exercise, combined home-based CBT with home-based exercise | 12 weeks         | Usual care                             |
| Rickhi <sup>32</sup> | U.K.    | Major depressive disorder | 84           | 44.05      | 77.4       | NA               | 58.3        | 20.35 <sup>b</sup>               | 0                        | Spiritual teaching program                                                            | 8 weeks          | Usual care                             |
| Chung <sup>36</sup>  | U.S.    | Mixed depression          | 62           | 71.50      | 30.6       | NA               | NA          | 7.53 <sup>c</sup>                | 1.61                     | Home-based deep breathing exercise                                                    | 4 weeks          | Usual care with telephone support call |

<sup>a</sup>MADRS; <sup>b</sup>HAMD; <sup>c</sup>PHQ-9; <sup>d</sup>HSCL-20; <sup>e</sup>GDS; <sup>f</sup>BDI

PST-HC, problem solving therapy-home care; CBT, cognitive behavioural therapy



**Table 2.** Mean difference of depression score after treatment between intervention and control groups

| Author                                                              | Year | Follow up time | Treatment Adherence (%) | Intervention |       |      | Control |       |      | Mean difference (95% CI)    |
|---------------------------------------------------------------------|------|----------------|-------------------------|--------------|-------|------|---------|-------|------|-----------------------------|
|                                                                     |      |                |                         | N            | Mean  | SD   | N       | Mean  | SD   |                             |
| <i>Home-based Psychological intervention</i>                        |      |                |                         |              |       |      |         |       |      |                             |
| Kiosses <sup>25</sup>                                               | 2015 | 12 weeks       | Not reported            | 37           | 10.6  | 6.08 | 37      | 15.6  | 6.81 | -0.77 (0.30, -1.25)         |
| Choi <sup>21</sup>                                                  | 2014 | 12 weeks       | Not reported            | 35           | 14.44 | 7.04 | 31      | 19.16 | 7.02 | -0.67 (-1.17, -0.17)        |
| Gitlin <sup>24</sup>                                                | 2013 | 16 weeks       | 93.3%                   | 106          | 6.4   | 6.18 | 102     | 8.9   | 6.06 | -0.41 (-0.13, -0.68)        |
| Joling <sup>40</sup>                                                | 2011 | 12 weeks       | 41%                     | 86           | 16.60 | 6.41 | 84      | 17.27 | 6.53 | -0.10 (-0.40, 0.20)         |
| Gary <sup>30</sup>                                                  | 2010 | 12weeks        | 72%                     | 17           | 8.2   | 6.3  | 15      | 9.3   | 4.9  | 0.19 (0.50, -0.89)          |
| Gellis <sup>22</sup>                                                | 2010 | 6 weeks        | Not reported            | 18           | 11.4  | 8.3  | 18      | 17.3  | 8.1  | 0.72 (-0.04, -1.39)         |
| Klug <sup>28</sup>                                                  | 2010 | 48 weeks       | Not reported            | 29           | 6.11  | 3.00 | 29      | 10.43 | 4.2  | -1.18 (-0.62, -1.74)        |
| Naylor <sup>39</sup>                                                | 2010 | 6 weeks        | 50.9%                   | 15           | 4.40  | 5.30 | 18      | 4.90  | 5.30 | -0.09 (-0.78, 0.59)         |
| Gellis <sup>29</sup>                                                | 2007 | 6 weeks        | Not reported            | 30           | 8.11  | 4.3  | 32      | 13.64 | 5.6  | 1.10 (-0.57, -1.64)         |
| <i>Home-based exercise</i>                                          |      |                |                         |              |       |      |         |       |      |                             |
| <b>SMD (95% CI)</b>                                                 |      |                |                         |              |       |      |         |       |      | <b>-0.57 (-0.84, -0.31)</b> |
| Kerse <sup>26</sup>                                                 | 2010 | 24 weeks       | 33%                     | 94           | 2.4   | 0.2  | 92      | 3.1   | 0.3  | -2.75 (-2.35, -3.15)        |
| Gary <sup>30</sup>                                                  | 2010 | 12 weeks       | 82 %                    | 18           | 8.4   | 5.6  | 15      | 9.3   | 4.9  | -0.17 (0.52, -0.86)         |
| Blumenthal <sup>35</sup>                                            | 2007 | 16 weeks       | 68%                     | 53           | 9.5   | 7.43 | 49      | 10.5  | 5.36 | -0.15 (0.24, -0.54)         |
| <b>SMD (95% CI)</b>                                                 |      |                |                         |              |       |      |         |       |      | <b>-1.03 (-2.89, 0.82)</b>  |
| <i>Combined home-based psychological intervention with exercise</i> |      |                |                         |              |       |      |         |       |      |                             |
| Gary <sup>30</sup>                                                  | 2010 | 12 weeks       | 85%                     | 16           | 6.5   | 3.7  | 15      | 9.3   | 4.9  | -0.65 (0.08, -1.37)         |
| Ciechanowski <sup>38</sup>                                          | 2004 | 24 weeks       | Not reported            | 72           | 0.71  | 0.6  | 66      | 1.17  | 0.53 | -0.81 (-0.46, -1.16)        |
| <b>SMD (95% CI)</b>                                                 |      |                |                         |              |       |      |         |       |      | <b>-0.78 (-1.09, -0.47)</b> |

**Table 3.** Risk ratios of incidence of remission between intervention and control groups

| Author                                                              | Year | Follow up time | Treatment Adherence | Intervention |              | Control   |              | RR (95% CI)              |
|---------------------------------------------------------------------|------|----------------|---------------------|--------------|--------------|-----------|--------------|--------------------------|
|                                                                     |      |                |                     | Remission    | No Remission | Remission | No Remission |                          |
| <i>Home-based Psychological intervention</i>                        |      |                |                     |              |              |           |              |                          |
| Kiosses <sup>25</sup>                                               | 2015 | 12 weeks       | Not reported        | 14           | 23           | 5         | 32           | 2.80 (1.12, 6.98)        |
| Gitlin <sup>24</sup>                                                | 2013 | 16 weeks       | 93.3%               | 39           | 50           | 25        | 68           | 1.63 (1.08, 2.46)        |
| Joling <sup>40</sup>                                                | 2011 | 12 weeks       | 41%                 | 31           | 55           | 25        | 59           | 1.47 (0.84, 2.55)        |
| Naylor <sup>39</sup>                                                | 2010 | 6 weeks        | 50.9%               | 11           | 4            | 9         | 9            | 1.21 (0.79, 1.87)        |
| <b>Pooled RR (95% CI)</b>                                           |      |                |                     |              |              |           |              | <b>1.53 (1.19, 1.98)</b> |
| <i>Home-based exercise</i>                                          |      |                |                     |              |              |           |              |                          |
| Ptaff <sup>27</sup>                                                 | 2014 | 12 weeks       | Not reported        | 49           | 29           | 40        | 28           | 1.07 (0.82-1.39)         |
| Blumenthal <sup>35</sup>                                            | 2007 | 16 weeks       | 68%                 | 21           | 32           | 23        | 26           | 0.84 (0.54-1.32)         |
| <b>Pooled RR (95% CI)</b>                                           |      |                |                     |              |              |           |              | <b>0.99 (0.79, 1.24)</b> |
| <i>Combined home-based psychological intervention with exercise</i> |      |                |                     |              |              |           |              |                          |
| Ciechanowski <sup>37</sup>                                          | 2010 | 19 weeks       | Not reported        | 4            | 36           | 0         | 40           | 9.00 (0.50-161.86)       |
| Ciechanowski <sup>38</sup>                                          | 2004 | 19 weeks       | Not reported        | 30           | 42           | 6         | 60           | 4.58 (2.04-10.31)        |
| Banerjee <sup>18</sup>                                              | 1996 | 24 weeks       | Not reported        | 19           | 10           | 9         | 23           | 2.33 (1.26-4.30)         |
| <b>Pooled RR (95% CI)</b>                                           |      |                |                     |              |              |           |              | <b>3.47 (2.11, 5.70)</b> |

CI, confidence interval; RR, risk ratio

1  
2  
3  
4  
5  
6  
7  
8  
9  
10  
11  
12  
13  
14  
15  
16  
17  
18  
19  
20  
21  
22  
23  
24  
25  
26  
27  
28  
29  
30  
31  
32  
33  
34  
35  
36  
37  
38  
39  
40  
41  
42  
43  
44  
45  
46  
47  
48  
49  
50  
51  
52  
53  
54  
55  
56  
57  
58  
59  
60

**Figure legends**

Figure 1. Flow chart of study selection

Figure 2. Network meta-analysis of disease remission among home-based interventions

For peer review only



Figure 1. Flow chart of study selection

206x212mm (300 x 300 DPI)



1  
2  
3  
4  
5  
6  
7  
8  
9  
10  
11  
12  
13  
14  
15  
16  
17  
18  
19  
20  
21  
22  
23  
24  
25  
26  
27  
28  
29  
30  
31  
32  
33  
34  
35  
36  
37  
38  
39  
40  
41  
42  
43  
44  
45  
46  
47  
48  
49  
50  
51  
52  
53  
54  
55  
56  
57  
58  
59  
60

1  
2  
3  
4  
5  
6  
7  
8  
9  
10  
11  
12  
13  
14  
15  
16  
17  
18  
19  
20  
21  
22  
23  
24  
25  
26  
27  
28  
29  
30  
31  
32  
33  
34  
35  
36  
37  
38  
39  
40  
41  
42  
43  
44  
45  
46  
47  
48  
49  
50  
51  
52  
53  
54  
55  
56  
57  
58  
59  
60

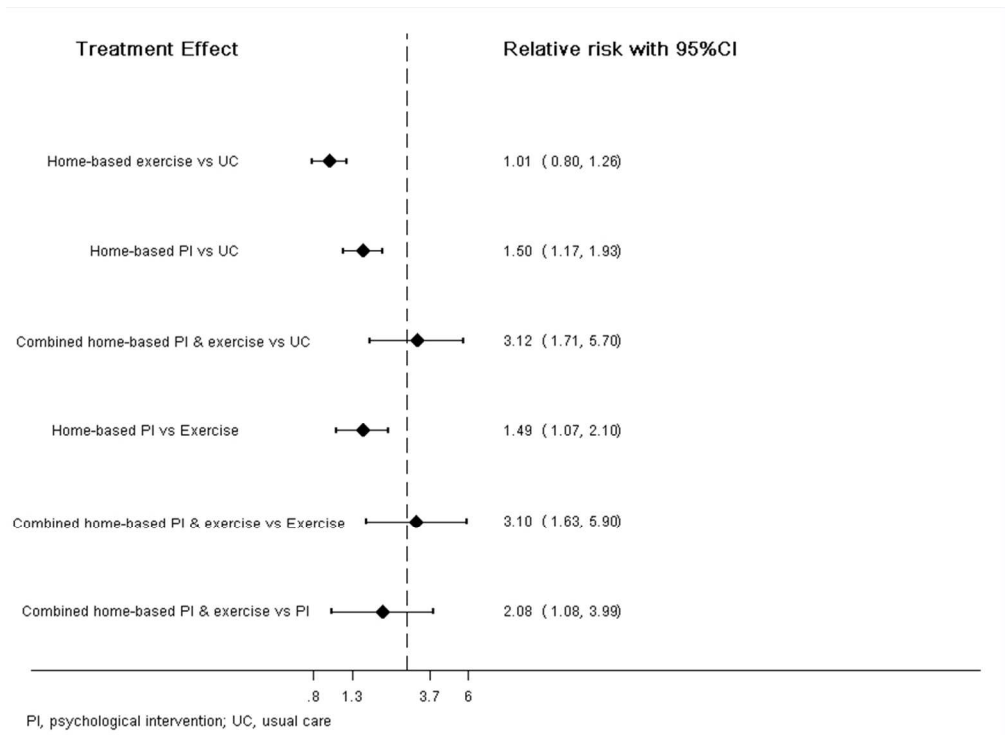

Figure 2. Network meta-analysis of disease remission among home-based interventions

305x222mm (72 x 72 DPI)

View only

## Supplementary Appendix

### Search strategy for Medline

(Depressive OR depression OR depressed) AND ("Home Care Services"[MeSH] OR "Home Care Agencies"[MeSH] OR "Home Nursing"[MeSH] OR "House Calls"[MeSH] OR "Community Health Planning"[MeSH] OR "Health Systems Agencies"[MeSH] OR "Community Health Nursing"[MeSH] OR "Social Support"[MeSH]) OR ("Home Based" OR "home support" OR ("home treatment" OR "home treatments") OR "home care" OR ("home visits" OR "Home visit") OR ("Health visits" OR "Health visit") OR ("home service" OR "home services")) Filters: Randomized Controlled Trial

### Search strategy for Scopus

(Depressive OR depression OR depressed) AND ("Home Based" OR "home support" OR ("home treatment" OR "home treatments") OR "home care" OR ("home visits" OR "Home visit") OR ("Health visits" OR "Health visit") OR ("home service" OR "home services") OR "home health care")

CINAHL

### Search strategy for CINAHL

(depressive OR depression OR depressed) AND ("Home Based" OR "home support" OR ("home treatment" OR "home treatments") OR "home care" OR ("home visits" OR "Home visit") OR ("Health visits" OR "Health visit") OR ("home service" OR "home services") OR "home health care") AND (randomized OR randomized)

1  
2  
3  
4  
5  
6  
7  
8  
9  
10  
11  
12  
13  
14  
15  
16  
17  
18  
19  
20  
21  
22  
23  
24  
25  
26  
27  
28  
29  
30  
31  
32  
33  
34  
35  
36  
37  
38  
39  
40  
41  
42  
43  
44  
45  
46  
47

**Supplementary Table 1.** Risk of bias assessment

| Author (Year) | Year | Random sequence generation | Allocation concealment | Blinding of participants and personnel | Blinding of outcome assessors | Incomplete outcome data | Selective outcome reporting | Other bias | Power of study |
|---------------|------|----------------------------|------------------------|----------------------------------------|-------------------------------|-------------------------|-----------------------------|------------|----------------|
| Rickhi        | 2011 | Low                        | Low                    | High                                   | Low                           | Low                     | Low                         | Low        | Low            |
| Banerjee      | 1996 | Low                        | Unclear                | High                                   | Low                           | Low                     | Low                         | Low        | Unclear        |
| Blumenthal    | 2007 | Low                        | Low                    | High                                   | Low                           | Low                     | Low                         | Low        | Low            |
| Choi          | 2014 | Unclear                    | Unclear                | High                                   | Unclear                       | High                    | Low                         | Low        | Unclear        |
| Chung         | 2010 | Low                        | Low                    | High                                   | unclear                       | High                    | Low                         | Low        | Unclear        |
| Ciechanowski  | 2010 | Low                        | Low                    | High                                   | Low                           | Low                     | High                        | Low        | Unclear        |
| Ciechanowski  | 2004 | Low                        | Low                    | High                                   | Unclear                       | Low                     | Low                         | Low        | Unclear        |
| Gary          | 2010 | Unclear                    | Unclear                | High                                   | Low                           | Low                     | Low                         | Low        | Unclear        |
| Gellis        | 2010 | Unclear                    | Unclear                | High                                   | Low                           | Low                     | Low                         | Low        | Unclear        |
| Gellis        | 2008 | Low                        | Unclear                | High                                   | Low                           | Low                     | Low                         | Low        | Unclear        |
| Gitlin        | 2013 | Low                        | Low                    | High                                   | Unclear                       | Low                     | Low                         | Low        | Low            |
| Kerse         | 2010 | Low                        | Unclear                | High                                   | Low                           | Low                     | Low                         | Low        | Low            |
| Kiosses       | 2015 | Low                        | Unclear                | High                                   | Low                           | Low                     | Low                         | Low        | Low            |
| Klug          | 2010 | Low                        | Unclear                | High                                   | Unclear                       | High                    | Low                         | Low        | Low            |
| Pfaff         | 2014 | Low                        | Unclear                | High                                   | Low                           | Low                     | Low                         | Low        | High           |
| Joling        | 2011 | Low                        | Unclear                | High                                   | Unclear                       | Low                     | Low                         | Low        | Unclear        |
| Naylor        | 2010 | Low                        | Unclear                | High                                   | Unclear                       | High                    | Low                         | Low        | Unclear        |

Supplementary Table 2. Characteristics of studies included in network meta-analysis

| Author                                       |              | Type of depression        | Participants |            |            |                  |             |                                  |                          | Study's intervention |                                                                                  |
|----------------------------------------------|--------------|---------------------------|--------------|------------|------------|------------------|-------------|----------------------------------|--------------------------|----------------------|----------------------------------------------------------------------------------|
|                                              |              |                           | N            | Age (mean) | Female (%) | Living alone (%) | Married (%) | Baseline depression score (mean) | Anti-depressants use (%) | Duration (weeks)     | Definition of usual care                                                         |
| <b>Home-based Psychological intervention</b> |              |                           |              |            |            |                  |             |                                  |                          |                      |                                                                                  |
| Kiosses                                      | Intervention | Major depressive disorder | 37           | 80.78      | 70.27      | NA               | NA          | 21.08 <sup>a</sup>               | 64.86                    | 12 weeks             | Care includes antidepressant medication and home visiting.                       |
|                                              | Control      |                           | 37           | 81.03      | 78.38      | NA               | NA          | 21.41 <sup>a</sup>               | 62.16                    |                      |                                                                                  |
| Gitlin                                       | Intervention | Mixed depression          | 106          | 68.9       | 79.3       | 47.32            | 15.1        | 13.65 <sup>c</sup>               | 22.6                     | 16 weeks             | Not clearly defined.                                                             |
|                                              | Control      |                           | 102          | 70.3       | 77.5       | 66.7             | 8.8         | 12.9 <sup>c</sup>                | 15.8                     |                      |                                                                                  |
| Naylor                                       | Intervention | Mixed depression          | 19           | 48.6       | 94.7       | NA               | NA          | 8.3 <sup>f</sup>                 | NA                       | 6 weeks              | Care includes antidepressant medication and referral to psychotherapy if needed. |
|                                              | Control      |                           | 19           | 54.3       | 73.7       | NA               | NA          | 7.5 <sup>f</sup>                 | NA                       |                      |                                                                                  |
| Joling                                       | Intervention | Minor depression          | 86           | 81.8       | 69.8       | NA               | 30.2        | 21.17 <sup>g</sup>               | NA                       | 12 weeks             | Care includes antidepressant medication.                                         |
|                                              | Control      |                           | 84           | 81.1       | 77.4       | NA               | 28.6        | 22.05 <sup>g</sup>               | NA                       |                      |                                                                                  |
| <b>Home-based Exercise</b>                   |              |                           |              |            |            |                  |             |                                  |                          |                      |                                                                                  |
| Pfaff                                        | Intervention | Mixed depression          | 108          | 61.2       | 62         | 22.4             | 48.1        | NA                               | 60.2                     | 12 weeks             | Not clearly defined.                                                             |
|                                              | Control      |                           | 92           | 60.7       | 64.1       | 20.7             | 58.7        | NA                               | 47.8                     |                      |                                                                                  |



| Author                                                                     |              | Type of depression        | Participants |            |            |                  |             |                                  |                          | Study's intervention |                                                                     |
|----------------------------------------------------------------------------|--------------|---------------------------|--------------|------------|------------|------------------|-------------|----------------------------------|--------------------------|----------------------|---------------------------------------------------------------------|
|                                                                            |              |                           | N            | Age (mean) | Female (%) | Living alone (%) | Married (%) | Baseline depression score (mean) | Anti-depressants use (%) | Duration (weeks)     | Definition of usual care                                            |
| Blumenthal                                                                 | Intervention | Major depressive disorder | 53           | 53         | 74         | NA               | NA          | 17+/-5 <sup>b</sup>              | 0                        | 16 weeks             | Antidepressant medication only.                                     |
|                                                                            | Control      |                           | 49           | 52         | 75         | NA               | NA          | 16+/-4 <sup>b</sup>              | 100                      |                      |                                                                     |
| <b><i>Combined home-based psychological intervention with exercise</i></b> |              |                           |              |            |            |                  |             |                                  |                          |                      |                                                                     |
| Ciechanowski                                                               | Intervention | Mixed depression          | 40           | 43.4       | 47.5       | NA               | 65          | 2.1 <sup>d</sup>                 | 37.5                     | 19 weeks             | Not clearly defined.                                                |
|                                                                            | Control      |                           | 40           | 44.1       | 57.5       | NA               | 72.5        | 1.9 <sup>d</sup>                 | 42.5                     |                      |                                                                     |
| Ciechanowski                                                               | Intervention | Minor depression          | 72           | 72.6       | 82         | 78               | 11.0        | 1.3 <sup>d</sup>                 | 40                       | 19 weeks             | Not clearly defined                                                 |
|                                                                            | Control      |                           | 66           | 73.5       | 76         | 65               | 11.0        | 1.2 <sup>d</sup>                 | 30                       |                      |                                                                     |
| Banerjee                                                                   | Intervention | Mixed depression          | 33           | 80.4       | 85         | 82               | 18          | 27.5 <sup>a</sup>                | 11                       | 24 weeks             | Care by general practitioners, with psychiatric referral if needed. |
|                                                                            | Control      |                           | 36           | 81         | 81         | 75               | 14          | 25.1 <sup>a</sup>                | 12                       |                      |                                                                     |

<sup>a</sup>MADRS; <sup>b</sup>HAMD; <sup>c</sup>PHQ-9; <sup>d</sup>HSCL-20; <sup>e</sup>GDS; <sup>f</sup>BDI

1  
2  
3 **Supplementary Figure legends**  
4

5  
6 **Supplementary Figure 1.** Pooled standardized mean difference between home-based psychological  
7 intervention and usual care according to severities of depression  
8

9  
10 **Supplementary Figure 2.** Pooled standardized mean difference between home-based exercise,  
11 combined psychological intervention with exercise and usual care  
12  
13

14  
15 **Supplementary Figure 3.** Pooled risk ratio of disease remission between home-based psychological  
16 intervention and usual care  
17

18  
19 **Supplementary Figure 4.** Pooled risk ratio of disease remission between home-based exercise,  
20 combined psychological intervention with exercise and usual care  
21  
22

23  
24 **Supplementary Figure 5.** Network plot of all available home-based interventions  
25

26  
27 **Supplementary Figure 6.** Funnel plots of home-based psychological intervention and home-based  
28 exercise  
29

30  
31 **Supplementary Figure 7.** Funnel and contour enhanced funnel plot of combined psychological  
32 intervention with exercise  
33  
34

Supplementary Figure 1



For peer review only

Supplementary Figure 2

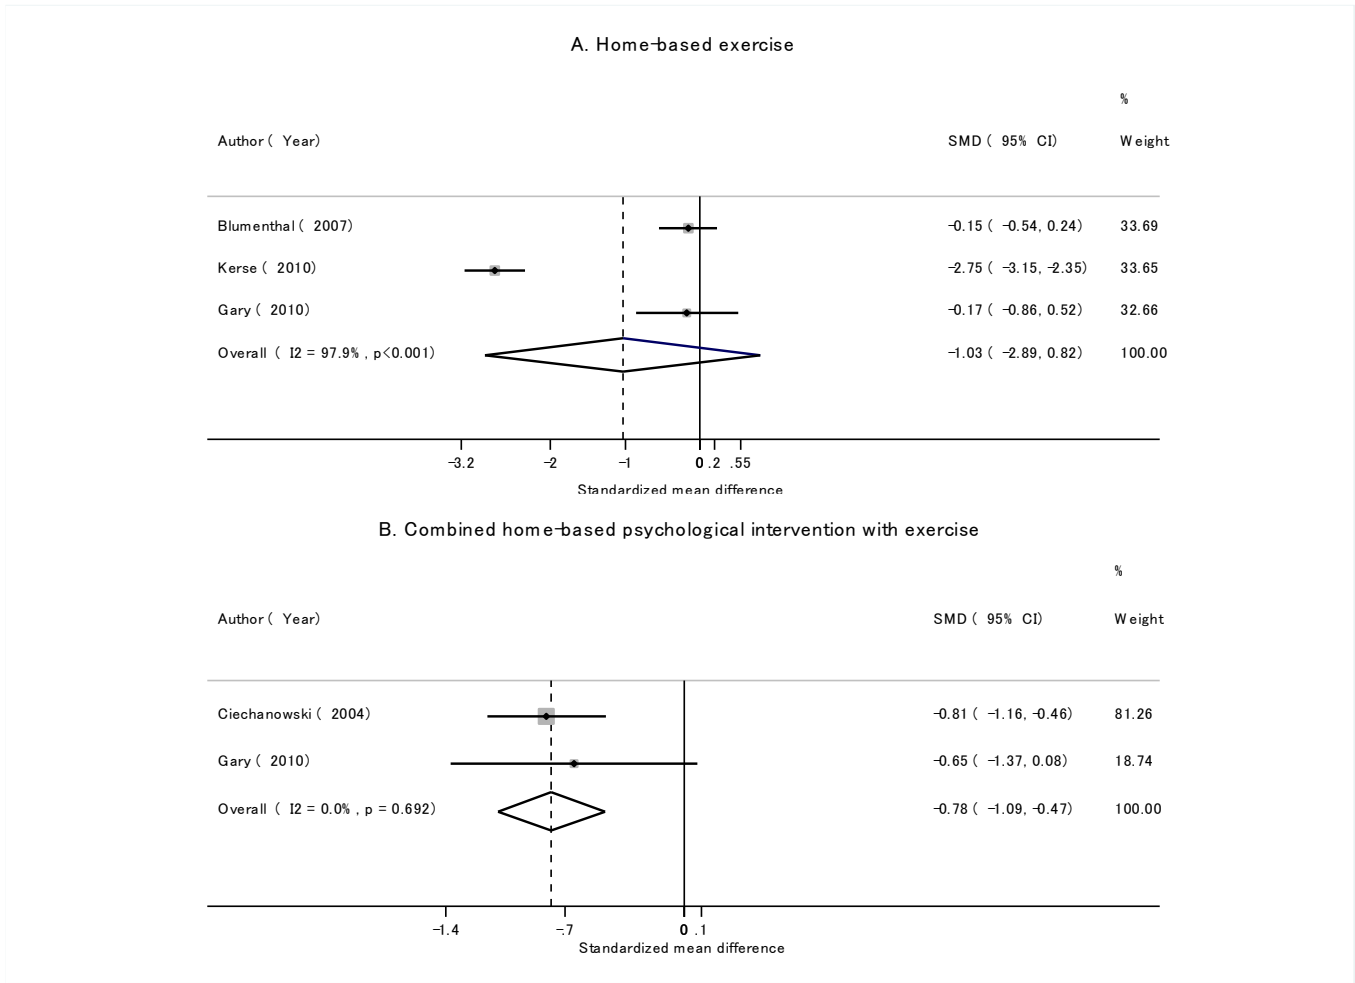

Supplementary Figure 3

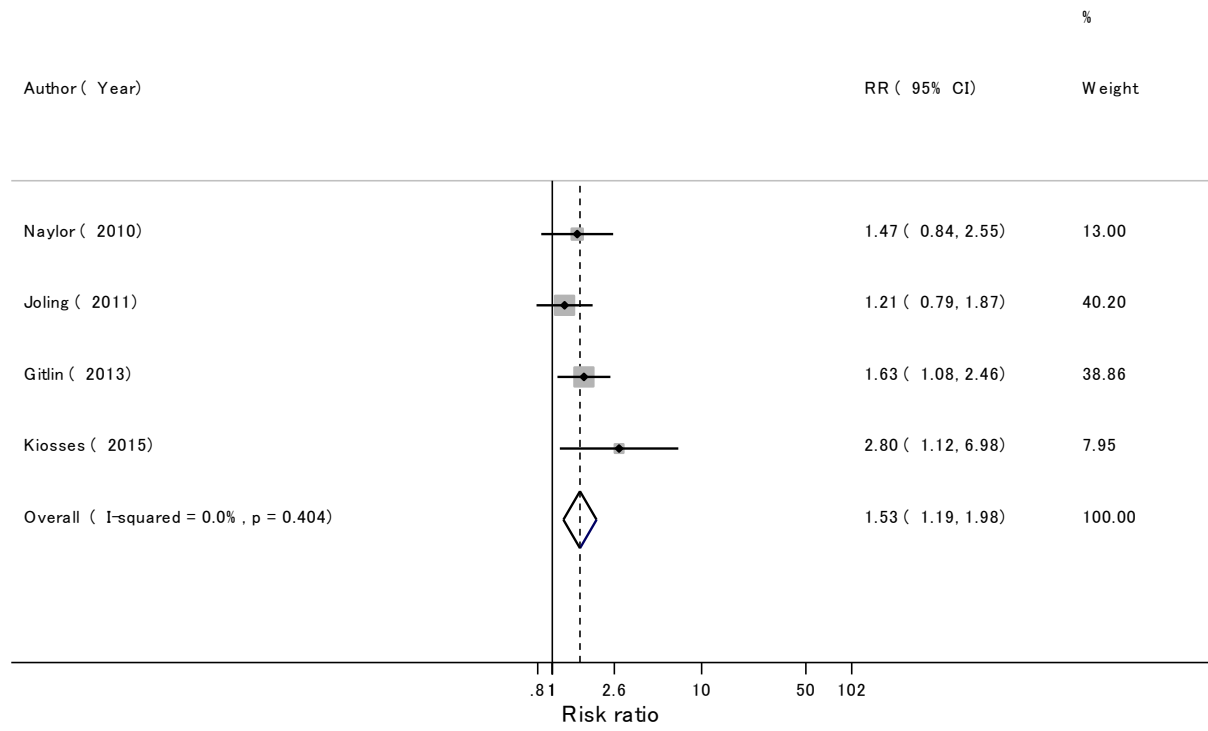

Review only

Supplementary Figure 4

A. Home-based exercise

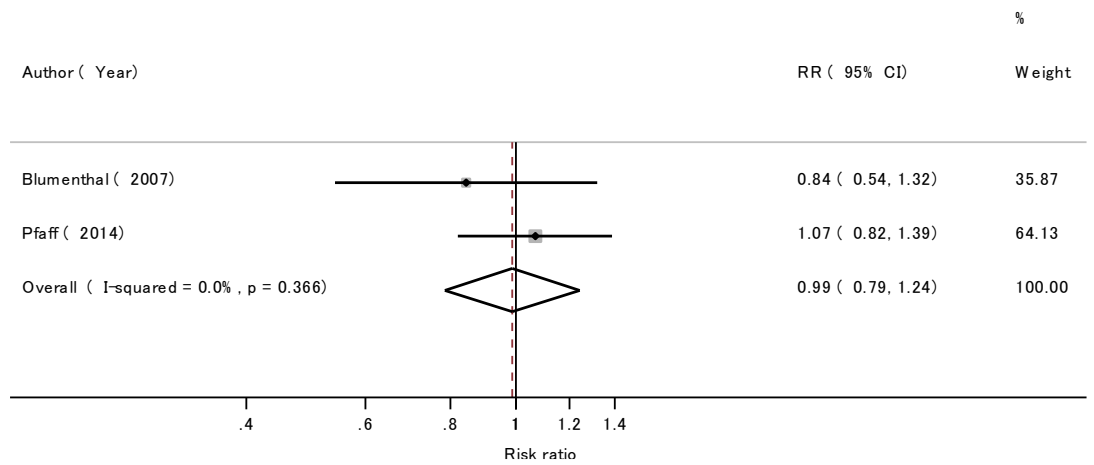

B. Combined home-based psychological intervention with exercise

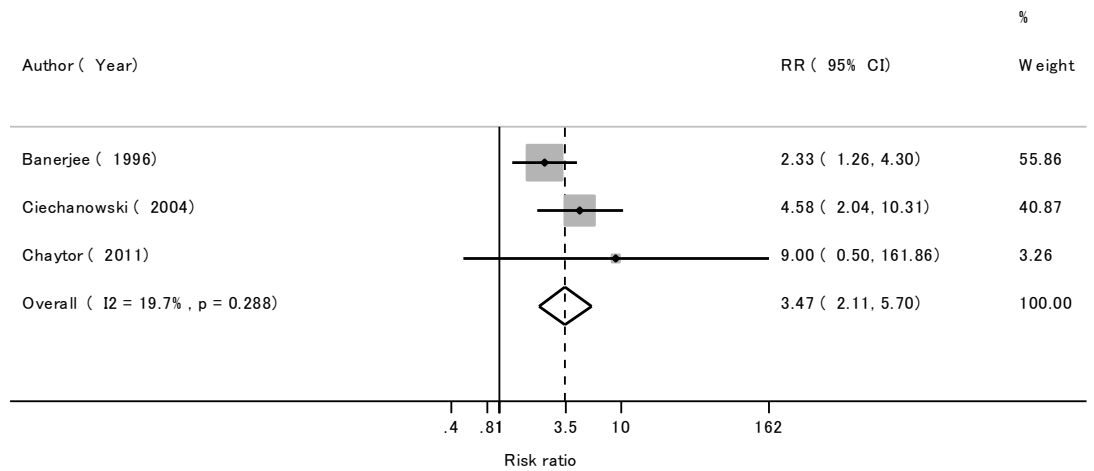

1  
2  
3  
4  
5  
6  
7  
8  
9  
10  
11  
12  
13  
14  
15  
16  
17  
18  
19  
20  
21  
22  
23  
24  
25  
26  
27  
28  
29  
30  
31  
32  
33  
34  
35  
36  
37  
38  
39  
40  
41  
42  
43  
44  
45  
46  
47  
48  
49  
50  
51  
52  
53  
54  
55  
56  
57  
58  
59  
60

Supplementary Figure 5

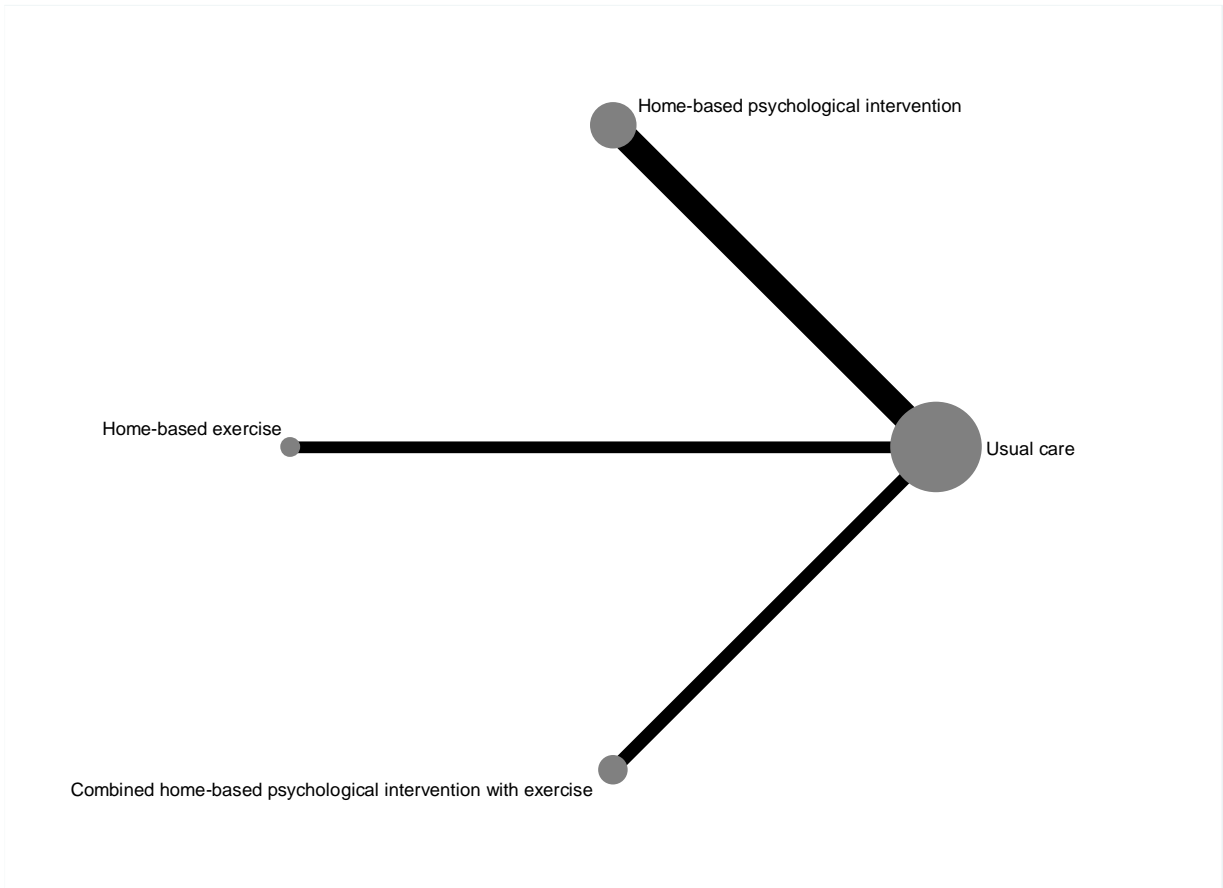

view only

Supplementary Figure 6

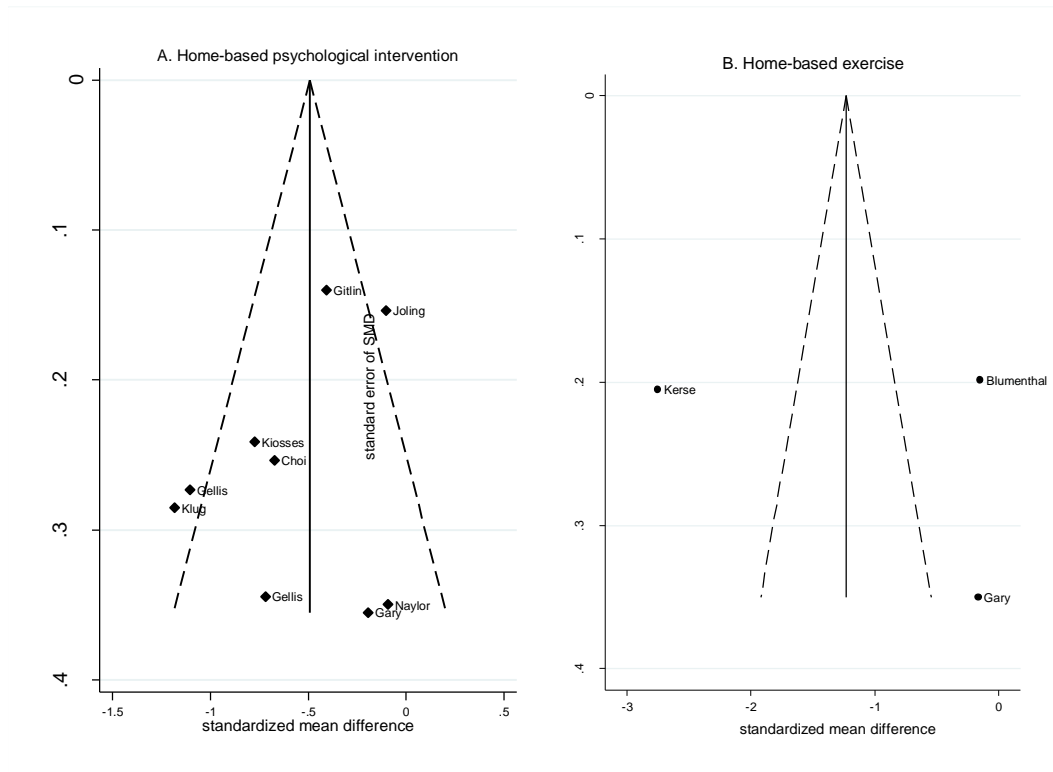

review only



Supplementary Figure 7

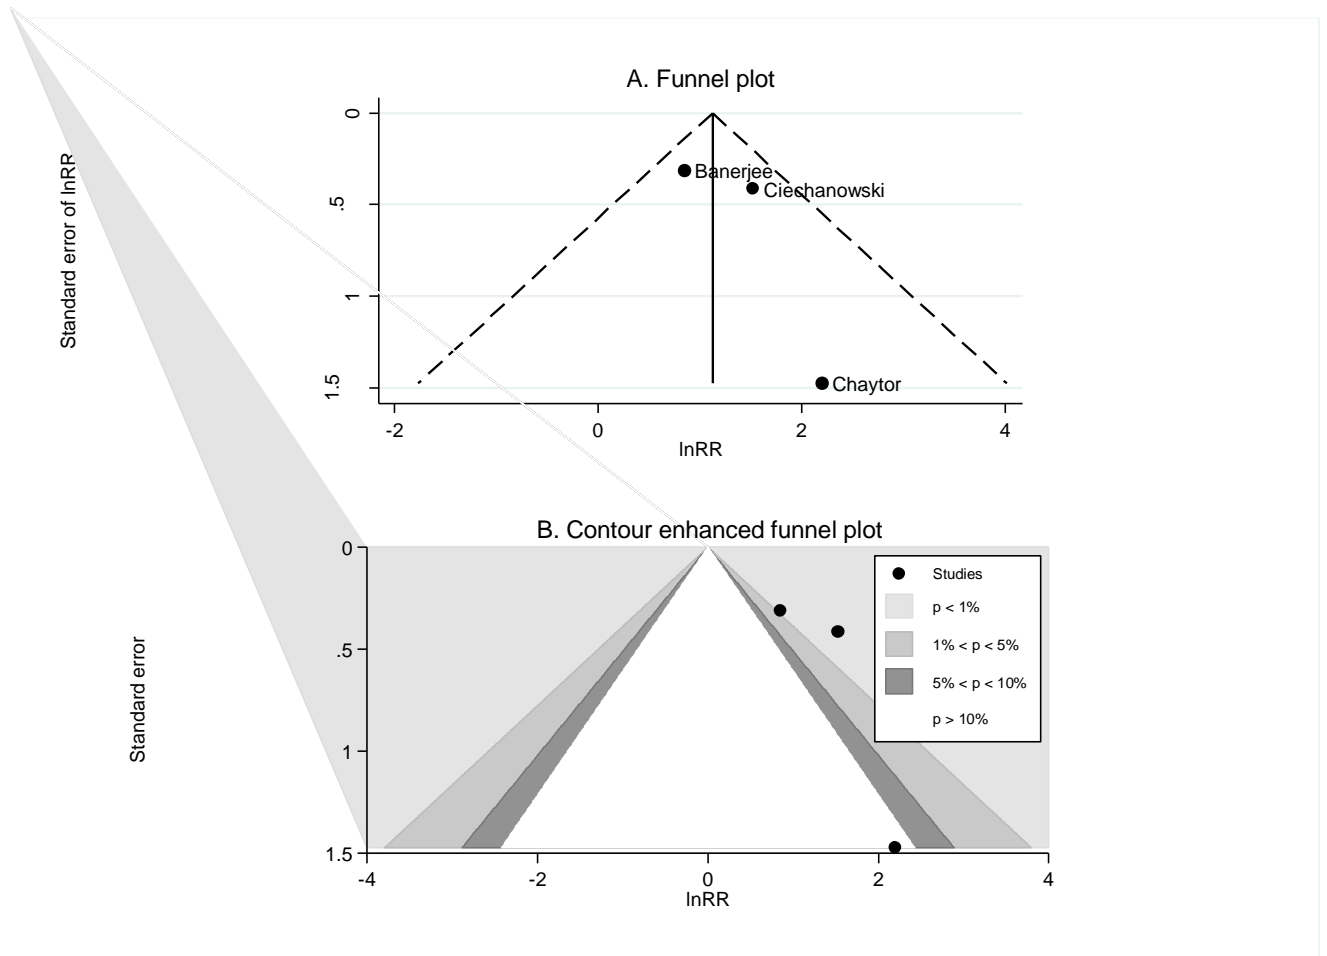

Review only

1  
2  
3  
4  
5  
6  
7  
8  
9  
10  
11  
12  
13  
14  
15  
16  
17  
18  
19  
20  
21  
22  
23  
24  
25  
26  
27  
28  
29  
30  
31  
32  
33  
34  
35  
36  
37  
38  
39  
40  
41  
42  
43  
44  
45  
46  
47  
48  
49  
50  
51  
52  
53  
54  
55  
56  
57  
58  
59  
60

Supplementary Table 1. Risk of bias assessment

| Author (Year) | Year | Random sequence generation | Allocation concealment | Blinding of participants and personnel | Blinding of outcome assessors | Incomplete outcome data | Selective outcome reporting | Other bias | Power of study |
|---------------|------|----------------------------|------------------------|----------------------------------------|-------------------------------|-------------------------|-----------------------------|------------|----------------|
| Rickhi        | 2011 | Low                        | Low                    | High                                   | Low                           | Low                     | Low                         | Low        | Low            |
| Banerjee      | 1996 | Low                        | Unclear                | High                                   | Low                           | Low                     | Low                         | Low        | Unclear        |
| Blumenthal    | 2007 | Low                        | Low                    | High                                   | Low                           | Low                     | Low                         | Low        | Low            |
| Choi          | 2014 | Unclear                    | Unclear                | High                                   | Unclear                       | High                    | Low                         | Low        | Unclear        |
| Chung         | 2010 | Low                        | Low                    | High                                   | unclear                       | High                    | Low                         | Low        | Unclear        |
| Ciechanowski  | 2010 | Low                        | Low                    | High                                   | Low                           | Low                     | High                        | Low        | Unclear        |
| Ciechanowski  | 2004 | Low                        | Low                    | High                                   | Unclear                       | Low                     | Low                         | Low        | Unclear        |
| Gary          | 2010 | Unclear                    | Unclear                | High                                   | Low                           | Low                     | Low                         | Low        | Unclear        |
| Gellis        | 2010 | Unclear                    | Unclear                | High                                   | Low                           | Low                     | Low                         | Low        | Unclear        |
| Gellis        | 2008 | Low                        | Unclear                | High                                   | Low                           | Low                     | Low                         | Low        | Unclear        |
| Gitlin        | 2013 | Low                        | Low                    | High                                   | Unclear                       | Low                     | Low                         | Low        | Low            |
| Kerse         | 2010 | Low                        | Unclear                | High                                   | Low                           | Low                     | Low                         | Low        | Low            |
| Kiosses       | 2015 | Low                        | Unclear                | High                                   | Low                           | Low                     | Low                         | Low        | Low            |
| Klug          | 2010 | Low                        | Unclear                | High                                   | Unclear                       | High                    | Low                         | Low        | Low            |
| Pfaff         | 2014 | Low                        | Unclear                | High                                   | Low                           | Low                     | Low                         | Low        | High           |
| Joling        | 2011 | Low                        | Unclear                | High                                   | Unclear                       | Low                     | Low                         | Low        | Unclear        |
| Naylor        | 2010 | Low                        | Unclear                | High                                   | Unclear                       | High                    | Low                         | Low        | Unclear        |

Supplementary Table 2. Characteristics of studies included in network meta-analysis

| Author                                       |              | Type of depression        | Participants |            |            |                  |             |                                  |                          | Study's intervention |                                                                                  |
|----------------------------------------------|--------------|---------------------------|--------------|------------|------------|------------------|-------------|----------------------------------|--------------------------|----------------------|----------------------------------------------------------------------------------|
|                                              |              |                           | N            | Age (mean) | Female (%) | Living alone (%) | Married (%) | Baseline depression score (mean) | Anti-depressants use (%) | Duration (weeks)     | Definition of usual care                                                         |
| <b>Home-based Psychological intervention</b> |              |                           |              |            |            |                  |             |                                  |                          |                      |                                                                                  |
| Kiosses                                      | Intervention | Major depressive disorder | 37           | 80.78      | 70.27      | NA               | NA          | 21.08 <sup>a</sup>               | 64.86                    | 12 weeks             | Care includes antidepressant medication and home visiting.                       |
|                                              | Control      |                           | 37           | 81.03      | 78.38      | NA               | NA          | 21.41 <sup>a</sup>               | 62.16                    |                      |                                                                                  |
| Gitlin                                       | Intervention | Mixed depression          | 106          | 68.9       | 79.3       | 47.32            | 15.1        | 13.65 <sup>c</sup>               | 22.6                     | 16 weeks             | Not clearly defined.                                                             |
|                                              | Control      |                           | 102          | 70.3       | 77.5       | 66.7             | 8.8         | 12.9 <sup>c</sup>                | 15.8                     |                      |                                                                                  |
| Naylor                                       | Intervention | Mixed depression          | 19           | 48.6       | 94.7       | NA               | NA          | 8.3 <sup>f</sup>                 | NA                       | 6 weeks              | Care includes antidepressant medication and referral to psychotherapy if needed. |
|                                              | Control      |                           | 19           | 54.3       | 73.7       | NA               | NA          | 7.5 <sup>f</sup>                 | NA                       |                      |                                                                                  |
| Joling                                       | Intervention | Minor depression          | 86           | 81.8       | 69.8       | NA               | 30.2        | 21.17 <sup>g</sup>               | NA                       | 12 weeks             | Care includes antidepressant medication.                                         |
|                                              | Control      |                           | 84           | 81.1       | 77.4       | NA               | 28.6        | 22.05 <sup>g</sup>               | NA                       |                      |                                                                                  |
| <b>Home-based Exercise</b>                   |              |                           |              |            |            |                  |             |                                  |                          |                      |                                                                                  |
| Pfaff                                        | Intervention | Mixed depression          | 108          | 61.2       | 62         | 22.4             | 48.1        | NA                               | 60.2                     | 12 weeks             | Not clearly defined.                                                             |
|                                              | Control      |                           | 92           | 60.7       | 64.1       | 20.7             | 58.7        | NA                               | 47.8                     |                      |                                                                                  |

| Author                                                                     |              | Type of depression        | Participants |            |            |                  |             |                                  |                          | Study's intervention |                                                                     |
|----------------------------------------------------------------------------|--------------|---------------------------|--------------|------------|------------|------------------|-------------|----------------------------------|--------------------------|----------------------|---------------------------------------------------------------------|
|                                                                            |              |                           | N            | Age (mean) | Female (%) | Living alone (%) | Married (%) | Baseline depression score (mean) | Anti-depressants use (%) | Duration (weeks)     | Definition of usual care                                            |
| Blumenthal                                                                 | Intervention | Major depressive disorder | 53           | 53         | 74         | NA               | NA          | 17+/-5 <sup>b</sup>              | 0                        | 16 weeks             | Antidepressant medication only.                                     |
|                                                                            | Control      |                           | 49           | 52         | 75         | NA               | NA          | 16+/-4 <sup>b</sup>              | 100                      |                      |                                                                     |
| <b><i>Combined home-based psychological intervention with exercise</i></b> |              |                           |              |            |            |                  |             |                                  |                          |                      |                                                                     |
| Ciechanowski                                                               | Intervention | Mixed depression          | 40           | 43.4       | 47.5       | NA               | 65          | 2.1 <sup>d</sup>                 | 37.5                     | 19 weeks             | Not clearly defined.                                                |
|                                                                            | Control      |                           | 40           | 44.1       | 57.5       | NA               | 72.5        | 1.9 <sup>d</sup>                 | 42.5                     |                      |                                                                     |
| Ciechanowski                                                               | Intervention | Minor depression          | 72           | 72.6       | 82         | 78               | 11.0        | 1.3 <sup>d</sup>                 | 40                       | 19 weeks             | Not clearly defined                                                 |
|                                                                            | Control      |                           | 66           | 73.5       | 76         | 65               | 11.0        | 1.2 <sup>d</sup>                 | 30                       |                      |                                                                     |
| Banerjee                                                                   | Intervention | Mixed depression          | 33           | 80.4       | 85         | 82               | 18          | 27.5 <sup>a</sup>                | 11                       | 24 weeks             | Care by general practitioners, with psychiatric referral if needed. |
|                                                                            | Control      |                           | 36           | 81         | 81         | 75               | 14          | 25.1 <sup>a</sup>                | 12                       |                      |                                                                     |

<sup>a</sup>MADRS; <sup>b</sup>HAMD; <sup>c</sup>PHQ-9; <sup>d</sup>HSCL-20; <sup>e</sup>GDS; <sup>f</sup>BDI

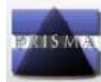

# PRISMA 2009 Checklist

| Section/topic                      | #  | Checklist item                                                                                                                                                                                                                                                                                              | Reported on page #     |
|------------------------------------|----|-------------------------------------------------------------------------------------------------------------------------------------------------------------------------------------------------------------------------------------------------------------------------------------------------------------|------------------------|
| <b>TITLE</b>                       |    |                                                                                                                                                                                                                                                                                                             |                        |
| Title                              | 1  | Identify the report as a systematic review, meta-analysis, or both.                                                                                                                                                                                                                                         | 1                      |
| <b>ABSTRACT</b>                    |    |                                                                                                                                                                                                                                                                                                             |                        |
| Structured summary                 | 2  | Provide a structured summary including, as applicable: background; objectives; data sources; study eligibility criteria, participants, and interventions; study appraisal and synthesis methods; results; limitations; conclusions and implications of key findings; systematic review registration number. | 3                      |
| <b>INTRODUCTION</b>                |    |                                                                                                                                                                                                                                                                                                             |                        |
| Rationale                          | 3  | Describe the rationale for the review in the context of what is already known.                                                                                                                                                                                                                              | 5                      |
| Objectives                         | 4  | Provide an explicit statement of questions being addressed with reference to participants, interventions, comparisons, outcomes, and study design (PICOS).                                                                                                                                                  | 5, 6                   |
| <b>METHODS</b>                     |    |                                                                                                                                                                                                                                                                                                             |                        |
| Protocol and registration          | 5  | Indicate if a review protocol exists, if and where it can be accessed (e.g., Web address), and, if available, provide registration information including registration number.                                                                                                                               | -                      |
| Eligibility criteria               | 6  | Specify study characteristics (e.g., PICOS, length of follow-up) and report characteristics (e.g., years considered, language, publication status) used as criteria for eligibility, giving rationale.                                                                                                      | 6, 7                   |
| Information sources                | 7  | Describe all information sources (e.g., databases with dates of coverage, contact with study authors to identify additional studies) in the search and date last searched.                                                                                                                                  | 6                      |
| Search                             | 8  | Present full electronic search strategy for at least one database, including any limits used, such that it could be repeated.                                                                                                                                                                               | Supplementary Appendix |
| Study selection                    | 9  | State the process for selecting studies (i.e., screening, eligibility, included in systematic review, and, if applicable, included in the meta-analysis).                                                                                                                                                   | 6                      |
| Data collection process            | 10 | Describe method of data extraction from reports (e.g., piloted forms, independently, in duplicate) and any processes for obtaining and confirming data from investigators.                                                                                                                                  | 7                      |
| Data items                         | 11 | List and define all variables for which data were sought (e.g., PICOS, funding sources) and any assumptions and simplifications made.                                                                                                                                                                       | 7                      |
| Risk of bias in individual studies | 12 | Describe methods used for assessing risk of bias of individual studies (including specification of whether this was done at the study or outcome level), and how this information is to be used in any data synthesis.                                                                                      | 8                      |
| Summary measures                   | 13 | State the principal summary measures (e.g., risk ratio, difference in means).                                                                                                                                                                                                                               | 8                      |
| Synthesis of results               | 14 | Describe the methods of handling data and combining results of studies, if done, including measures of consistency (e.g., $I^2$ ) for each meta-analysis.                                                                                                                                                   | 8                      |

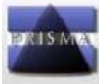

# PRISMA 2009 Checklist

Page 1 of 2

| Section/topic                 | #  | Checklist item                                                                                                                                                                                           | Reported on page #                                          |
|-------------------------------|----|----------------------------------------------------------------------------------------------------------------------------------------------------------------------------------------------------------|-------------------------------------------------------------|
| Risk of bias across studies   | 15 | Specify any assessment of risk of bias that may affect the cumulative evidence (e.g., publication bias, selective reporting within studies).                                                             | 9                                                           |
| Additional analyses           | 16 | Describe methods of additional analyses (e.g., sensitivity or subgroup analyses, meta-regression), if done, indicating which were pre-specified.                                                         | 8                                                           |
| <b>RESULTS</b>                |    |                                                                                                                                                                                                          |                                                             |
| Study selection               | 17 | Give numbers of studies screened, assessed for eligibility, and included in the review, with reasons for exclusions at each stage, ideally with a flow diagram.                                          | 9, Figure 1                                                 |
| Study characteristics         | 18 | For each study, present characteristics for which data were extracted (e.g., study size, PICOS, follow-up period) and provide the citations.                                                             | 9, 10, 11, 12 & Table 1                                     |
| Risk of bias within studies   | 19 | Present data on risk of bias of each study and, if available, any outcome level assessment (see item 12).                                                                                                | 12 & Supplementary Table 1                                  |
| Results of individual studies | 20 | For all outcomes considered (benefits or harms), present, for each study: (a) simple summary data for each intervention group (b) effect estimates and confidence intervals, ideally with a forest plot. | Tables 2 & 3<br>Figure 2<br>Supplementary Figure 1, 2, 3, 4 |
| Synthesis of results          | 21 | Present results of each meta-analysis done, including confidence intervals and measures of consistency.                                                                                                  | 12-16                                                       |
| Risk of bias across studies   | 22 | Present results of any assessment of risk of bias across studies (see Item 15).                                                                                                                          | 16                                                          |
| Additional analysis           | 23 | Give results of additional analyses, if done (e.g., sensitivity or subgroup analyses, meta-regression [see Item 16]).                                                                                    | 12-16                                                       |
| <b>DISCUSSION</b>             |    |                                                                                                                                                                                                          |                                                             |
| Summary of evidence           | 24 | Summarize the main findings including the strength of evidence for each main outcome; consider their relevance to key groups (e.g., healthcare providers, users, and policy makers).                     | 16-19                                                       |
| Limitations                   | 25 | Discuss limitations at study and outcome level (e.g., risk of bias), and at review-level (e.g., incomplete retrieval of identified research, reporting bias).                                            | 18                                                          |
| Conclusions                   | 26 | Provide a general interpretation of the results in the context of other evidence, and implications for future research.                                                                                  | 19                                                          |
| <b>FUNDING</b>                |    |                                                                                                                                                                                                          |                                                             |
| Funding                       | 27 | Describe sources of funding for the systematic review and other support (e.g., supply of data); role of funders for the systematic review.                                                               | 19                                                          |



# PRISMA 2009 Checklist

1  
2  
3  
4  
5  
6  
7  
8  
9  
10  
11  
12  
13  
14  
15  
16  
17  
18  
19  
20  
21  
22  
23  
24  
25  
26  
27  
28  
29  
30  
31  
32  
33  
34  
35  
36  
37  
38  
39  
40  
41  
42  
43  
44  
45  
46  
47  
48  
49

From: Moher D, Liberati A, Tetzlaff J, Altman DG, The PRISMA Group (2009). Preferred Reporting Items for Systematic Reviews and Meta-Analyses: The PRISMA Statement. PLoS Med 6(6): e1000097. doi:10.1371/journal.pmed1000097

For more information, visit: [www.prisma-statement.org](http://www.prisma-statement.org).

Page 2 of 2

For peer review only
