# Supplementary material for: Efficacy of home-based non-pharmacological interventions for treating depression: a systematic review and network meta-analysis of randomised controlled trials
Source: PubMed Central journal article supplement — BMJ Open. 2017 Jul 12;7(7):e014499. doi: 10.1136/bmjopen-2016-014499 (PMC5734422; doi:10.1136/bmjopen-2016-014499), 2017-07-12
Supplement: bmjopen-2016-014499supp001.pdf [file bmjopen-2016-014499supp001.pdf]

## **Supplementary Appendix**

### **Search strategy for Medline**

(Depressive OR depression OR depressed) AND ("Home Care Services"[MeSH] OR "Home Care Agencies"[MeSH] OR "Home Nursing"[MeSH] OR "House Calls"[MeSH] OR "Community Health Planning"[MeSH] OR "Health Systems Agencies"[MeSH] OR "Community Health Nursing"[MeSH] OR "Social Support"[MeSH]) OR ("Home Based" OR "home support" OR ("home treatment" OR "home treatments") OR "home care" OR ("home visits" OR "Home visit") OR ("Health visits" OR "Health visit") OR ("home service" OR "home services")) Filters: Randomized Controlled Trial

### **Search strategy for Scopus**

(Depressive OR depression OR depressed) AND ("Home Based" OR "home support" OR ("home treatment" OR "home treatments") OR "home care" OR ("home visits" OR "Home visit") OR ("Health visits" OR "Health visit") OR ("home service" OR "home services") OR "home health care")

CINAHL

### **Search strategy for CINAHL**

(depressive OR depression OR depressed) AND ("Home Based" OR "home support" OR ("home treatment" OR "home treatments") OR "home care" OR ("home visits" OR "Home visit") OR ("Health visits" OR "Health visit") OR ("home service" OR "home services") OR "home health care") AND (randomized OR randomized)
