# Supplementary material for: Efficacy of home-based non-pharmacological interventions for treating depression: a systematic review and network meta-analysis of randomised controlled trials
Source: PubMed Central journal article supplement — BMJ Open. 2017 Jul 12;7(7):e014499. doi: 10.1136/bmjopen-2016-014499 (PMC5734422; doi:10.1136/bmjopen-2016-014499), 2017-07-12
Supplement: bmjopen-2016-014499supp003.pdf [file bmjopen-2016-014499supp003.pdf]

**Supplementary Table 1.** Risk of bias assessment

| <b>Author (Year)</b> | <b>Year</b> | <b>Random sequence generation</b> | <b>Allocation concealment</b> | <b>Blinding of participants and personnel</b> | <b>Blinding of outcome assessors</b> | <b>Incomplete outcome data</b> | <b>Selective outcome reporting</b> | <b>Other bias</b> | <b>Power of study</b> |
|----------------------|-------------|-----------------------------------|-------------------------------|-----------------------------------------------|--------------------------------------|--------------------------------|------------------------------------|-------------------|-----------------------|
| Rickhi               | 2011        | Low                               | Low                           | High                                          | Low                                  | Low                            | Low                                | Low               | Low                   |
| Banerjee             | 1996        | Low                               | Unclear                       | High                                          | Low                                  | Low                            | Low                                | Low               | Unclear               |
| Blumenthal           | 2007        | Low                               | Low                           | High                                          | Low                                  | Low                            | Low                                | Low               | Low                   |
| Choi                 | 2014        | Unclear                           | Unclear                       | High                                          | Unclear                              | High                           | Low                                | Low               | Unclear               |
| Chung                | 2010        | Low                               | Low                           | High                                          | unclear                              | High                           | Low                                | Low               | Unclear               |
| Ciechanowski         | 2010        | Low                               | Low                           | High                                          | Low                                  | Low                            | High                               | Low               | Unclear               |
| Ciechanowski         | 2004        | Low                               | Low                           | High                                          | Unclear                              | Low                            | Low                                | Low               | Unclear               |
| Gary                 | 2010        | Unclear                           | Unclear                       | High                                          | Low                                  | Low                            | Low                                | Low               | Unclear               |
| Gellis               | 2010        | Unclear                           | Unclear                       | High                                          | Low                                  | Low                            | Low                                | Low               | Unclear               |
| Gellis               | 2008        | Low                               | Unclear                       | High                                          | Low                                  | Low                            | Low                                | Low               | Unclear               |
| Gitlin               | 2013        | Low                               | Low                           | High                                          | Unclear                              | Low                            | Low                                | Low               | Low                   |
| Kerse                | 2010        | Low                               | Unclear                       | High                                          | Low                                  | Low                            | Low                                | Low               | Low                   |
| Kiosses              | 2015        | Low                               | Unclear                       | High                                          | Low                                  | Low                            | Low                                | Low               | Low                   |
| Klug                 | 2010        | Low                               | Unclear                       | High                                          | Unclear                              | High                           | Low                                | Low               | Low                   |
| Pfaff                | 2014        | Low                               | Unclear                       | High                                          | Low                                  | Low                            | Low                                | Low               | High                  |
| Joling               | 2011        | Low                               | Unclear                       | High                                          | Unclear                              | Low                            | Low                                | Low               | Unclear               |
| Naylor               | 2010        | Low                               | Unclear                       | High                                          | Unclear                              | High                           | Low                                | Low               | Unclear               |

**Supplementary Table 2.** Characteristics of studies included in network meta-analysis

| Author                                              |              | Type of depression        | Participants |            |            |                  |             |                                  |                          | Study's intervention |                                                                                  |
|-----------------------------------------------------|--------------|---------------------------|--------------|------------|------------|------------------|-------------|----------------------------------|--------------------------|----------------------|----------------------------------------------------------------------------------|
|                                                     |              |                           | N            | Age (mean) | Female (%) | Living alone (%) | Married (%) | Baseline depression score (mean) | Anti-depressants use (%) | Duration (weeks)     | Definition of usual care                                                         |
| <b><i>Home-based Psychological intervention</i></b> |              |                           |              |            |            |                  |             |                                  |                          |                      |                                                                                  |
| Kiosses                                             | Intervention | Major depressive disorder | 37           | 80.78      | 70.27      | NA               | NA          | 21.08 <sup>a</sup>               | 64.86                    | 12 weeks             | Care includes antidepressant medication and home visiting.                       |
|                                                     | Control      |                           | 37           | 81.03      | 78.38      | NA               | NA          | 21.41 <sup>a</sup>               | 62.16                    |                      |                                                                                  |
| Gitlin                                              | Intervention | Mixed depression          | 106          | 68.9       | 79.3       | 47.32            | 15.1        | 13.65 <sup>c</sup>               | 22.6                     | 16 weeks             | Not clearly defined.                                                             |
|                                                     | Control      |                           | 102          | 70.3       | 77.5       | 66.7             | 8.8         | 12.9 <sup>c</sup>                | 15.8                     |                      |                                                                                  |
| Naylor                                              | Intervention | Mixed depression          | 19           | 48.6       | 94.7       | NA               | NA          | 8.3 <sup>f</sup>                 | NA                       | 6 weeks              | Care includes antidepressant medication and referral to psychotherapy if needed. |
|                                                     | Control      |                           | 19           | 54.3       | 73.7       | NA               | NA          | 7.5 <sup>f</sup>                 | NA                       |                      |                                                                                  |
| Joling                                              | Intervention | Minor depression          | 86           | 81.8       | 69.8       | NA               | 30.2        | 21.17 <sup>g</sup>               | NA                       | 12 weeks             | Care includes antidepressant medication.                                         |
|                                                     | Control      |                           | 84           | 81.1       | 77.4       | NA               | 28.6        | 22.05 <sup>g</sup>               | NA                       |                      |                                                                                  |
| <b><i>Home-based Exercise</i></b>                   |              |                           |              |            |            |                  |             |                                  |                          |                      |                                                                                  |
| Pfaff                                               | Intervention | Mixed depression          | 108          | 61.2       | 62         | 22.4             | 48.1        | NA                               | 60.2                     | 12 weeks             | Not clearly defined.                                                             |
|                                                     | Control      |                           | 92           | 60.7       | 64.1       | 20.7             | 58.7        | NA                               | 47.8                     |                      |                                                                                  |

| Author                                                                     |              | Type of depression        | Participants |            |            |                  |             |                                  |                          | Study's intervention |                                                                     |
|----------------------------------------------------------------------------|--------------|---------------------------|--------------|------------|------------|------------------|-------------|----------------------------------|--------------------------|----------------------|---------------------------------------------------------------------|
|                                                                            |              |                           | N            | Age (mean) | Female (%) | Living alone (%) | Married (%) | Baseline depression score (mean) | Anti-depressants use (%) | Duration (weeks)     | Definition of usual care                                            |
| Blumenthal                                                                 | Intervention | Major depressive disorder | 53           | 53         | 74         | NA               | NA          | 17+/-5 <sup>b</sup>              | 0                        | 16 weeks             | Antidepressant medication only.                                     |
|                                                                            | Control      |                           | 49           | 52         | 75         | NA               | NA          | 16+/-4 <sup>b</sup>              | 100                      |                      |                                                                     |
| <b><i>Combined home-based psychological intervention with exercise</i></b> |              |                           |              |            |            |                  |             |                                  |                          |                      |                                                                     |
| Ciechanowski                                                               | Intervention | Mixed depression          | 40           | 43.4       | 47.5       | NA               | 65          | 2.1 <sup>d</sup>                 | 37.5                     | 19 weeks             | Not clearly defined.                                                |
|                                                                            | Control      |                           | 40           | 44.1       | 57.5       | NA               | 72.5        | 1.9 <sup>d</sup>                 | 42.5                     |                      |                                                                     |
| Ciechanowski                                                               | Intervention | Minor depression          | 72           | 72.6       | 82         | 78               | 11.0        | 1.3 <sup>d</sup>                 | 40                       | 19 weeks             | Not clearly defined                                                 |
|                                                                            | Control      |                           | 66           | 73.5       | 76         | 65               | 11.0        | 1.2 <sup>d</sup>                 | 30                       |                      |                                                                     |
| Banerjee                                                                   | Intervention | Mixed depression          | 33           | 80.4       | 85         | 82               | 18          | 27.5 <sup>a</sup>                | 11                       | 24 weeks             | Care by general practitioners, with psychiatric referral if needed. |
|                                                                            | Control      |                           | 36           | 81         | 81         | 75               | 14          | 25.1 <sup>a</sup>                | 12                       |                      |                                                                     |

<sup>a</sup>MADRS; <sup>b</sup>HAMD; <sup>c</sup>PHQ-9; <sup>d</sup>HSCL-20; <sup>e</sup>GDS; <sup>f</sup>BDI
